# Supplementary material for: Protective effects of bioactive peptides in foxtail millet protein hydrolysates against experimental colitis in mice
Source: Royal Society of Chemistry journal article supplement (doi:10.1039/d1fo02482e), 2021-12-25
Supplement: d1fo02482e1.pdf [file d1fo02482e1.pdf]

## Supplementary Data

Protective effects of bioactive peptides in foxtail millet  
protein hydrolysates against experimental colitis in mice

Bowei Zhang<sup>#a</sup>, Yingchuan Xu<sup>#a</sup>, Congying Zhao<sup>a</sup>, Yunhui Zhang<sup>a</sup>, Huan Lv<sup>a</sup>,  
Xuemeng Ji<sup>a</sup>, Jin Wang<sup>a</sup>, Wenwen Pang<sup>a</sup>, Xiaowen Wang<sup>bc</sup>, Shuo Wang<sup>\*ac</sup>

**Table: 1**

**Figure: 1**

**Table S1 Primers for qRT-PCR (sequence 5'-3')**

|                | Forward primer           | Reverse primer               |
|----------------|--------------------------|------------------------------|
| $\beta$ -actin | ACAGCAGTTGGTTGGAGCAA     | ACGCGACCATCCTCCTCTTA         |
| IL-1 $\beta$   | AAGGGCTGCTTCCAAACCTTTGAC | TGCCTGAAGCTCTTGTTGATGTG<br>C |
| IL-6           | TAGTCCTTCCTACCCCAATTTCC  | TAGTCCTTCCTACCCCAATTTCC      |
| IL-10          | GCACTACCAAAGCCACAAGG     | GCACTACCAAAGCCACAAGG         |
| IL-17          | CAAACACTGAGGCCAAGGAC     | CAAACACTGAGGCCAAGGAC         |
| IL-22          | TCGTCAACCGCACCTTTATG     | TCGTCAACCGCACCTTTATG         |
| TNF- $\alpha$  | ATTCACTGGAGCCTCGAATG     | ATTCACTGGAGCCTCGAATG         |
| IFN- $\gamma$  | TTTAACAGCAGGCCAGACAG     | TTTAACAGCAGGCCAGACAG         |
| iNOS           | GGGCTGACCTGTTTCCTACT     | GGAGGTTGAGACCCAATGGA         |
| ZO-1           | GGGCCTACACTGATCAAGA      | TGGAGATGAGGCTTCTGCTT         |
| Occludin       | ACGGACCCTGACCACTATGA     | TCAGCAGCAGCCATGTACTC         |
| Claudin-1      | AGCTGCCTGTTCCATGTACT     | CTCCCATTTGTCTGCTGCTC         |
| Claudin-3      | TCGGCCAACACCATCATCAG     | TACAACCCAGCTCCCATCTC         |
| MUC-2          | GCTGACGAGTGGTTGGTGAATG   | GATGAGGTGGCAGACAGGAGAC       |
| MUC-3          | AAAGATTACCTCCCATCTCC     | TAAAACTAAGCATGCCCTTG         |

**Figure S1.**

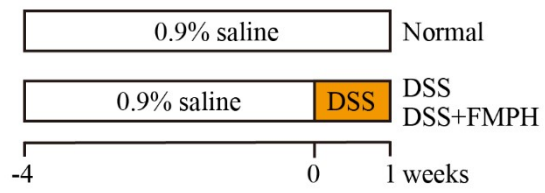

Experimental protocol for the establishment of colitis mouse model and *in vivo* studies.
