# Supplementary material for: Protective effects of bioactive peptides in foxtail millet protein hydrolysates against experimental colitis in mice
Source: Royal Society of Chemistry journal article supplement (doi:10.1039/d1fo02482e), 2021-12-25
Supplement: d1fo02482e2.xlsx [file d1fo02482e2.xlsx]

## Sheet: Sheet1
Peptide sequence	Reliability (-10lgP)	Molecular weight （Da）	Length	M/Z deviation （ppm）	m/z	Retention time（min）	Peak area
HASEGGHGPHWPLPPFGESHGPY	71.36	2449.1	23	0.4	1225.56	33.1	5410000000
HASEGGHGPHWPLPPFGESHGP	71.07	2286.04	22	1.3	1144.03	29.29	4720000000
LQQQSLSHLTVQSITAQQQR	69.62	2293.21	20	-0.8	1147.61	33.06	683000000
ALLQQQSLSHLTVQSITAQQQR	69.6	2477.34	22	-2.6	1239.67	43.1	643000000
GGIYGGTHGQGVGGGGRPVGEQ	69.04	1995.95	22	0.7	998.984	18.45	99300000
QQQSLSHLTVQSITAQQQR	68.94	2180.13	19	0.5	1091.07	28.47	288000000
LPQQSALLQQQSLSHLTVQSITAQQQRILSPLNQ	68.86	3796.06	34	2	1266.36	56.02	3380000
GGIYGGTHGQGVGGGGRPVGE	68.46	1867.89	21	0.4	934.954	18.75	126000000
SMMLQQPWTSPLQQYWTPR	67.91	2377.13	19	8.4	1189.58	56.21	6200000
LLQQQSLSHLTVQSITAQQQR	67.24	2406.3	21	0.5	1204.16	39.34	4060000
LPQQSALLQQQSLSHLTVQSITAQQQR	66.89	3030.62	27	-0.1	1011.21	49.26	1120000000
LQQQYLAHLTLQSIMAQQHQVLSPFSR	65.46	3164.66	27	3.3	1055.9	55.79	5950000
ALLQQQSLSHLTVQSITAQQQRILSPL	65.14	3000.67	27	0.1	1001.23	55.43	50100000
ALLQQQSLSHLTVQSITAQQQRILSPLNQ	65.01	3242.77	29	0.8	1081.93	55	61500000
GGIYGGTHGQGVGGGGRPV	64.21	1681.83	19	1	841.922	18.4	421000000
LAHLTLQSIMAQQHQ	63.95	1717.89	15	1.7	859.955	39.76	98100000
LAHLTLQSIMAQQHQVLSPF	63.42	2261.2	20	0.9	754.741	55.81	50400000
RIDFAPGGQNPPHTHPR	63.18	1895.95	17	0.9	474.995	15.44	54800000
IDFAPGGQNPPHTHPR	63.08	1739.85	16	2.7	870.934	17.84	2110000000
RIDFAPGGQNPPHTHP	62.95	1739.85	16	0.7	870.932	19.43	310000000
LAHLTLQSIMAQQHQVLSP	62.84	2114.13	19	-1	705.717	51.44	93500000
HLTLQSIMAQQHQVLSPFS	62.66	2164.11	19	-0.7	1083.06	54.18	32900000
LAHLTLQSIMAQQHQVLSPFS	62.53	2348.23	21	-0.1	1175.12	55.7	29300000
MLQQPWTSPLQQYWTPR	62.4	2159.06	17	3.6	1080.54	56.15	7750000
HASEGGHGPHWPLPPFGES	62.27	1994.9	19	-0.2	998.458	34.29	654000000
AVGNPAAFWQQQQLLR	62.1	1825.96	16	-0.2	913.986	52.49	236000000
YGGTHGQGVGGGGRPV	61.61	1454.7	16	1.6	728.359	18.48	5590000
SAMFLPQQSALLQQQSLSHLTVQSITAQQQR	61.37	3466.8	31	0	1156.61	54.89	162000000
LPQQSALLQQQSLSHLTVQSITAQQQRILSPL	61.36	3553.96	32	4.9	1185.67	56.07	6220000
NHITAAYWQQQQLLPNV	61.31	2023.03	17	-2.4	1012.52	52.94	62500000
AHLTLQSIMAQQHQVLSPFS	61.04	2235.15	20	0.5	1118.58	54.23	73400000
FLPQQSALLQQQSLSHLTVQSITAQQQR	60.91	3177.69	28	0.5	1060.24	52.28	795000000
ALSQQQSLAHVTVQSITAQQQQYLPA	60.52	2837.47	26	-1.6	1419.74	52.91	75200000
MFLPQQSALLQQQSLSHLTVQSITAQQQR	60.45	3308.73	29	-0.9	1103.92	54.32	1150000000
LQQPWTSPLQQYWTPR	60.44	2028.02	16	-0.3	677.014	55.49	601000000
ILVDKEDEEEDGEAGDGDEDK	60.31	2305.96	21	-1.7	1153.98	21.59	78200000
LQQQSLSHLTVQSITAQQQRILSPLN	60.19	2930.59	26	0.7	977.873	52.48	86500000
AMNPAAFWQQQQLLR	60.18	1800.91	15	-1.7	901.46	54.3	23700000
ALANHITAAYWQQQQLLPNV	60.12	2278.19	20	0.8	1140.1	55.17	51900000
SGGAPGGGADEEGGVDDDHDE	59.96	1941.71	21	-0.5	971.862	17.15	2560000
ILPWGDEAGSAGNAPR	59.9	1609.78	16	0.1	805.9	35.88	696000000
ALLQQQSLSHLTVQSITAQQQRILSPLN	59.9	3114.71	28	1.8	1039.25	54.8	74800000
EGLMHLGFITMEPR	59.86	1629.8	14	0.7	815.908	51.08	12300000
LPQQSALLQQQSLSHL	59.46	1789.97	16	-1	895.991	45.12	166000000
KGENDLPGLTDTEKPR	59.41	1768.9	16	0.7	885.456	19.27	142000000
SEGGHGPHWPLPPFGESHGPY	59.24	2241	21	0.6	1121.51	40.64	181000000
PGGQNPPHTHPR	59.22	1293.63	12	-0.1	647.823	17.83	63100000
YGGGEGGEGYLPFPPR	59.04	1651.76	16	0.1	826.889	46.18	4735000000
HVTVQSITAQQQQYLPAFS	58.92	2145.09	19	2	1073.55	52.06	7230000
GGIYGGTHGQGVGGGGRPVGEQV	58.82	2095.02	23	0.3	1048.52	21.45	28700000
NQLHDFGSEILPR	58.78	1524.77	13	0	509.263	36.76	156000000
LQQQSLSHLTVQSITAQQQRILSPL	57.94	2816.55	25	-0.3	939.857	53.25	59200000
AHLTLQSIMAQQHQVLSPF	57.59	2148.11	19	1.2	1075.07	54.46	41000000
AHLTLQSIMAQQHQVLSP	57.58	2001.05	18	-0.7	1001.53	48.14	12100000
ARIDFAPGGQNPPHTHP	57.56	1810.89	17	-0.7	906.45	19.96	62000000
IDFAPGGQ(+.98)NPPHTHPR	57.49	1740.83	16	-2.2	436.215	18.81	0
LREQFPGANDFGSEVIPG	57.24	1931.94	18	-0.3	966.976	51.58	82900000
SEGGHGPHWPLPPFGESHGP	57.12	2077.94	20	0.3	1039.98	34.94	0
VTETDGAGSSGDKEEKEDEKEETAAPR	57.05	2864.28	27	1.4	573.864	12.99	5790000
LPQQSALLQQQSLSHLTV	56.85	1990.08	18	0	996.05	50.27	29000000
SHLTVQSITAQQQR	56.66	1595.84	14	1.2	798.927	19.65	31700000
AVANAYWQQQQLRPFNQ	56.55	2061.02	17	0.2	1031.52	46.27	2780000
GPPPFVVVPEIVPR	56.5	1501.87	14	0.1	751.94	54.14	32500000
APGGQNPPHTHPR	56.27	1364.67	13	0.3	683.342	18.01	7580000
LPQQSALLQQQSLSHLTVQSI	56.22	2318.26	21	0.1	1160.14	53.19	74700000
M(+15.99)FLPQQSALLQQQSLSHLTVQSITAQQQR	56.19	3324.72	29	0.3	1109.25	53.27	32800000
LPNNADGSSPIPH	56.15	1317.63	13	0.1	659.823	22.18	33800000
VTVEKDAYDNVAHA	55.54	1530.73	14	1.6	766.374	21.34	20400000
M(+15.99)FLPQ(+.98)QSALLQQQSLSHLTVQSITAQQQR	55.41	3325.71	29	6	1109.58	53.17	1250000
HVVTGPVLAPTAGGRER	55.4	1715.94	17	0.7	572.989	17.2	4160000
LPQQSALLQQQSLSHLTVQSITAQQQRILSP	55.34	3440.87	31	1.3	1147.97	54.61	61400000
MYPRPPKPDAPR	55.33	1423.74	12	1	475.588	16.55	121000000
RLVSGAIAGAVSR	55.33	1255.74	13	-0.2	628.875	20.28	22100000
RGHVFEEMQRPGTPL	55.16	1752.87	15	-2.2	585.297	23.62	50200000
FAPGGQNPPHTHPR	55.14	1511.74	14	0.6	504.92	17.95	15300000
YNQLHDFGSEILPR	55.01	1687.83	14	-0.6	844.923	40.36	37200000
THLMVGSSGADSMAGV	54.99	1518.68	16	0.8	760.348	33.45	43700000
DFAPGGQNPPHTHPR	54.98	1626.77	15	-0.1	814.39	18.05	18100000
ANHITAAYWQQQQLLPNV	54.92	2094.06	18	-0.9	1048.04	53.15	377000
THLM(+15.99)VGSSGADSM(+15.99)AGV	54.77	1550.67	16	-1	776.342	20.99	12400000
HFPPDYPFKPPK	54.71	1468.75	12	0	490.591	30.68	9620000
QQQ(+.98)SLSHLTVQSITAQQQR	54.7	2181.11	19	9.7	1091.57	28.79	0
ALLQQQSLSHLTVQSITAQQ	54.57	2193.18	20	0.6	1097.6	50.75	56800000
AGIIEADRVLTVSPYYAEE	54.56	2095.05	19	0.9	1048.53	54.01	12000000
HLTLQSIMAQQHQVLSPF	54.36	2077.08	18	-0.3	693.366	54.43	11100000
SILSSPAMSLQQQSALWQHQ	54.36	2239.11	20	0.8	1120.56	54.15	60300000
NMDWAGGLGSSTPSLRPTAPH	54.36	2151.02	21	0.3	1076.52	44.11	0
LQQPWTLPFQQYWTPR	54.25	2088.06	16	2	1045.04	58.74	9900000
QQQSLSHLTVQSITAQQQRILSPL	54.19	2703.47	24	-0.4	902.163	52.38	14200000
SPLAQWQQQQLVSSV	54.18	1697.87	15	0.1	849.944	54.05	76100000
FKLEDSAEVKPH	54.14	1398.71	12	-0.9	467.245	18.96	8000000
LPQQSALLQQQSLSHLTVQSITAQQQ	53.96	2874.52	26	1.9	1438.27	53.04	888000000
VGGVGHGTTGTGTGGMGTG	53.89	1559.7	19	1.9	780.859	16.49	3470000
LQQQSLSHLTVQSITAQQQRILSPLNQL	53.83	3171.74	28	-4	1058.25	55.67	8660000
SAELEQRPHHPVRPI	53.78	1764.94	15	1.9	442.243	13.96	3780000
LPQQSALLQQQSLSHLTVQS	53.68	2205.18	20	-0.1	1103.59	47.71	163000000
LPQQSALLQQQSLSHLT	53.65	1891.02	17	0.6	946.516	44.1	43800000
YPRPPKPDAPR	53.62	1292.7	11	0.6	431.907	14.8	48700000
GQLGEHGGAGMGGGQFQPV	53.55	1782.81	19	-0.2	892.413	31.14	9820000
THVPWHLPPVTTL	53.5	1496.81	13	-0.1	749.414	46.6	88500000
TVNKGDIFVFPR	53.28	1391.76	12	-0.2	464.926	33.04	143000000
SLSHLTVQSITAQQQR	53.19	1795.95	16	0.1	898.984	25.72	90300000
LQQQSLSHLTVQSITAQQQRILSPLNQLA	53.08	3242.77	29	1	1081.93	55.6	40100000
GGQNPPHTHPR	53.07	1196.58	11	0.5	599.298	17.97	19200000
SLGVAGSQPGIEGEEIAPL	52.91	1822.93	19	-0.3	912.472	54.91	529000000
KLTDKDPNVTVNPDE	52.88	1683.83	15	0.1	842.923	20.01	28100000
LAHLTLQSIMAQQH	52.87	1589.83	14	0.1	530.952	40.07	84900000
SMMLQQ(+.98)PWTSPLQQYWTPR	52.84	2378.12	19	7.4	1190.08	56.87	0
PSSAMFLPQQSALLQ(+.98)QQSLSHLTVQSITAQQQR	52.79	3651.87	33	6.9	1218.3	55.25	5080000
GLAHITGGGFTDNIPR	52.71	1624.83	16	-0.5	813.423	33.75	3010000
HVVQDLKPDIQ	52.53	1290.69	11	0	646.354	20.07	107000000
AFWQQQQLVNQLA	52.53	1572.8	13	2.4	787.412	56.09	5730000
ADEPPKVPIPTPL	52.41	1372.76	13	1.1	687.388	46.44	10800000000
AHWQQQQLVSSV	52.29	1409.71	12	0.4	705.86	29.23	393000000
VVTFDKNPDNHP	52.28	1381.66	12	0.8	691.839	17.21	6420000
AHVTVQSITAQQQQYLPA	52.25	1982.02	18	-0.5	992.018	42.72	11800000
LQQQYLAHLTLQSIMAQQHQ	52.17	2378.22	20	0	793.746	52.43	22900000
AYWQHQQLLPFNQ	52.14	1671.82	13	-0.3	836.915	50.86	92300000
M(+15.99)YPRPPKPDAPR	52.06	1439.73	12	2.1	480.92	15.43	17300000
GRFEEFFPIGGESPES	52.06	1783.81	16	0	892.91	53.84	968000000
RLQQALAASILSSPAMS	52.02	1742.93	17	-0.1	872.475	50.28	75600000
VGHDVDHFTSPEGVPGVPET	52	2074.96	20	0.2	692.661	37.88	93400000
KILVDKEDEEEDGE	51.99	1646.75	14	1.8	824.385	16.89	26300000
HEVEVEYPDGRPTEK	51.98	1783.84	15	0.8	595.62	17.17	4830000
LAHLTLQSIMAQQHQ(+.98)VLSPFS	51.95	2349.22	21	7.7	1175.62	55.53	4630000
EHLIAGWAPK	51.74	1120.6	10	0.3	561.309	22.93	10600000
HHHGINVGFTGNYKE	51.69	1708.81	15	1.9	570.611	17.89	7560000
SPFAQLQQQQLV	51.69	1385.73	12	0.4	693.873	51.93	84700000
GHVFEEMQRPGTPL	51.66	1596.77	14	0.3	799.393	29.24	371000000
HLTVQSITAQQQ	51.58	1352.7	12	1	677.36	22.9	164000000
HHHGINVGFTGN	51.45	1288.61	12	0.8	430.543	15.56	6080000
GGGEGGEGYLPFPPR	51.44	1488.7	15	0.1	745.357	40.77	568000000
PAQDIAPAPPR	51.43	1131.6	11	0.4	566.809	18.08	21800000
SSFDFIDGYEKPVEG	51.38	1688.76	15	0.1	845.386	52.1	1610000000
THVPWHLPPVTT	51.33	1383.73	12	-0.8	692.872	35.42	2660000000
SHINIVVIGHVDSGK	51.3	1573.86	15	-0.6	525.626	22.46	11400000
IIMNHPGQIGNG	51.26	1249.62	12	-0.9	625.819	20.97	69600000
GPHWPLPPFGESHGPY	51.24	1773.83	16	0.4	592.283	48.23	266000000
TLQSIMAQQHQVLSPFSR	51.24	2070.07	18	-0.3	691.03	47.67	22000000
RPPPAALPAPPLRP	51.23	1448.86	14	-0.1	725.438	26.13	37300000
NVIHGSDSIESAT	51.23	1328.62	13	-0.4	665.317	20.65	35700000
HLTVQSITAQQQR	51.13	1508.81	13	0.1	755.41	19.37	28500000
RVVHGIDVFDPK	51.12	1380.75	12	-0.9	461.257	21.92	0
SSGSPGEDNYDEDDH	51.07	1622.56	15	3.5	812.29	14.33	495000
TAAYLQQQQLLPNV	51	1585.85	14	-0.6	793.93	53.85	70700000
LPQQSALLQQQSLSHLTVQSITAQQ	51	2746.46	25	-1.6	1374.24	53.31	118000000
GTIEVAGTDKETTTQGH	50.89	1743.83	17	2	582.284	15.68	2520000
SVFNQVPLANPY	50.86	1347.68	12	-0.4	674.848	54.44	207000000
FYPADDVKPR	50.84	1206.6	10	-1.1	403.208	19.36	24500000
PGGQNPPHTHP	50.81	1137.53	11	0.1	569.773	19.47	50600000
SLSHLTVQSITAQQQ	50.8	1639.85	15	1.1	820.935	33.63	385000000
GYEHPIVQSYRLQQALAASILPSS	50.8	2627.37	24	1.3	876.799	54.8	33700000
RLQQALAASILSSPAMSLQQQSA	50.67	2398.26	23	0.1	1200.14	54.39	102000000
ALASPVAQLQQQQLVSNV	50.65	1893.03	18	0.2	947.523	53.81	111000000
THVPWHLPPVT	50.65	1282.68	11	0.1	642.348	33.44	2680000000
NAFSQQQQLLPFN	50.62	1533.76	13	0.4	767.886	55.21	141000000
GMDEDAPAGSGGPGPK	50.6	1441.61	16	1.3	721.815	16.44	783000
NIHFPPDYPFKPPK	50.57	1695.88	14	0	566.3	40.55	8240000
WQQQQLVNQLALTSPA	50.55	1823.95	16	-0.5	912.983	55.06	11300000
MALDRPSTPTIDRG	50.53	1528.77	14	-0.4	765.39	23.67	0
SPVYDMDGH	50.49	1019.4	9	-0.4	510.708	20.52	14200000
IFTGYWEDVGTIK	50.39	1527.76	13	-0.2	764.888	52.66	166000000
LLQQQSLSHLTVQSITAQQQ	50.35	2250.2	20	1.2	1126.11	47.31	50200000
RLQQALAASILSSPAMSLQQQSALWQHQSLASPA	50.32	3616.88	34	2.7	1206.64	56.14	2360000
KVTIDFEPFKPI	50.31	1432.8	12	0.9	717.406	48.65	24600000
LAHLTLQSIMAQ	50.28	1324.72	12	1.1	663.367	49.33	16200000
HLGFITMEPR	50.22	1199.61	10	0	400.878	27.61	40400000
VVHGIDVFDPK	50.04	1224.65	11	-0.5	613.332	26.82	209000000
SHLTVQSITAQQQ	50.01	1439.74	13	-0.5	720.875	23.16	211000000
APGGQNPPHTHP	50.01	1208.57	12	-1.2	605.291	22.23	17800000
AHWQQQQLVSS	50.01	1310.64	11	-1.4	656.325	21.4	31400000
SDLTEDGAEEGKEAPK	49.88	1674.76	16	1.2	559.261	16.06	1980000
IYGGTHGQGVGGGGRPV	49.82	1567.79	17	0.8	523.603	16.24	4560000
SPIAHWQQQQLV	49.79	1433.74	12	-0.8	717.878	35.35	35200000
EVLGSAPQVKPR	49.77	1279.72	12	0.2	427.582	17.39	82000000
TLPFQQYWTPR	49.76	1435.72	11	0.2	718.87	54.26	20467777777
NMDWAGGLGSSTPSLRPT	49.74	1845.87	18	0.9	923.942	49.63	2840000
TRVTVEKDAYDNVAHA	49.71	1787.88	16	0.3	596.967	19.53	5220000
AYWQHQQLLPFN	49.65	1543.76	12	1	772.887	51.7	79500000
GSAPQVKPR	49.6	938.53	9	0.5	470.272	17.47	3780000
YWQQQQLRPF	49.55	1392.69	10	-0.1	697.354	40.37	92400000
LGEHGGAGMGGGQFQPV	49.52	1597.73	17	0.1	799.873	30.41	0
PRPPKPDAPR	49.36	1129.64	10	-0.1	377.552	16.28	7310000
ANFRDEVLPR	49.34	1215.64	10	-0.5	406.219	21.79	16500000
GAMGGGGGGYGDLH	49.33	1204.49	14	-0.2	603.254	19.98	102000000
ALGQIKPPGVEV	49.33	1206.7	12	0.7	604.356	35.01	41500000
DWAGGLGSSTPSLRPTAPHQPA	49.32	2202.08	22	-0.5	1102.05	38.83	13000000
GNPVGGVGHGTTGTGTGGM(+15.99)GTG	49.29	1843.81	22	4.4	922.917	16.09	2190000
VRTETSPEDVGGM	49.27	1376.62	13	0.5	689.32	21.33	96400000
RGVKDEGLVVAPGQGPEG	49.18	1763.92	18	0.2	882.966	22.62	40300000
AFWQQQQLVNQ	49.05	1388.68	11	-0.1	695.349	48.44	2390000000
AVPDIYHPDGSTDGH	49.03	1579.69	15	-0.6	527.57	23.92	31500000
AQLQQQQLVSSVLNQV	48.98	1781.96	16	1.6	891.99	56.17	3570000
NVETFPGVNTLGVSLAR	48.96	1772.94	17	-1.7	887.477	52.58	7510000
FAMGRFASPASM	48.93	1271.58	12	1.6	636.798	41.41	11100000
GYEHPIVQSYR	48.87	1347.66	11	0.1	450.226	18.87	10600000
VEAPAEEEAPKPKPK	48.87	1618.86	15	1.5	405.722	12.25	254000
LGSAPQVKPR	48.84	1051.61	10	0.1	526.814	17.45	4240000
ASEGGHGPHWPLPPFGESHGPY	48.8	2312.04	22	0.5	771.688	39.92	119000000
PDIYHPDGSTDGH	48.74	1409.58	13	0.4	705.8	17.99	12900000
NDLIHGLYPEA	48.7	1240.61	11	0	621.312	45.63	568000000
AFFDQFGSSMIK	48.67	1376.64	12	0.2	689.329	53.98	10000000
GSGGGGGGGLTMAPHT	48.48	1312.58	16	0.1	657.299	19.35	5790000
ALDRPSTPTIDRG	48.47	1397.73	13	-0.6	466.916	19.35	23800000
AYWQQQQFLPNV	48.36	1520.74	12	1.3	761.379	56.17	51400000
MVEPGHLDQLLHPQ	48.32	1612.8	14	-2.9	807.407	40.11	175000000
ALLQQQSLSHLTVQSITAQQQ	48.32	2321.23	21	-2.6	1161.62	50.36	1220000000
QQQPPYGGGVQGQ	48.22	1342.63	13	-0.2	672.32	19.91	147000000
VEAPAEEEAPKPK	48.2	1393.71	13	1.1	465.577	13.89	599000
SIMAQQHQVLSPF	48.2	1484.74	13	-0.2	743.38	41.76	48300000
LVEPQHQYNAIYT	48.19	1574.77	13	-0.9	788.393	29.28	1140000000
FSVEPADERRP	48.19	1301.64	11	-1.2	434.886	19.92	4730000
KGENDLPGLTDTEKP	48.18	1612.79	15	0.1	807.404	23.84	22800000
ATEYGVVLGGEGK	48.17	1278.65	13	-0.2	640.33	26.78	28000000
FAFSDYPELNLPE	48.13	1540.71	13	2.6	771.364	56.28	137000000
TSPLQQYWTPR	48.08	1375.69	11	0	688.851	40.4	599000000
HEVEVEYPDGRPTE	48.07	1655.74	14	0.4	828.879	20.8	3800000
IDFAPGGQNPPHTHP	48.05	1583.75	15	-0.3	528.923	22.77	5310000000
YGGGEGGEGYLPFPP	47.99	1495.66	15	5.5	748.843	56.2	494000000
AAMNPAAFWQQQQLLR	47.99	1871.95	16	2.1	624.991	54.63	238000000
LQQQQLLPNVFN	47.91	1440.77	12	0.1	721.394	55.42	122000000
PFQQYWTPR	47.87	1221.59	9	-0.5	611.803	53.99	40100000
SPIAHWQQQQLVSSV	47.87	1706.87	15	-1.2	854.443	40.95	54700000
GEHGGAGM(+15.99)GGGQFQPV	47.73	1500.64	16	5.8	751.332	19.02	7860000
DWAGGLGSSTPSLRPT	47.67	1600.78	16	1	801.4	46.07	9970000
A(+42.01)SHIVGYPR	47.65	1040.54	9	-0.3	521.277	22.84	18500000
LLDVLKPNLPEHA	47.64	1457.82	13	-0.9	729.919	39.52	49300000
AHWQQQQLVSSVFNQVA	47.6	1968.98	17	-1.3	985.496	53.28	100000000
HGIDVFDPK	47.58	1026.51	9	-0.1	514.264	21.76	22300000
LQQALAASILPSSAM	47.57	1499.8	15	0.5	750.909	55.1	53500000
GPGAIPIGKPSIHPSPI	47.56	1636.93	17	0.8	546.651	31.53	13600000
MFLPQQSALLQQQSLSH	47.53	1954.99	17	-0.6	652.671	50.97	40200000
AFFPDDLPEPR	47.5	1302.62	11	0.1	652.319	47.98	80400000
ALASPVTQLQQQQLVSSV	47.47	1896.03	18	-0.1	949.023	54.08	161000000
THVPWHLPPV	47.4	1181.63	10	-0.1	394.885	38.27	27000000000
HDFGSEILPR	47.37	1169.58	10	-1.4	390.868	26.06	864000000
RLQQALAASILPSSA	47.35	1524.86	15	0.2	763.439	42.9	1090000000
AHLTLQSIMAQQHQ	47.32	1604.81	14	-0.3	535.943	32.6	0
HLTVQSITAQQ	47.31	1224.65	11	-0.3	613.33	22.96	17300000
LREQFPGANDFGSE	47.24	1565.71	14	1.4	783.864	37.83	0
QQQQLLPLNPL	47.23	1290.73	11	-0.4	646.372	55.42	413000000
LTGITGIVNGMD	47.22	1189.6	12	-1.7	595.807	53.24	179000000
FRQQLLPFNQ	47.21	1289.69	10	0.7	645.852	40.94	11600000
PQQLRPGHI	47.18	1044.58	9	0.3	523.299	23.07	18700000
QQQQLLPNVFNQ	47.16	1455.75	12	-1.8	728.88	54.4	72400000
NAYWQQQQLRP	47.16	1430.71	11	0.2	716.36	30.17	189000000
IYSDVENSEH	47.14	1191.5	10	2.3	596.761	15.71	5340000
SHLTVQSITAQ	47.14	1183.62	11	-0.2	592.817	22.77	53100000
TALGYGNPIVQP	47.12	1228.65	12	-0.7	615.329	45.09	585000000
VFIDHPSFLE	47.06	1202.6	10	0	602.306	47.73	105000000
AFSDYPELNLPE	47.05	1393.64	12	2.7	697.829	56.08	11800000
LQQQQLLPLNPL	47.05	1403.81	12	1.5	702.915	56.18	44700000
HLDQLLHPQ	47.04	1099.58	9	0.2	550.796	20.85	67500000
ALGYENPIVQSNRLQQALAA	47.02	2155.14	20	-2.9	1078.57	52.6	8690000
LVIPSADAAAPH	46.96	1160.62	12	-0.7	581.316	29.74	11700000
DVDHFTSPEGVPGVPET	46.95	1781.81	17	-2.1	891.911	48.16	7260000
TGGLVDTVIEGK	46.94	1187.64	12	2	594.828	34.01	21600000
STRPEGDLGPLHP	46.92	1374.69	13	-1.1	459.236	22.04	226000000
ALLQQQSLSHLTVQSITA	46.91	1937.06	18	0.1	969.537	50.83	63300000
LRINPLATMNPAA	46.91	1380.75	13	1	691.385	41.99	967000000
RLQQALAASILSSPA	46.89	1524.86	15	-0.2	763.438	44.97	1340000000
SPAAFLQQPIVGSA	46.88	1384.73	14	0.6	693.375	52.7	40000000
MGDVLHIDAGST	46.87	1214.56	12	0.1	608.287	35.4	38100000
LLGDVQVYPEK	46.87	1259.68	11	1.3	630.846	34.17	12800000
GYEHPIVQSYRLQQALAASILPS	46.85	2540.34	23	1.1	847.788	54.81	30200000
AWWEDLAARPA	46.81	1284.63	11	0.6	643.32	52.17	67700000
AWWEDIAARPA	46.81	1284.63	11	0.6	643.32	52.17	67700000
KLTDKDPNVTVNPDEV	46.8	1782.9	16	-0.2	892.457	26.67	44700000
IYHHVVGGVLNPN	46.72	1417.75	13	-0.4	709.88	20.32	18300000
PLQQYWTPR	46.71	1187.61	9	0.1	594.812	39.94	5120000
RGEVFVFPR	46.7	1105.6	9	-0.2	553.809	25.59	14800000
LPQQSALLQQQ(+.98)SLSHLTVQSITAQQQRILSP	46.68	3441.86	31	5	1148.3	54.85	0
LGTNHPMGPL	46.67	1035.52	10	-0.4	518.766	22.92	11900000
HFGPAPGVPH	46.58	1014.5	10	0	508.259	18.26	6640000
AFWQQQQLLR	46.58	1316.7	10	0	659.357	42.28	85500000
HVVTGPVLAPT	46.58	1089.62	11	-0.2	545.816	21.92	495000000
AVANAYWQQQQLRP	46.51	1671.85	14	0.4	836.932	34.9	0
REQFPGANDFGSEVIPG	46.51	1818.85	17	1	910.435	49.5	137000000
NLLSVAYKNVIGAR	46.48	1516.87	14	0.1	506.632	47.56	4160000
WQQQQQLPFNPLR	46.45	1681.87	13	1.4	841.943	47.85	35900000
VTVDKDAPINQ	46.45	1198.62	11	-0.6	600.317	18.1	4690000
WQQQQLRP	46.43	1082.56	8	0.3	542.288	20.19	905000000
FLPQQSALLQQQSLSHL	46.41	1937.04	17	-0.2	969.526	51.68	134000000
SAMFLPQQSA	46.39	1078.51	10	0.1	540.263	38.32	7790000
IHDAVIGPLQPS	46.39	1245.67	12	-0.1	623.843	30.41	14100000
SLSHLTVQSITAQQ	46.38	1511.79	14	0.6	756.905	34.17	41400000
RVVIGPSVSDE	46.33	1156.61	11	0	579.312	21.89	34800000
NVETFPGVNTLGVSLARIDFAPGGQNPPHTHPR	46.33	3494.78	33	2.3	874.705	51.18	8590000
SALWQHQSLASPA	46.27	1394.69	13	0.6	698.355	31.44	84800000
GMHQQPPYGGVP	46.24	1266.58	12	-0.2	634.298	22.5	1340000000
SILSSPAMSLQQQSALWQHQS	46.14	2326.14	21	1.2	1164.08	53.68	60500000
AAIKAEAEGNLK	46.13	1213.67	12	2.5	405.564	13.54	192000
ALANHITAAYWQQQQ(+.98)LLPNV	46.1	2279.17	20	8.7	1140.6	55.12	0
NVIHGSDSIESA	46.05	1227.57	12	0.5	614.794	19.31	25700000
IGIAPGAPERPQ	46.03	1204.66	12	-0.5	603.335	21.79	32900000
LLQQQSLSHLTVQSITAQ	45.99	1994.08	18	1.2	998.048	47.93	3450000
SSFDFIDGYEKPV	45.97	1502.69	13	0.1	752.354	52.25	254000000
LQQQQLLPNVFNQ	45.96	1568.83	13	-0.2	785.423	55.55	138000000
QQQSLSHLTVQSITAQQQRILSPLNQ	45.95	2945.57	26	0	982.863	51.96	37500000
TGFKPPVTNSKPI	45.94	1384.77	13	-1.2	462.597	21.16	17700000
HGGVWVDRIPA	45.91	1205.63	11	-0.2	603.822	25.08	2560000
AHWQQQQLVS	45.9	1223.6	10	-0.6	612.809	21.29	157000000
GGDVWFPQPAPK	45.88	1297.65	12	0.1	649.83	36.18	44200000
AGIIEADRVLTVSPY	45.86	1602.86	15	2	802.44	51.47	72700000
LDVLKPNLPEHA	45.85	1344.74	12	-0.2	449.254	30.6	0
ERVDLEVKPKPDNTIG	45.79	1808.96	16	-1.4	603.994	21.51	18200000
NAYWQQQQLRPFNQLAIANPA	45.68	2470.25	21	1.7	1236.13	54.21	20800000
ALKPPSWDE	45.66	1041.51	9	-0.1	521.764	27.23	132000000
GIAPGAPERPQ	45.63	1091.57	11	-0.1	546.793	17.39	4580000
AILQQQLSPLNPL	45.59	1433.82	13	0.4	717.92	55.86	1980000000
EHVIKPVIPEQ	45.58	1287.72	11	0.1	644.867	20.44	17900000
IVLLGTGKKKFER	45.58	1487.92	13	0.1	372.987	17.11	3900000
TAMDIPPPR	45.56	996.506	9	-1.7	499.26	19.62	39400000
ASEGGHGPHWPLPPFGESHGP	45.53	2148.98	21	2.3	717.334	34.67	30700000
VNGMDVSEWDPSKDK	45.53	1705.76	15	0.2	853.888	33.4	41700000
AMFLPQQ(+.98)SALLQQQSLSHLTVQSITAQQQR	45.51	3380.75	30	5.5	1127.93	54.8	1420000
QQSLSHLTVQSITAQQQR	45.47	2052.07	18	0.9	1027.04	28.29	8940000
AADVGADLVGKVE	45.47	1242.65	13	0.6	622.33	33.92	7180000
HEVEVEYPDGRPT	45.45	1526.7	13	0.6	764.358	19.44	3470000
TGYWEDVGTIK	45.41	1267.61	11	-1.8	634.81	38.46	61100000
LQQ(+.98)PWTLPFQQYWTPR	45.4	2089.04	16	9.4	1045.54	56.66	57400
VRTETSPEDVGGM(+15.99)	45.38	1392.62	13	0.2	697.317	15.75	7690000
MSHISTGGGASLE	45.35	1245.57	13	0.9	623.791	19.75	10600000
SPLAQWQQQQLV	45.35	1424.74	12	0.1	713.378	52.23	60600000
DFGSEILPR	45.35	1032.52	9	-0.4	517.269	40.89	487000000
HASEGGHGPHWPLPP	45.32	1574.74	15	0	525.92	20.73	102000000
AILQQQLSPLNPLA	45.32	1504.86	14	-0.3	753.438	55.96	81300000
ERVDLEVKPKPD	45.31	1423.77	12	0.4	475.596	16.62	843000
DVSEWDPSKDK	45.29	1304.59	11	-1.7	653.3	20.96	94600000
QQPWTSPLQQYWTPR	45.27	1914.94	15	0.7	958.477	54.33	171000000
WQQQQLLR	45.26	1098.59	8	0.1	550.304	23.06	42500000
ATMLPNVFN	45.24	1005.5	9	-0.8	503.755	53.28	50600000
LLDPPLHEFLPDGN	45.24	1575.79	14	-0.5	788.904	54.33	2150000000
VGYIYKDELVE	45.23	1326.67	11	0.7	664.343	36.46	35400000
DDGESPEMAGPR	45.19	1259.51	12	0.9	630.762	17.44	22900000
GPHWPLPPFGESHGP	45.19	1610.76	15	0.2	537.928	43.14	159000000
VLYPGDESPEGK	45.17	1289.61	12	-0.1	645.814	21.1	11700000
ALLQQQSLSHLTVQSITAQ	45.17	2065.12	19	-1.8	1033.56	50.83	105000000
KAEAEEEGDIV	45.17	1188.55	11	0.4	595.283	18.52	17000000
EDFGGGHPDPN	45.15	1140.45	11	0.7	571.231	15.7	5910000
IDHVKGEPAIPH	45.1	1311.69	12	0.1	438.238	17.37	2260000
TLDHFNPTDH	45.1	1195.53	10	-1	399.515	19.24	11500000
WEEGEGEWRPE	45.1	1402.58	11	-0.1	702.297	33.26	8940000
KPLFSPEHFSPL	45.07	1397.73	12	-0.6	699.874	40.31	122000000
WQQQQLRPF	45.06	1229.63	9	0.2	615.823	33.58	161000000
SPLFWSQAT	45.03	1035.5	9	-0.4	518.758	51.35	7790000
VVILDPGINV	45.02	1037.61	10	-0.1	519.813	54.39	58700000
KEEVKVEVEDGNV	45.01	1472.74	13	0.2	737.375	19.62	20100000
WQQQQFLPNV	44.98	1286.64	10	-1	644.327	53.37	2720000000
QQQQFLPNVFNQ	44.97	1489.73	12	0.1	745.873	55.36	77500000
GKVPIGIGENT	44.95	1083.59	11	0.5	542.804	21.74	22300000
MFLPQQSALLQQQSLSHL	44.94	2068.08	18	-0.4	1035.05	54.88	153000000
MFLPQQSAL	44.92	1033.53	9	-0.9	517.77	49.39	30400000
ALNSFVDGH	44.92	958.451	9	-0.3	480.233	22.96	150000000
ELPQQLRPGHI	44.86	1286.71	11	-0.5	644.362	23.01	197000000
AFDVGPWPK	44.85	1015.51	9	-0.3	508.764	37.43	8910000
SPVAQLQQQQLVSNV	44.84	1637.87	15	0.4	819.944	46.02	152000000
YGFMTDDH	44.83	984.365	8	-0.1	493.19	26.39	24400000
MEIIPNPK	44.82	940.505	8	-1.1	471.259	22.91	123000000
MFNPMATVIPPM	44.8	1347.64	12	1.4	674.828	56.33	48100000
YTIGGDLGGGEGH	44.72	1231.55	13	0.7	616.781	27.19	38700000
LVNNIATMLPNV	44.62	1297.71	12	5.5	649.864	56.21	1590000
SAFQSEGLRPT	44.62	1191.59	11	-0.6	596.801	21.26	17900000
FGFEVDTLRPI	44.61	1292.68	11	1.7	647.347	54.45	2490000
QQQLSPLNPL	44.55	1136.62	10	-0.2	569.317	46.29	16500000000
WQQQQLRPFNQLAIANPA	44.5	2122.11	18	1.4	1062.06	51.29	14500000
KILVDKEDEEEDGEAGDGDEDK	44.48	2434.05	22	1	609.52	17.54	5830000
ISKDEYDESGPA	44.44	1309.57	12	0.9	655.792	17.28	7070000
GFFPVDH	44.43	817.376	7	-0.6	409.695	31.52	11600000
LREQFPGAND	44.43	1145.55	10	-0.4	573.78	20.8	81300000
RVVAEAEAGTVT	44.41	1201.63	12	0.7	601.823	17.16	13100000
SPLAHLQQQALVA	44.39	1374.76	13	-4.5	688.385	35.43	79600000
GPDAGVDYKDNQ	44.38	1277.55	12	2.2	639.785	15.28	2500000
RLQQALAASILSSPAM	44.36	1655.9	16	-1.6	828.957	51.22	5960000
VIIMNHPGQIGNGYAPV	44.35	1778.91	17	0.3	890.464	41.25	540000000
ALTSPIAHWQQQQLV	44.35	1718.91	15	0.1	860.463	48.83	29900000
ADSAGNVVIGGIMEH	44.28	1468.7	15	-0.6	735.356	41.26	8350000
TLQSIMAQQHQVLSPF	44.26	1826.93	16	-2.7	914.472	54.27	104000000
MNHPGQIGNGYAPV	44.21	1453.68	14	0.2	727.846	26.09	182000000
SDRPPTSDGPPAAGGPA	44.18	1548.72	17	1	775.366	17.39	10400000
FGALVDSLKPR	44.15	1201.68	11	-1.4	401.567	28.51	2130000
QSLGLDFPK	44.14	1003.53	9	-0.2	502.774	35.42	30700000
LPQQSALLQQQSLSHLTVQSITAQ	44.12	2618.4	24	0.8	1310.21	53.42	106000000
ALSQQQSLAHVT	44.1	1281.67	12	0.3	641.841	20.14	6580000
IISSIEQKEEGRGNED	44.02	1802.86	16	1.7	902.441	17.56	3220000
QQQQQLLVNPI	44.02	1307.72	11	-0.2	654.867	46.5	117000000
AGDVFWIPR	44	1059.55	9	2.4	530.784	46.7	146000000
SLSHLTVQSITAQ	44	1383.74	13	-0.9	692.875	33.4	1560000000
LDDGESPEMAGPR	43.99	1372.59	13	-0.3	687.303	20.69	44700000
NAFSQQQQLLPFNQ	43.98	1661.82	14	-1.4	831.914	54.33	188000000
LNVKPDQRPEV	43.98	1293.7	11	-0.6	432.242	18.85	23200000
HDFGSEILPK	43.94	1141.58	10	0.5	571.796	24.35	28500000
WPLPPFGESHGP	43.93	1319.63	12	-0.8	660.822	51.76	249000000
ASPVTQLQQQQLVSSV	43.91	1711.91	16	-0.7	856.962	49.37	82700000
GMHQQPPYGGV	43.9	1169.53	11	-1.5	585.771	19.3	7420000
LGHNETINEGV	43.88	1181.57	11	0.6	591.791	18.89	7950000
WPLPPFGESHGPY	43.87	1482.69	13	0.9	742.355	54.37	269000000
QSIMAQQHQVLSPFS	43.81	1699.84	15	-0.4	850.925	42.57	107000000
YWQQQQLRPFNQLA	43.78	1818.92	14	0	910.466	48.13	3340000
EDRPAGGQGGPRPGGPGPAGA	43.78	1856.89	21	2.6	619.971	14.56	5570000
AHLQQQALVASVFNQVPLANP	43.75	2244.2	21	0.7	1123.11	56.06	3400000
SMMLQQPWTSPLQQ	43.74	1673.79	14	2.8	837.905	56.15	2240000
LQQQQLLPFNQ	43.74	1355.72	11	-0.3	678.867	49.88	133000000
ALANPYLQQPF	43.68	1260.65	11	-1.3	631.332	53.73	16116000000
RVNPLAAMNAAA	43.66	1197.63	12	0.3	599.822	29.59	12300000
YRLQQALAASILSSPA	43.65	1687.93	16	0.7	844.971	53.02	23200000
LQQQLSPLNPL	43.62	1249.7	11	-0.1	625.859	49.91	1920000000
LSLGVAGSQPGIEGEEIAPL	43.59	1936.02	20	7.6	969.022	56.2	50200000
VSPRPDDVGEE	43.55	1198.55	11	1.6	600.282	15.37	743000
AHWQQQQLVSSVF	43.53	1556.77	13	0.4	779.394	47.77	9380000
FAEHGTDLGSS	43.51	1119.48	11	-0.1	560.749	17.82	7580000
RAQADIGGVPNPIPPPTQPPVPE	43.51	2346.23	23	0.8	1174.12	47.17	4300000
RLQQALAASILPSSAM	43.5	1655.9	16	0.9	828.96	49.34	311000000
AFWQQQQLVN	43.49	1260.63	10	-1.2	631.319	48.92	87000000
LTGITGIVNGM	43.48	1074.57	11	-0.3	538.294	53.46	123000000
HHEVEVEYPDGRPT	43.42	1663.76	14	1.3	555.594	17.29	1990000
AFLQQPIVGSA	43.37	1129.61	11	0.2	565.814	46.15	5930000000
FIDEIDSIAPK	43.34	1246.64	11	-0.6	624.329	42.04	72800000
VEAPAEEEAPKPKP	43.34	1490.76	14	1.1	497.928	16.54	1140000
GGGEGGEGYLPFPP	43.34	1332.6	14	-0.5	667.306	54.44	448000000
HEFLPDGN	43.33	927.409	8	-0.9	464.711	21.73	36500000
SVGEGVTDVAPGDH	43.22	1338.61	14	0.3	670.31	22.37	9740000
ALASGVGDWH	43.18	1011.48	10	-0.3	506.746	26.93	4800000
GFITMEPR	43.18	949.469	8	-1.1	475.741	26.15	394000000
GGTHGQGVGGGGRPV	43.18	1291.64	15	0.6	646.827	18.51	301000
LSLGVAGSQPGIE	43.17	1226.65	13	0.3	614.333	45	358000000
NQVPLANPYLQQPF	43.17	1627.84	14	1.8	814.927	56.12	4170000
FSPEHFSPL	43.17	1059.5	9	-0.4	530.758	38.83	779000000
RQQLLPFNQ	43.13	1142.62	9	0.5	572.317	31.19	54400000
LVEPQHQYNA	43.09	1197.58	10	1.8	599.797	17.59	97100000
HHIMAGADL	43.05	963.46	9	0.7	482.737	17.6	34500000
DWAGGLGSSTPSLRPTAPH	43.04	1905.93	19	1.6	636.319	39.92	52000000
SPFAQLQQQQLVSSV	42.97	1658.86	15	0.4	830.439	53.82	66900000
ADLSDKPFFPG	42.93	1192.58	11	-0.1	597.295	40.66	86200000
TAAWQQQQLLPNV	42.88	1495.78	13	0.1	748.896	54.2	123000000
HAPVPADPLPK	42.8	1140.63	11	-0.6	571.322	19.03	14400000
AAFLQQPIIGS	42.78	1143.63	11	-0.3	572.822	51.49	38700000
AQQHQVLSPFS	42.72	1240.62	11	-0.6	621.317	25.92	313000000
AWRPQGL	42.71	826.445	7	-0.5	414.23	23.01	65800000
LFSPEHFSPL	42.71	1172.59	10	0	587.301	48.35	28700000
SPLAHLQQQA	42.7	1091.57	10	-0.4	546.793	19.87	234000000
KVVFVPDYNVS	42.69	1265.67	11	-0.9	633.84	38.23	0
IDGYEKPVE	42.69	1048.51	9	0.7	525.261	18.18	2910000
LANPYLQQPFIGGA	42.68	1487.78	14	-0.3	744.896	55.18	210000000
FSNIEVNPRPD	42.62	1286.63	11	-0.7	644.32	25.38	35300000
RTETSPEDVGGM	42.61	1277.56	12	0.2	639.785	19.54	8090000
SFTSEFPH	42.6	950.413	8	1.2	476.214	28.73	151000000
KLDFIGVNH	42.59	1041.56	9	0.9	521.788	23.14	6590000
GNPVGGVGHGTTGTGTGGMGTG	42.59	1827.82	22	0	914.916	20.03	22400000
LQQALAASILPSSA	42.57	1368.76	14	0.2	685.388	50.98	79000000
ILDADVTDSVIGE	42.54	1345.66	13	-2.3	673.836	53.31	21700000
AIPQLMEEDVQ(+.98)IVLLGTGKKKFER	42.54	2742.5	24	5.6	549.51	53.95	4350000
VIEEELGAPR	42.52	1111.59	10	-0.1	556.801	22.23	46300000
LSLGVAGSQPGIEGEEIAP	42.47	1822.93	19	-1	912.472	53.86	333000000
VNPLAAMNA	42.42	899.453	9	-1.5	450.733	38.73	35400000
LTGITGIVNGMDVSEWDPSKDK	42.42	2361.15	22	0.6	788.058	54.33	39900000
YWQQQQLRP	42.4	1245.63	9	-0.4	623.82	24.12	154000000
AQLQQQQLVSSV	42.4	1327.71	12	-0.7	664.862	35.22	370000000
QQQQFLPNV	42.4	1100.56	9	-0.2	551.288	43.22	2170000000
ALDRPSTPTIDR	42.38	1340.7	12	-0.8	447.909	19.51	5390000
GRFEEFFPIGGESPE	42.35	1696.77	15	0.4	849.394	54.14	110000000
HQQPPYGGVP	42.35	1078.52	10	0	540.267	20.13	2790000000
QHQVLSPFS	42.27	1041.52	9	0.1	521.769	26.01	201000000
WENPKDPDEV	42.26	1227.54	10	-1.2	614.777	22.7	19100000
IGMESPGIHET	42.21	1169.54	11	-0.1	585.777	22.4	20500000
EHPIVQSYRLQQALAASILPSSA	42.2	2478.32	23	1.7	1240.17	53.89	18100000
LKDDNPLFGSS	42.18	1191.58	11	0.6	596.796	31.06	8330000
SATAWNPVPR	42.18	1097.56	10	-0.6	549.788	23.17	12400000
FFATPPVHGS	42.17	1058.52	10	-1.2	530.266	25.47	38200000
EAMPPLEEGPYG	42.17	1288.56	12	0	645.289	46.71	346000000
NQLHDFGSEILP	42.16	1368.67	12	-2.2	685.339	47.96	110000000
RINPLATMNPA	42.14	1196.63	11	0.6	599.324	28.69	97800000
FAFSDYPELNLPER	42.13	1696.81	14	1.8	849.414	54.74	12600000
SHINIVVIGH	42.12	1087.61	10	-0.5	544.814	22.1	2480000
QMVQQQQPP	42.12	1082.52	9	1.4	542.267	17.85	4650000
PPLHEFLPDGNVEDI	42.07	1690.82	15	1.8	846.419	53.15	12100000
PQYLPHVT	42.05	953.497	8	-1.6	477.755	36.03	18900000
PGLTDTEKPR	42.04	1112.58	10	0.4	557.299	19.36	3890000
HVVQDLKPDI	42	1162.63	10	-0.4	582.324	21.59	90000000
TYPHQQPPILT	41.97	1293.67	11	-0.3	647.843	23.88	168000000
NAMIGGALSGALISGATNNH	41.97	1867.92	20	-0.9	934.967	51.58	18000000
KIYGPDAGVD	41.96	1033.51	10	0.4	517.761	19.16	54000000
TGGLGDVLGGLPPA	41.96	1222.66	14	0	612.335	57.95	426000000
AYWQHQQLLPFNQLAVENA	41.95	2269.13	19	0.6	1135.57	55.91	16700000
AYWQQQQLLPNV	41.93	1486.76	12	-0.8	744.385	55.81	42800000
MAQQHQVLSPF	41.92	1284.63	11	0.4	643.322	29.58	86400000
LRINPLATMNPA	41.92	1309.72	12	0.5	655.866	40.47	444000000
PGLTIGDTVPN	41.91	1082.56	11	0.5	542.288	39.78	191000000
QLLPNVFNQ	41.88	1071.57	9	0.4	536.793	54.64	35300000
SMMLQQPW	41.88	1019.46	8	-0.4	510.736	52.62	258000000
WQQQQFLPN	41.85	1187.57	9	-0.4	594.793	44.06	6710000000
HIVPDKPLPT	41.83	1115.63	10	0.7	558.825	19.21	11000000
FGSEILPR	41.82	917.497	8	0	459.756	26.74	8150000
VVDMPGLGTGDIK	41.82	1300.67	13	-0.1	651.342	36.92	3340000
AHLQQQALVASV	41.81	1263.69	12	0.3	632.854	25.76	19100000
SVLNQVGLANPITA	41.81	1395.77	14	-0.7	698.893	54.19	33800000
SPVTQLQQQQLVSSV	41.81	1640.87	15	0.1	821.444	48.39	306000000
TAIDIPPPR	41.81	978.55	9	-0.2	490.282	21.56	96500000
WQQQQLLPFNQ	41.8	1428.71	11	0.1	715.365	54.39	40100000
GFFPVDHV	41.79	916.444	8	-0.6	459.229	40.7	35200000
VFEAEPGNGRPGPGEK	41.77	1639.8	16	0.4	547.606	16.65	3050000
QQPPPQTYPH	41.75	1191.57	10	1.7	596.792	14.95	1480000
NPPHTHPR	41.74	954.478	8	-0.7	478.246	17.92	18700000
FVGAEMAPWS	41.71	1093.49	10	-0.7	547.752	53.57	97400000
LDDIGIDLPK	41.67	1097.6	10	0.1	549.806	42.26	38600000
TSPIAHWQQQQLVSSV	41.67	1807.92	16	-1.6	904.967	44.64	10900000
AQEAGAGGGGASTGGAGGG	41.66	1388.59	19	2.3	695.305	10.87	31500
LMSAEEKYPD	41.64	1181.53	10	-0.2	591.771	20.55	162000000
GDPDHLQDV	41.63	994.436	9	0.2	498.225	18.96	18400000
TLQSIMAQQH	41.63	1155.57	10	-0.4	578.792	24	30000000
LQQQSALLQQQYLAHLT	41.61	1982.06	17	-1.1	992.035	49.61	136000000
PAVVPPPPQQQPPHGS	41.59	1631.84	16	1.2	816.929	20.84	3710000
QQLPSMFNPM	41.58	1191.54	10	-0.1	596.778	54.36	353000000
AWQQQQLLPNV	41.57	1323.69	11	0	662.854	52.9	384000000
FKLEYVHP	41.56	1031.54	8	-0.1	516.779	27.15	9080000
LESVGAEVDNEK	41.56	1288.61	12	0.9	645.315	19.16	8660000
NHITAAYWQQQQLLPN	41.55	1923.96	16	0.2	962.987	48.18	41500000
FSDYPELNLPE	41.54	1322.6	11	-0.9	662.308	55.19	46300000
QQYWTPR	41.51	977.472	7	-0.7	489.743	20.94	45100000
FLPQQSALLQ(+.98)QQSLSHLTVQSITAQQQR	41.5	3178.67	28	4	1060.57	52.73	27000000
AVFPSIVGRP	41.5	1041.6	10	-0.4	521.806	36.37	85400000
PVGHPVVE	41.48	832.444	8	-0.5	417.229	20.06	5040000
FLQQPIIGSGL	41.47	1171.66	11	-0.2	586.837	53.86	36700000
VNPVAAMNPA	41.47	982.491	10	-0.4	492.252	30.91	55400000
LQQQSLSHLTVQSITAQQQ	41.46	2137.11	19	-0.5	1069.56	40.77	559000000
QQQQPPYGGGVQGQ	41.44	1470.69	14	1.7	736.351	20.17	57900000
IIIDSNNNPEH	41.43	1264.6	11	0.3	633.31	19.56	16800000
TPGHPENFETPGVE	41.39	1509.67	14	-0.2	755.844	25.65	18800000
KIGTMIEIPR	41.39	1156.66	10	-0.9	579.339	25.6	80400000
VEPGHLDQLLHPQ	41.38	1481.76	13	0	494.928	33.73	14600000
QAPPNLTLRPS	41.36	1192.66	11	0.1	597.336	23.05	46700000
NAYWQQQQLRPF	41.35	1577.77	12	0.4	789.895	46.16	233000000
IHDFIGDGYV	41.35	1134.53	10	-0.8	568.274	43.15	65600000
PSMFNPM	41.35	822.341	7	-1.1	412.177	42.56	44100000
KFEFYDPQ	41.33	1072.49	8	1.2	537.251	34.33	102000000
TLALDGNTSPH	41.28	1124.55	11	-0.9	563.28	19.68	12900000
DVSEWDPSKD	41.27	1176.49	10	0.9	589.255	31.19	37800000
VGYIYKDEL	41.26	1098.56	9	-0.4	550.287	31.43	20700000
VSFDVAIH	41.24	886.455	8	-0.9	444.234	34.52	308000000
MALDRPSTPT	41.24	1087.53	10	0.1	544.774	20.38	111000000
RLSLVEGIIHG	41.22	1192.69	11	-1.7	398.571	36.58	38800000
PPPQTYPH	41.21	935.45	8	1.5	468.733	14.43	4160000
AFLQQPIIGS	41.15	1072.59	10	-0.8	537.303	49.75	336000000
AVVKFNAALAHHIMAGAD	41.13	1834.95	18	0.2	459.745	34.6	0
LREQFPGAN	41.12	1030.52	9	-0.4	516.267	19.67	36700000
ILVDKEDEEEDGEAGDGDED	41.1	2177.86	20	-0.9	1089.94	29.53	111000000
NDLIHGLYPE	41.09	1169.57	10	-0.9	585.793	42.62	316000000
AHWQQQQLV	41.07	1136.57	9	-0.2	569.293	22.59	144000000
SSPAMSLQQQSALWQHQ	41.04	1925.91	17	0.9	963.961	43.07	28400000
QQRLLPFNQLA	41.01	1326.74	11	-0.4	664.377	45.56	264000000
ALLQQQSLSHL	41.01	1236.68	11	0.2	619.349	33.35	309000000
MFLPQQSALLQQQSLSHLT	41	2169.13	19	0	724.049	54.34	101000000
AQQHQVLSPF	40.98	1153.59	10	-0.6	577.801	26.12	175000000
IGSMIEVPR	40.98	1000.54	9	0.7	501.276	27.57	16500000
LPVHDGGVGFD	40.97	1111.53	11	0	556.772	28.72	127000000
QQLSPLNPL	40.94	1008.56	9	0	505.287	45.29	903000000
RIIGATRPW	40.94	1068.62	9	-0.8	535.317	21.42	12700000
RDELTLEGIK	40.93	1172.64	10	-0.5	587.327	23.13	16400000
AFLQQPIVGS	40.9	1058.58	10	-0.4	530.295	44.97	4070000000
QAPPNLTLRPSA	40.9	1263.69	12	-1	632.853	24.73	72600000
INPLAAMNPT	40.87	1040.53	10	0.7	521.274	46.6	416000000
ANHITAAYWQQQ(+.98)QLLPN	40.87	1995.98	17	8.5	999.006	48.08	1300000
TAAYWQQQQFLPN	40.81	1593.76	13	-0.4	797.886	53.55	52400000
QQPPYGGGVQGQ	40.8	1214.57	12	-0.2	608.291	19.4	174000000
TVQSITAQQQ	40.77	1102.56	10	0.5	552.288	17.33	6550000
QQHQVLSPF	40.75	1082.55	9	-0.9	542.282	26.19	8230000
HHIM(+15.99)AGADL	40.74	979.455	9	2	490.736	12.78	2530000
KFEFYDPQTPF	40.73	1417.66	11	0.2	709.835	53.64	17500000
QQQQLVSSV	40.72	1015.53	9	0.5	508.772	22.98	14000000
KGAGVDIDAGTE	40.71	1131.54	12	0.3	566.778	18.01	4360000
FDLSGIPPAPR	40.67	1168.62	11	0	585.319	40.63	159000000
YRPGTVALREIR	40.65	1429.82	12	-0.2	477.612	19.38	4490000
YRPGTVAIREIR	40.65	1429.82	12	-0.2	477.612	19.38	4490000
ALANPYLQQPFIGGA	40.63	1558.81	15	-0.1	780.414	55.8	55600000
IAAVLPDLDIK	40.61	1166.69	11	0.1	584.353	48.66	9040000
LGYGNPIVQP	40.61	1056.56	10	0.1	529.288	41.47	2220000000
HHEVEVEYPDGRPTEK	40.6	1920.9	16	1.2	481.232	14.86	858000
IIMNHPGQIGNGYAPV	40.58	1679.85	16	-1.4	840.929	36.67	216000000
DLVGSRDPVEQ	40.56	1213.59	11	0.3	607.804	24.67	2880000
QQQLSPLNPLA	40.55	1207.66	11	0.2	604.835	46.8	261000000
ILQQQLSPLNPL	40.53	1362.79	12	-0.5	682.4	54.02	447000000
NNIATMLPNV	40.49	1085.55	10	-0.7	543.784	52.35	147000000
VGAEMAPWS	40.48	946.422	9	-1.3	474.218	41.6	222000000
QLGAAVPGQQ	40.48	967.509	10	-0.8	484.761	21.7	23900000
PQYLPHLT	40.45	967.513	8	-1.2	484.763	42.04	653000000
DLSGIPPAPR	40.44	1021.56	10	-0.2	511.785	25.98	21500000
TGITGIVNGM	40.42	961.49	10	0.8	481.753	47.45	21200000
SWTGTIIGPH	40.42	1067.54	10	0.4	534.778	34.29	18200000
LAHLTLQSIMAQQHQ(+.98)VLSP	40.41	2115.11	19	10	706.053	51.56	0
IMIKPDGV	40.39	871.484	8	0.3	436.749	22.98	339000000
SESHDQALVGDKTIA	40.38	1569.76	15	1.1	785.89	18.85	9220000
TTLPENFRPH	40.36	1210.61	10	-0.6	404.543	21.07	4160000
NAYWQQQQLRPFNQ	40.35	1819.88	14	1.5	910.946	42.53	2260000
LPAFSPDER	40.33	1030.51	9	0.2	516.261	24.81	3400000
VVPVGHPVVE	40.32	1030.58	10	-0.3	516.298	19.95	97600000
RLQQALAASILSSPAMSLQQQ	40.32	2240.19	21	3.2	1121.11	54.55	2590000
VASVFNQVPLANPY	40.31	1517.79	14	-0.2	759.901	55.81	22300000
SSPAMSLQQQSALWQHQSLASPAA	40.31	2523.22	24	-0.3	1262.62	50.52	58200000
FRQQPIIGSA	40.28	1115.61	10	-0.7	558.811	21.5	27400000
LQQALAASILSSPA	40.24	1368.76	14	0.6	685.388	52.08	97800000
QQQQLRPF	40.21	1043.55	8	0.2	522.783	21.35	31900000
VWFPQPAPK	40.2	1068.58	9	0.4	535.295	30.67	24400000
TLVDGFVIRNPA	40.19	1300.71	12	-1.1	651.364	46.58	6010000
VEDIGVVKPT	40.12	1055.59	10	0.4	528.801	21.34	14700000
MGNEFGHPE	40.11	1016.4	9	2	509.209	17.7	3420000
AYWQQQQLLP	40.11	1273.65	10	-1.6	637.829	53.52	281000000
SGPGLLFPK	40.11	914.523	9	-1	458.268	29.07	7990000
IDVDVPVVGGH	40.09	1105.58	11	-0.4	553.795	39.44	0
SALLQQQSLSHLTVQSITAQQQR	40.08	2564.37	23	-0.8	855.795	44.59	5360000
VGEGVTDVAPGDHVLPV	40.03	1659.85	17	2	830.932	45.67	46000000
LVEPQHQYNAIYTMVY	40.02	1967.95	16	-0.3	984.98	51.69	72300000
AIGTEIEWHPG	40.01	1208.58	11	-0.1	605.298	36.38	69200000
QQQQLLPNV	39.99	1066.58	9	-0.4	534.296	39.45	1280000000
NLEDNVDDEK	39.98	1189.51	10	1.3	595.763	17.1	7050000
SPAAFLQQPIVGS	39.97	1313.7	13	-1.2	657.855	52.36	11500000
NQVGLANPITA	39.96	1096.59	11	0.6	549.302	37.09	9660000
IKQQGLDITPK	39.94	1239.72	11	0	414.247	17.83	2500000
WQ(+.98)QQQFLPNV	39.93	1287.62	10	-1.8	644.818	54.69	28800000
REWGKEEEEEAE	39.92	1519.64	12	4.5	760.832	15.61	2100000
LEIVDPQPPGKPR	39.92	1444.8	13	-0.6	482.608	22.66	8560000
FLPQQSALLQQQSLSHLTVQSITAQQQRILSP	39.9	3587.94	32	4.9	1196.99	56.03	5500000
SAEEKYPDK	39.88	1065.5	9	2.8	533.758	8.94	41100
LFPQIHLPQ	39.88	1091.61	9	-0.1	546.814	48.06	774000000
VAIVDVDEH	39.8	995.492	9	0.1	498.753	22.92	74200000
DKLGGAFAPKPS	39.8	1186.63	12	0	594.324	19.26	5010000
SPVAQLQQQ	39.8	997.519	9	-0.8	499.767	20.29	6720000
LQQALAASILSSPAV	39.78	1467.83	15	0	734.922	55.34	49600000
DEEEDGEAGDGDEDK	39.77	1608.55	15	3.4	805.287	11.72	156000
LQQQQLLPLNP	39.77	1290.73	11	-1.5	646.371	49.38	107000000
LQQQTLLPFNQ	39.75	1328.71	11	-0.1	665.362	51.86	191000000
LQQ(+.98)PWTSPLQQYWTPR	39.75	2029.01	16	7.3	1015.52	57.73	0
VQQQQPPYGGGVQGQ	39.74	1569.75	15	-0.5	785.884	21.49	306000000
QQLLPFNQ	39.73	986.519	8	-0.3	494.266	45.96	23100000
IEATKEPGLT	39.71	1057.57	10	0.2	529.79	18.26	1550000
QSALLQQQSLSHLTVQSITAQQQ	39.71	2536.32	23	-1.8	1269.17	51.03	11500000
QLLPNVFN	39.71	943.513	8	0	472.764	54.4	25700000
ATM(+15.99)LPNVFNQ	39.68	1149.55	10	-0.2	575.782	47.57	15000000
KEEVKVEVEDGN	39.65	1373.67	12	1.1	687.842	14.19	1420000
VNNIATMLPN	39.65	1085.55	10	0	543.784	43.51	425000000
FLQQPIVGSA	39.65	1058.58	10	-0.1	530.295	37.93	317000000
LNIGVINQEK	39.59	1126.63	10	-0.6	564.324	25.9	81500000
QMVQQQQPPYGGGVQGQ	39.58	1828.85	17	-0.1	915.433	28.95	1180000000
AFWQQQQLV	39.58	1146.58	9	-0.9	574.298	52.82	441000000
PSPPYVPPYTPPTPR	39.57	1664.86	15	-1.5	833.434	36.69	153000000
VALKPPEVQID	39.57	1207.68	11	2.2	604.849	35.93	10300000
YSNSDIEIH	39.55	1076.48	9	-0.9	539.245	20.4	28100000
GVIRPLEPE	39.47	1008.56	9	-0.3	505.287	22.76	6770000
ARVEAEVGTE	39.47	1059.52	10	1.8	530.768	13.9	2700000
WQQQQLVNQLALTSPAA	39.47	1894.99	17	-0.1	948.502	55.03	94300000
AFLQ(+.98)QPIVGSA	39.46	1130.6	11	0.9	566.306	48.92	14900000
AVGNPAAFWQQQQL	39.46	1556.77	14	-0.6	779.394	55.48	48400000
YWQQQQLLPNV	39.45	1415.72	11	0.3	708.867	54.55	230000000
AIHADIANGKVDD	39.43	1337.66	13	0.3	446.893	19.58	6600000
KVVFVPDYN	39.42	1079.57	9	0.3	540.79	31.27	39400000
KDAWDTSV	39.41	920.424	8	-0.4	461.219	22.83	88300000
HVTVQSITAQQQQYLPA	39.41	1910.98	17	-0.5	956.499	41.63	65900000
WEDVGTIK	39.39	946.476	8	-0.5	474.245	22.83	144000000
VSPRPDDVGEEVE	39.37	1426.66	13	0.1	714.336	22.67	66600000
DVSDNHLQGQLPA	39.37	1392.66	13	-0.5	697.339	28.9	55200000
FDLAGIPPAPR	39.35	1152.63	11	-0.4	577.322	40.9	17200000
VDLEVKPKPDNT	39.34	1353.71	12	0.3	677.864	18.1	1980000
LTAFHPEIE	39.3	1055.53	9	-0.3	528.771	29.2	59000000
GNPIVQPY	39.28	886.455	8	-0.4	444.235	29.22	699000000
LQQPIIGSGL	39.27	1024.59	10	0	513.303	43.88	256000000
YWQQQQFLPNV	39.26	1449.7	11	0.1	725.859	55.51	225000000
NGVYRPF	39.26	851.429	7	-0.3	426.722	22.9	16000000
WQQQQLLPFN	39.25	1300.66	10	0.8	651.336	55.27	10800000
FWSQATSIA	39.24	1009.49	9	-0.3	505.75	42.3	19600000
FGGVDDIK	39.24	849.423	8	-0.9	425.719	21.15	10100000
AQQHQVLSPFSR	39.23	1396.72	12	-0.3	466.581	20.24	7720000
FRVPTVDVS	39.21	1018.54	9	0	510.28	34.77	50200000
RIISSIEQKEEG	39.21	1387.73	12	0.8	694.873	17.14	1240000
LFPRPDPT	39.21	941.497	8	-1.2	471.755	21.71	165000000
SM(+15.99)MLQQPWTSPL	39.2	1433.67	12	-1.6	717.84	55.13	25400000
SAMFLPQQSALLQQQSLSHLT	39.2	2327.19	21	-2.8	1164.6	55.13	22600000
IMLDWDPK	39.18	1016.5	8	-1.2	509.257	40.62	116000000
AGLSDPNRPI	39.17	1038.55	10	-0.7	520.28	20.02	16600000
LVSGAIAGAVSR	39.15	1099.63	12	0.1	550.825	22.93	7400000
VPGMLEKPE	39.15	998.511	9	0.6	500.263	21.01	33900000
SGGAPGGGADEEGGVDDDH	39.14	1697.64	19	0.9	849.828	15.17	489000
IATMLPNV	39.12	857.468	8	-1.1	429.741	44.03	68900000
NQLALASPLAHLQQQA	39.12	1701.92	16	0.1	851.966	46.6	215000000
IEVRPGIVM	39.11	1012.57	9	-1.9	507.293	33.2	0
KILPWGPEA	39.06	1009.56	9	-0.1	505.787	39.76	12100000
SLSHLTVQSI	39.05	1083.59	10	-0.9	542.803	29.16	12100000
HGSLGFLPR	39.05	982.535	9	-1.6	492.274	21.78	8940000
ALASPLAHLQQQALVASV	39.03	1816.02	18	-0.4	909.017	53.31	10500000
MTLQQQQQLLVNPIA	38.98	1723.93	15	-1.4	862.971	54.67	21400000
LLSRPDVEHLPT	38.98	1375.75	12	-0.1	688.88	27.76	28500000
DLTGIPPAPR	38.97	1035.57	10	1.4	518.794	27.62	47400000
VNDLIHGLYPEA	38.95	1339.68	12	0.7	670.846	47.31	202000000
LGLPIRPDVPL	38.92	1188.72	11	0.8	595.369	51.52	27300000
VSNVFNQV	38.9	905.461	8	0.4	453.738	33.81	11400000
WQQQQLLPNV	38.9	1252.66	10	-0.4	627.335	51.74	2160000000
YSHLDIVGRPV	38.89	1254.67	11	-1.3	419.231	25.17	2120000
AFWQQQQLVNQLALTSPA	38.85	2042.06	18	3.2	1022.04	56.23	28300000
AVIVGTVTDDK	38.83	1116.6	11	-0.5	559.308	20.17	9080000
ALGYENPIVQSNRLQQA	38.81	1899.98	17	0.1	950.997	39.03	51200000
LAHLTLQ(+.98)SIMAQQHQVLSPFSR	38.81	2505.32	22	7.9	836.119	52.38	65100000
LLDPPLHEFLPDGNVED	38.8	1918.93	17	0.2	960.473	56.06	3740000
WHGHQPGKPDWSEGS	38.8	1703.74	15	0.6	568.922	17.35	11700000
AAGPRDEAALQFIQSA	38.78	1643.83	16	0.7	822.921	47.55	29300000
GHFDNEIDM	38.77	1076.42	9	-0.3	539.219	29.03	11600000
IMIKPDGVQ	38.77	999.542	9	-0.2	500.778	21.6	75600000
IGTMIEIPR	38.72	1028.57	9	0.2	515.292	34.16	1010000000
DYHGGGGYPGGGYPGGGGGYPG	38.71	1954.79	22	0.4	978.401	35.07	98600000
YHGMQEFD	38.68	1025.39	8	-0.1	513.703	21.32	85100000
KVIEEELGAPR	38.68	1239.68	11	-0.6	414.234	18.88	5940000
PGPGDKPM	38.66	797.374	8	-0.2	399.694	20.75	4510000
QQQLPSMFNPM	38.65	1319.6	11	1	660.808	54.47	48200000
HIVQDLRPE	38.65	1105.59	9	0.4	553.802	17	12300000
QM(+15.99)VQQQQPPYGGGVQGQ	38.64	1844.85	17	-1.3	923.43	24.06	73900000
QQQQFLPNVFN	38.63	1361.67	11	-0.2	681.843	55.15	45900000
QQQLLPLNPL	38.63	1162.67	10	0.4	582.343	55.57	11600000
LPQQSALLQQQSLSH	38.61	1676.88	15	-0.5	839.449	32.99	11400000
LADKLESEE	38.61	1032.5	9	1.4	517.257	17.04	2180000
QLLPLNPLA	38.61	977.591	9	0.5	489.803	56.12	1400000
ADLSDKPFFPGLVE	38.6	1533.77	14	-0.3	767.893	54.9	141000000
YLYYDLLPK	38.59	1186.63	9	-0.7	594.321	52.39	8420000
QQQQQLPFNPL	38.55	1339.69	11	0	670.851	52.26	328000000
LQSIMAQQHQVLSPFS	38.54	1812.92	16	0.1	907.467	48.84	39000000
QQPPYGGGVQG	38.53	1086.51	11	-0.2	544.262	19.46	71900000
YDQYKDAWDTS	38.51	1390.57	11	-1	696.29	31.29	40100000
LDVPVKVPY	38.47	1028.59	9	1.8	515.303	41.56	23800000
FNKPDSEIVDH	38.4	1299.61	11	-1	434.21	18.76	6310000
FLQQPIIGSG	38.37	1058.58	10	-0.5	530.295	41.65	62600000
LAVSDEPHV	38.36	965.482	9	0.7	483.748	22.11	49100000
SMMLQ(+.98)QPWTLPFQQYWTPR	38.35	2438.16	19	6.8	1220.09	58.33	0
GVKDEGLVVAPGQGPEG	38.32	1607.82	17	0.1	804.915	29.13	101000000
YPRPPKPDAP	38.32	1136.6	10	-0.2	379.873	18.43	84300000
RLQQALAASILSSPAV	38.31	1623.93	16	0	812.973	49.79	274000000
GDIFVFPR	38.28	949.502	8	0.5	475.759	43.69	5660000
WTPRMMPF	38.28	1064.49	8	-1.2	533.253	49.16	5850000
RVNPVAAMNPA	38.27	1138.59	11	-0.7	570.303	21.45	59300000
QQQQLLPNVFN	38.27	1327.69	11	-0.3	664.851	54.12	61500000
NVVLDEFGTPK	38.27	1217.63	11	-0.1	609.822	36.54	23500000
VNVPVVGGH	38.23	876.482	9	0	439.248	21.94	5150000
LNQVGLANPI	38.21	1037.59	10	0	519.801	40.8	111000000
FSHPADFTPV	38.18	1116.52	10	0.4	559.269	30.53	15300000
LDDGESPEM(+15.99)AGPR	38.17	1388.59	13	2.6	695.303	16.35	3540000
VETGVIKPGM	38.16	1029.55	10	-0.7	515.783	21.65	295000000
VETGVLKPGM	38.16	1029.55	10	-0.7	515.783	21.65	295000000
VIIM(+15.99)NHPGQIGNG	38.14	1364.69	13	-1.2	683.35	20.06	9440000
FLQQPIVGS	38.13	987.539	9	-0.5	494.776	36.81	727000000
AYLQQQQLLPNV	38.1	1413.76	12	-0.4	707.888	52.86	436000000
IIEEGPVTVAPR	38.1	1279.71	12	-0.5	640.864	26.1	6300000
NHPGQIGNGYAPV	38.06	1322.64	13	-0.6	662.325	22.53	489000000
VPVLETPDGAV	38.06	1095.58	11	0	548.798	45.78	21600000
NQLALANPITA	38.05	1124.62	11	0	563.317	45.25	22000000
AHGLAPEIPE	38.05	1032.52	10	0.2	517.269	25.16	19600000
VSNVFNQVALANPY	38.05	1534.78	14	0.2	768.396	55.39	18400000
INPLATMNPA	38.02	1040.53	10	2.6	521.275	41.37	10500000
KLFPDGFET	38.02	1052.52	9	0	527.266	41.09	111000000
VTVDKDAPIN	38.02	1070.56	10	1.8	536.289	17.54	2460000
ALDRPSTPTID	37.99	1184.6	11	2.8	593.311	23.73	561000000
HNTGPSLVPGVIV	37.98	1288.71	13	0	645.364	41.38	131000000
FYRDPEEA	37.95	1025.45	8	0	513.73	17.92	5170000
AQLQQQQLVSSVLNQVGLANPI	37.91	2347.29	22	3.6	1174.65	56.3	96800000
WLFEEH	37.9	859.386	6	-0.8	430.7	37.34	164000000
DLTEEDLIEK	37.9	1203.59	10	-0.8	602.8	37.46	10900000
LGNIVEGNTQLPI	37.89	1366.75	13	-0.4	684.38	53.52	21400000
MLQQ(+.98)PWTSPLQQYWTPR	37.89	2160.05	17	9.4	1081.04	59.27	0
IGLGTAVQGPRPDA	37.87	1350.73	14	0	676.37	28.16	15000000
QHQSLASPA	37.86	937.462	9	1.7	469.739	11.76	103000
AQLQQQQLVSSVLNQ	37.85	1682.9	15	1.7	842.456	51.7	47500000
FGAPYDGVH	37.85	961.429	9	-1.6	481.721	22.66	6230000
KADEPPKVPIPTPL	37.82	1500.86	14	-0.3	751.435	34.72	21400000
ELGLPIRPDVPL	37.81	1317.77	12	-0.3	659.89	53.81	101000000
AIRPRPGVWD	37.8	1165.64	10	-0.5	389.552	19.74	4140000
IMAQQHQVLSPFS	37.78	1484.74	13	-0.3	743.379	35.78	27500000
NAFDDEKRPYLPK	37.78	1591.8	13	-0.1	531.607	21.52	16000000
RLQQALAASILPSS	37.77	1453.83	14	1.9	727.921	41.82	122000000
RLTGITGIVNG	37.73	1099.63	11	1.6	550.826	29.26	7270000
ALEAVDPSHPQGT	37.73	1320.63	13	-0.1	661.323	21.34	20100000
GGPAEIIVDGV	37.72	1025.54	11	0.5	513.777	51.9	4890000
EISDDEDEEDKKDEEGKVE	37.72	2236.93	19	2.7	746.654	14.96	14500000
PPHTHPR	37.71	840.435	7	0.8	421.225	17.9	15200000
VIVPDFQPR	37.71	1069.59	9	-0.1	535.803	33.67	57800000
QQQFLPNV	37.69	972.503	8	-0.2	487.259	42.46	73300000
ISDDFDGELFPR	37.69	1409.65	12	0.8	705.831	50.6	11000000
HIVTKPGQLPVE	37.67	1316.75	12	-0.6	659.38	20.26	5300000
FLKDNIEAD	37.66	1063.52	9	-0.5	532.766	22.2	13900000
IISSIEQKEEGR	37.66	1387.73	12	0.8	463.584	16.48	544000
QQQSLSHLTVQSITAQQ	37.66	1895.97	17	1.5	948.994	36.82	43200000
GLPASPGAAVGQ	37.6	1023.53	12	0.2	512.775	28.2	28600000
QQQQLPSMFNPM	37.6	1447.66	12	-0.5	724.836	54.35	73500000
IINHPEIMSPL	37.57	1262.67	11	-0.5	632.342	39.81	14300000
REDRPAGGQGGPRPGGPGPAGA	37.57	2012.99	22	1.4	504.255	12.86	2170000
LPQQSALLQQQSLSHLTVQSIT	37.51	2419.31	22	1.6	1210.66	52.97	37300000
MMLQQPW	37.5	932.425	7	-1	467.219	51.14	16400000
LRVNPLAAMNA	37.47	1168.64	11	1	585.327	37.01	22400000
ELPQQLRPG	37.45	1036.57	9	-0.4	519.29	21.3	48800000
SLDAATGKPNRPDVD	37.43	1554.76	15	1.7	519.263	16.94	2190000
QQFLPNV	37.43	844.444	7	0	423.229	42.68	41700000
GRFEEFFPIGGE	37.43	1383.65	12	-0.6	692.83	54.31	2780000
AYWQHQQLLPFNQL	37.4	1784.9	14	0.3	893.457	55.3	21300000
ALLQQQSLSH	37.36	1123.6	10	-0.7	562.806	21.13	40200000
AYLQQQTLLP	37.35	1173.64	10	0.3	587.827	49.24	737000000
LFGATPPVSTDV	37.34	1202.62	12	-0.4	602.316	49.36	48800000
LLHEAGLPEGV	37.34	1133.61	11	0.6	567.812	33.89	11100000
VETFPGVNT	37.33	962.471	9	-0.7	482.242	36.09	33900000
SLSHLTVQSITAQQQRILSPLNQLA	37.32	2745.51	25	2	916.18	54.62	17900000
AGIIEADRVLTVSP	37.31	1439.8	14	0.2	720.907	46.43	31600000
LQQQQLLPFN	37.3	1227.66	10	-0.6	614.837	51.26	9310000
VLDVEDIPR	37.29	1054.57	9	-0.4	528.29	34.82	16100000
VVPVGHPVVEV	37.29	1129.65	11	0.6	565.832	27.5	19800000
QHQVLSPF	37.28	954.492	8	-1.1	478.253	26.15	302000000
LQQQSALLQQQYLAH	37.27	1767.93	15	-0.2	884.971	37.11	20700000
FYRDPEEAKEEEE	37.27	1669.71	13	-0.8	557.577	18.39	1950000
YDRTPEEI	37.27	1021.47	8	-0.3	511.743	19.24	9780000
ILRDEGPSEL	37.26	1127.58	10	0.7	564.799	23.39	6610000
IGMESPGIH	37.26	939.448	9	-4.1	470.73	21.4	4670000
MPPLEEGPY	37.19	1031.46	9	-0.4	516.739	42.19	63000000
QLLPFNQLA	37.19	1042.58	9	-0.7	522.297	55.34	24600000
TIPQYLPH	37.17	967.513	8	0.5	484.764	28.15	652000000
LGFITMEPR	37.17	1062.55	9	0.6	532.284	37.68	1960000
YVVPEGIEK	37.17	1032.55	9	-0.5	517.282	23.81	35500000
QQ(+.98)QLSPLNPL	37.16	1137.6	10	-1.6	569.808	48.91	75400000
LLPGDLSYADSIQPR	37.15	1643.85	15	2.7	822.935	48.21	18500000
FQNVTIPK	37.14	945.528	8	-0.1	473.771	21.95	40200000
PLNFPAGPM(+15.99)	37.13	958.458	9	1.2	480.237	39.89	0
AFLQQPIVG	37.12	971.544	9	0.6	486.78	45.94	2090000000
RINPLATMNPAA	37.11	1267.67	12	0.4	634.843	31.18	87200000
ADADFVRPE	37.1	1018.47	9	-0.3	510.243	20.66	6120000
YELQHAALGA	37.1	1071.53	10	0.3	536.775	24.81	0
SVFNQVPL	37.04	902.486	8	-0.6	452.25	49.95	1050000000
TLLPFNQLA	37.03	1015.57	9	0.6	508.793	55.85	6030000
PMATVIPPM	37.02	955.487	9	0.9	478.751	47.84	14300000
VVDSMTDNLRPT	37.01	1346.65	12	-1.1	674.332	25.96	9900000
NAYWQQQQLRPFNQLA	37.01	2004	16	1.3	1003.01	50.97	8900000
VTVEKDAYDNV	36.99	1251.6	11	0.6	626.807	22.15	17800000
DGNVVLAPANPR	36.99	1221.65	12	-0.7	611.83	21.82	7980000
DFAPGGQNPPHTHP	36.99	1470.66	14	-0.6	491.228	18.08	95700000
NQVALANPYLQQPF	36.97	1601.82	14	0.4	801.918	55.77	90100000
YEVKDEVGV	36.95	1036.51	9	0.3	519.261	23.96	4460000
AHWQQQQLVSSVFNQV	36.95	1897.94	16	0.5	949.98	53.05	27100000
FPIGGESPES	36.95	1018.46	10	-0.9	510.237	31.88	248000000
MYPRPPKPDAP	36.93	1267.64	11	-0.7	423.553	19.27	60000000
YWQHQQLLPFNQLAVENA	36.91	2198.09	18	1.8	1100.05	55.17	6350000
FLKDNIEADQ	36.91	1191.58	10	0.3	596.796	22.42	9470000
YWQQQQLRPFNQLAIANPA	36.9	2285.17	19	4.9	1143.6	53.23	8400000
MSLQQQSALWQHQS	36.9	1670.78	14	0.4	836.399	35.63	14500000
ALASGILAPSPV	36.87	1094.63	12	-0.1	548.324	48.99	2310000000
ALLQQQSLSHLTVQSIT	36.85	1866.02	17	0.7	934.019	49.71	31300000
SLSHLTVQSITA	36.85	1255.68	12	1.8	628.847	32.54	60300000
NVETFPGVNT	36.84	1076.51	10	0.3	539.264	37.01	93800000
GYWEDVGTIK	36.84	1166.56	10	0	584.288	38.5	69800000
AMGRFASPASM	36.83	1124.51	11	-1	563.262	25.3	0
FPGGAIAMPK	36.81	987.521	10	0.3	494.768	29.29	5040000
FATPYPLPK	36.81	1032.56	9	-1	517.289	33.18	12500000
ALGYENPIVQSNRLQQAL	36.76	2013.06	18	0.2	1007.54	50.82	0
FPQIHLPQ	36.75	978.529	8	-2.1	490.271	39.62	18800000
TSDLTEDGAEEGKEAPK	36.74	1775.81	17	1.6	592.943	16.25	1320000
VVVNASVESWLPMPR	36.74	1682.88	15	1.5	842.449	55.23	12600000
NQVPLANPYLQQPFIGGA	36.72	1926	18	3.2	964.01	56.18	480000
EDIGVVKPT	36.72	956.518	9	0.2	479.266	19.14	3710000
PLNFPAGPM	36.64	942.463	9	-0.6	472.239	50.03	44400000
SLLDQRPT	36.64	928.498	8	0.1	465.256	21.24	41900000
LQQPFIGGAI	36.64	1042.58	10	-0.6	522.298	50.74	495000000
LGDPQRPL	36.62	894.492	8	-1.3	448.253	18.79	73300000
MDVISIPK	36.59	901.494	8	-1.9	451.754	30.99	64800000
MFLPQQS	36.59	849.405	7	-0.2	425.71	32.31	76500000
LQQPWTSPL	36.55	1068.56	9	-0.5	535.287	50.95	5030000000
NAFSQQQQLLP	36.53	1272.65	11	0.9	637.331	47.47	1730000000
RQQPIIGSAI	36.52	1081.62	10	-0.5	541.819	23.05	56600000
LASPVAQLQQQQLVSNV	36.51	1821.99	17	1.4	912.006	53.15	25700000
WQQQQLV	36.51	928.477	7	1.2	465.246	31.05	9480000
AHGLAPEIPED	36.51	1147.55	11	-0.9	574.782	26.4	69100000
HLTVQSITA	36.49	968.529	9	0.2	485.272	21.98	27900000
VFIPQGSLA	36.48	930.518	9	-0.4	466.266	41.29	594000000
FRVPTVDV	36.48	931.513	8	-1.1	466.763	38.14	563000000
TIPQYLPHLT	36.48	1181.64	10	0	591.83	42.54	96100000
INPLATMNPAA	36.45	1111.57	11	-0.1	556.792	44.62	479000000
FRPGTVALREIR	36.43	1413.82	12	0.3	472.281	21.35	5480000
AVFPSIVGRPR	36.43	1197.7	11	-0.2	400.24	24.96	6840000
LQQQSLSHLTVQS	36.43	1467.77	13	-0.3	734.891	25.22	74100000
LAHLTLQSIM	36.41	1125.62	10	-0.1	563.818	48.4	79100000
AFWQQQQLVNQ(+.98)LALTSPA	36.39	2043.04	18	8.8	1022.54	58.49	1620000
QQHPPPLIT	36.39	1029.56	9	-0.3	515.788	18.66	11000000
LQQPIVGS	36.38	840.471	8	-0.5	421.242	21.91	778000000
RLTGITGIVNGM	36.37	1230.68	12	-0.5	616.345	42.99	17100000
LPQQSALLQQQSLSHLTVQ	36.36	2118.14	19	-0.9	707.054	47.95	130000000
QQQQFLPN	36.35	1001.49	8	-0.9	501.753	26.16	690000000
LQQQQLLPNV	36.35	1179.66	10	-0.1	590.838	44.85	2250000000
IDYAPGGQNPPHTHPR	36.35	1755.84	16	2.3	586.29	14.47	472000
TSHTLQPVPV	36.32	1077.58	10	-1.3	539.798	21.49	5540000
LLVEDIGVLKPT	36.31	1295.77	12	1.6	648.893	50.53	6050000
MFLPQQSA	36.31	920.443	8	-0.2	461.228	33.5	319000000
FRQQPIIGS	36.27	1044.57	9	0.1	523.293	20.35	5130000
THTCPCHQQ(+.98)PPPQTYPH	36.23	1971.84	17	3.7	658.288	16.53	60400000
KPLDTSSPGYQPPIPAE	36.21	1795.9	17	3.7	898.96	35.47	7100
AFHPEIEE	36.21	970.44	8	-0.8	486.227	21.79	68200000
NIPEDDPRNPA	36.18	1236.57	11	0.1	619.294	18.02	17100000
NNIATMLPN	36.16	986.486	9	0.6	494.25	39.37	62200000
SVLNQVGLANPITAA	36.16	1466.81	15	-0.2	734.412	54.65	46400000
FDLMGH	36.15	718.311	6	0	360.163	28.33	11300000
SQQQQLLPFNQ	36.15	1329.67	11	0.3	665.841	45.69	75300000
KHEEDKVIVFE	36.14	1371.7	11	0	458.242	19.47	5470000
VSNVFNQVA	36.13	976.498	9	1	489.257	33.81	0
TVEITGPAEPR	36.13	1168.61	11	-0.2	585.312	20.55	12800000
FSINGKPI	36.12	874.491	8	-1	438.252	26.18	99800000
LVDKEDEEEDGE	36.12	1405.57	12	2.8	703.796	13.68	6310000
FLNGEVGPK	36.1	959.508	9	-0.5	480.761	21.51	44400000
QQQYLAHLTLQ(+.98)SIMAQQHQVLSPFSR	36.09	3052.56	26	7.3	764.152	54.74	10500000
QQQLLPNV	36.07	938.519	8	-0.5	470.266	38.69	75500000
AYWQHQQLLPFNQLA	36.07	1855.94	15	-0.7	928.975	54.85	25500000
LQQQQLLPF	36.06	1113.62	9	-0.6	557.816	54.86	227000000
GYEHPIVQSYRLQQ(+.98)ALAASILPSSA	36.05	2699.39	25	3.8	1350.71	55	0
RLQQALAASIL	36.03	1182.71	11	0.5	592.362	39.91	23900000
LDRPSTPTIDRG	36.02	1326.69	12	0.4	443.237	19.06	4450000
THVPWHLPPVTTLG	36.01	1553.84	14	0.1	518.952	45.57	0
VEVTVTGPH	35.96	937.487	9	0.2	469.751	19.21	6930000
VDLEVKPKPDNTIG	35.93	1523.82	14	0.1	762.917	23.1	80800000
FSVDLPK	35.93	804.438	7	0.6	403.227	29.11	23800000
HLTLQSIMAQQHQVLSP	35.92	1930.01	17	0.3	966.012	47.99	31700000
HSPFFPGYRPQ	35.91	1331.64	11	0.3	666.828	24.15	23000000
SLGVAGSQPGIEGEEIAP	35.91	1709.85	18	0.8	855.932	48.51	155000000
LQQQSALLQQQYLAHLTL	35.89	2095.14	18	-0.1	1048.58	55.17	9630000
QIGRPAFDE	35.88	1031.5	9	-1.3	516.758	21.18	5070000
SALAATASPL	35.86	900.492	10	0	451.253	31.54	12300000
ILSPLNQLA	35.85	967.57	9	-0.5	484.792	49.97	918000000
LIEPKPQEPT	35.83	1150.62	10	0.7	576.319	19.15	7180000
RVETGIIKPGM	35.82	1199.67	11	0	600.842	19.99	10000000
DVLGGLPPPTATVPA	35.81	1403.77	15	-0.2	702.89	53.82	35900000
LQQQSLSHLTVQSITAQQQRILSPLNQ(+.98)LA	35.8	3243.76	29	6	1082.27	55.81	4540000
QLVSNVFNQVA	35.8	1217.64	11	-0.7	609.827	50.72	43400000
YTQSGGVRPF	35.79	1110.55	10	-1.2	556.279	21.39	0
NHPGQIGN(+.98)GYAPV	35.76	1323.62	13	-0.5	662.817	27.08	41100000
PPLHEFLPDGN	35.76	1234.6	11	-0.3	618.306	36.1	427000000
LSRPDVEHLPT	35.75	1262.66	11	0.6	632.339	22.93	26100000
LQQQSLSHLTVQSITAQQQRILSPLNQLALANPA	35.75	3709.03	34	1	1237.35	56.15	1520000
NHPNFPSQIVRPG	35.75	1461.75	13	0	731.881	22.87	6440000
IDDPEAAKPED	35.73	1198.54	11	0.3	600.275	16.27	14700000
MLMQQSPL	35.7	946.462	8	0	474.238	39.63	247000000
LQQQSLSHL	35.7	1052.56	9	0.2	527.288	20.62	8270000
LLESTGIVVVPGSG	35.69	1326.74	14	0.7	664.378	52.24	20600000
MSLQQQSALWQHQSLASPA	35.69	2110.03	19	0.2	1056.02	47.13	297000000
TFVAPLETIR	35.68	1145.64	10	0	573.83	37.32	6820000
GVIINHPEGED	35.68	1178.56	11	0.8	590.286	18.36	0
VIEPSEVRPE	35.68	1153.6	10	-2.8	577.805	20.77	27700000
FDRDDNGIIYP	35.61	1323.61	11	-0.4	662.812	37.99	94800000
QLSPLNPL	35.59	880.502	8	-0.3	441.258	45.31	1990000000
LQQQYLAHLTLQSIM	35.58	1785.94	15	-0.2	893.98	56.06	2850000
NHPNFPSQIVRPGQ	35.57	1589.81	14	-0.5	530.942	23.08	8870000
SHINIVVIGHVDSGKSTTTGH	35.54	2158.11	21	-0.1	720.378	20.81	531000
QQSLSHLTVQSITAQQQ	35.5	1895.97	17	-1.6	948.991	36.4	5390000
ILRDEGPSE	35.5	1014.5	9	1.5	508.257	14.09	918000
EMIESGVIK	35.48	1004.52	9	0.4	503.268	22.41	24100000
VDLEVKPKPD	35.47	1138.62	10	1.9	570.32	17.76	1550000
LAGRPPILPS	35.45	1019.61	10	0	510.814	25.35	25300000
GEPFPSDPK	35.45	972.455	9	0	487.235	18.39	5460000
NQLALASPLAHLQQQAL	35.41	1815	17	0.1	908.507	52.83	14500000
LFGATPPVST	35.39	988.523	10	0.3	495.269	40	19300000
YADLSDKPFFPG	35.39	1355.64	12	-0.6	678.827	47.53	157000000
LGYGNPIVQ	35.39	959.508	9	-1	480.761	36.44	14400000
QLPSMFNPM	35.38	1063.48	9	-0.7	532.748	54.77	176000000
AVDEIIQIPT	35.38	1097.6	10	-0.4	549.806	53.46	9820000
AFVTVDKDAPI	35.38	1174.62	11	-0.3	588.319	34.95	10300000
ILVDKEDEEEDGEAGDGDE	35.38	2062.83	19	0.6	1032.42	28.4	6040000
RLQQALAASILPSSAM(+15.99)FLPQ(+.98)Q	35.35	2286.2	21	0.9	763.076	44.83	5050000
LKPNMVTPGSDS	35.35	1244.61	12	0.4	623.311	19.51	13500000
VNPLAAMNAA	35.33	970.491	10	-0.1	486.252	41.46	9610000
LQQQQLLPFNQLA	35.32	1539.84	13	1.3	770.929	56.11	7560000
GTIAGGGVIPH	35.29	977.529	11	-0.3	489.772	21.92	105000000
NPMATAIPPM	35.28	1041.5	10	-0.6	521.756	43.49	11200000
FKDEIVPVPT	35.28	1143.62	10	0.3	572.816	35.43	17200000
ALASPLAHL	35.27	891.518	9	-0.6	446.766	31.74	0
GYEHPIVQSYRLQQALAA	35.22	2043.05	18	-2.3	1022.53	39.67	17700000
VDAIINSGPR	35.19	1040.56	10	-0.8	521.288	19.53	10300000
GVAGSQPGIEGEE	35.18	1228.56	13	-0.7	615.285	22.37	39600000
LQQALAASILPS	35.17	1210.69	12	0.3	606.354	50.71	34200000
WQQQQQLPFNPL	35.16	1525.77	12	1.7	763.892	58.92	17800000
LQQPFIGGA	35.16	929.497	9	-0.6	465.755	36.71	444000000
V(+42.01)RPRVP	35.14	764.466	6	3.3	383.241	52.17	765000000
YIETSKPDPL	35.13	1161.59	10	-0.8	581.803	22.82	7450000
WLMDKDMYD	35.13	1215.49	9	0.2	608.754	46.03	25800000
AFLQQQQLLP	35.1	1184.66	10	-0.1	593.335	53.34	1120000000
SVASDRDVQGPVS	35.1	1315.64	13	2	658.827	17.42	2010000
IVIPAGHPM	35.09	933.511	9	-0.1	467.762	24.09	827000000
AHWQQQQ(+.98)LVS	35.08	1224.59	10	1.7	613.303	21.25	0
EGGVLPGIK	35.06	868.502	9	0.5	435.258	22.11	11700000
AYWQHQQLLPF	35.06	1429.71	11	0.5	715.865	54.07	40200000
SPGPRDEAALQFIQSA	35.05	1685.84	16	0.2	843.926	48.25	19900000
VVVTEVLGGGK	35.04	1056.62	11	-0.7	529.316	26.24	7540000
LLPNVFN	34.99	815.454	7	-0.3	408.734	49.07	69300000
EEGEGEWRPE	34.97	1216.5	10	2	609.258	20.98	6630000
VALSGGHTIGLG	34.96	1080.59	12	-0.2	541.303	27.1	5900000
PQQSALLQQQSLSHLTVQSITAQQQR	34.92	2917.54	26	-1.6	973.518	45.84	14500000
YEEAMPPLEEGP	34.91	1360.59	12	0.7	681.301	46.4	16400000
VETGIIKPGM(+15.99)	34.88	1059.56	10	-6.8	530.785	19.54	6240000
WQ(+.98)QQQFLPN	34.86	1188.56	9	0.9	595.286	46.98	62800000
SPFAQLQQQQLVS	34.82	1472.76	13	-0.4	737.388	49.36	51400000
SSPAMSLQQQSALWQHQSLASPA	34.82	2452.18	23	-0.3	1227.1	50.31	181000000
IAHGGVLPNINPV	34.81	1299.73	13	0.3	650.872	36.84	5700000
RINPLAAMNPT	34.81	1196.63	11	0.8	599.324	32.07	18400000
LNRPSIM	34.8	829.448	7	-1.4	415.731	20.65	26700000
LAPPATVDQPR	34.8	1163.63	11	-0.7	582.822	19.9	6660000
KEGGVLPGIKVD	34.79	1210.69	12	-0.1	606.353	23.17	9980000
PQIHLPQ	34.77	831.46	7	-0.4	416.737	47.69	13400000
VFIPQGSL	34.74	859.48	8	-0.5	430.747	43.43	42300000
IIGATNRPDIIDPA	34.73	1464.79	14	0	733.404	34.77	119000000
LEGTLLKPN	34.71	983.565	9	-1.3	492.789	21.52	10600000
AGLQFPVG	34.71	787.423	8	0	394.719	44.13	19300000
LRVNPLAAMNAA	34.71	1239.68	12	0.1	620.845	39.71	0
EKFLGTIPM	34.71	1034.55	9	-0.1	518.281	45.79	9980000
TAAYWQQQQFLPNV	34.71	1692.83	14	1.4	847.421	56.19	1000000
ALSQQQSLAHVTV	34.69	1380.74	13	0	691.375	26.92	3940000
DRPFFPPTINSPE	34.68	1515.74	13	-1.2	758.874	47.23	49500000
VAVNDPFIT	34.63	974.507	9	1.5	488.262	46.8	24800000
LDPPLHEFLPDGN	34.59	1462.71	13	0.5	732.362	51.86	342000000
GVDRVFIDHPS	34.53	1240.62	11	0.2	621.317	21.35	6880000
AIPQYLPHV	34.53	1036.57	9	-0.4	519.292	38.5	29600000
SSPPEDQSQETEAPH	34.53	1637.68	15	2	819.849	13.66	4050000
EPPKVPIPTPL	34.52	1186.7	11	0.5	594.356	41.71	259000000
AIEAIVSMEK	34.51	1089.57	10	-0.5	545.794	29.18	13900000
AEFGPSKPF	34.46	978.481	9	0.8	490.248	27.48	13700000
SNFNDIIH	34.42	958.451	8	0.3	480.233	26.87	0
LQQQTLLPFN	34.42	1200.65	10	-0.3	601.332	52.38	39800000
EGLPAFPMG	34.42	917.432	9	-0.6	459.723	54.03	5000000
KFDLPEGGAIPK	34.39	1270.69	12	-0.3	636.353	28.29	13700000
GEHGGAGMGGGQFQPV	34.38	1484.65	16	-0.5	743.33	23.31	70000000
QMVQQQQ(+.98)PPYGGGVQGQ	34.37	1829.84	17	9.7	915.934	27.92	152000000
IHDFIGDG	34.37	872.403	8	0	437.209	23.27	516000000
ADYDFGHT	34.37	924.361	8	-0.1	463.188	21.05	2500000
ALGYGNPIVQPY	34.36	1290.66	12	0.5	646.338	50.65	659000000
RLVSGAIAGAVS	34.36	1099.63	12	-0.4	550.824	23.95	414000000
LGIDVWEH	34.31	967.476	8	0.2	484.745	43.2	14900000
AGLSDPNRPIA	34.3	1109.58	11	0.2	555.799	19.71	6660000
KILVDKEDEEED	34.3	1460.69	12	0.8	731.352	14.88	514000
QQGLDITPK	34.28	998.54	9	-0.9	500.277	19.41	5200000
AILQQQLSPLNP	34.26	1320.74	12	0.4	661.378	49.53	549000000
SNIEVNPRPDET	34.26	1369.65	12	0.6	685.831	19.62	65700000
ADEPPKVPIPTP	34.24	1259.68	12	0.9	630.846	36.21	235000000
WQHQQLLP	34.21	1048.55	8	-0.4	525.28	28.77	11300000000
ILASGVHVVVGTPG	34.2	1304.75	14	-0.8	653.379	32.05	17600000
NVHVAGGNILPL	34.2	1202.68	12	-0.3	602.346	40.31	347000000
DWAGGLGSSTPSLRPTAPHQ(+.98)PAGS	34.19	2347.12	24	8.5	1174.58	39.53	0
LGYGNPIVQPYRLQQALAA	34.17	2071.12	19	2.2	1036.57	53.77	4570000
IGRPAPMPY	34.17	1000.52	9	0.1	501.265	22.62	41200000
AVVKFNAALAHHIMAGADL	34.16	1948.04	19	0.8	650.353	45.56	11300000
FKELPPYDPD	34.16	1219.58	10	0.7	610.796	31.47	0
VQLQPEHGGLPA	34.15	1244.65	12	-0.2	623.333	23.13	233000000
VLLDGSATGPGEK	34.15	1242.65	13	-0.3	622.33	20.92	21400000
AQADIGGVPNPIPPPTQPPVPEV	34.14	2289.2	23	2.5	1145.61	55.61	8280000
RFDLGDAD	34.13	907.404	8	-0.5	454.709	23.11	113000000
VHVAGGNILP	34.13	975.55	10	0	488.782	26.13	9970000
SPVTQLQQQ	34.11	1027.53	9	-0.1	514.772	21.3	12000000
AIGINVPR	34.1	838.502	8	-1.1	420.258	22.8	24900000
QQQQLLPN	34.09	967.509	8	-0.5	484.761	22.77	403000000
WQQQQ(+.98)FLPN	34.03	1188.56	9	-2	595.284	45.93	80800000
N(+.98)MDWAGGLGSSTPSLRPT	34.01	1846.85	18	9.6	924.442	49.57	1890000
SSPAMSLQQQSALWQHQS	33.96	2012.94	18	1.4	1007.48	41.7	8560000
QQLPSMFNPM(+15.99)	33.93	1207.54	10	-0.7	604.775	47.95	41800000
AFLQQPIIGSG	33.93	1129.61	11	-0.5	565.814	49.42	47300000
PGLTHPGIVGTAPS	33.9	1302.69	14	-0.4	652.354	24.32	6770000
LSLGVAGSQPGIEGE	33.89	1412.71	15	0.2	707.365	46.86	892000000
TMLPNVFNQ	33.86	1062.52	9	-1.5	532.265	53.26	7310000
ATMLPNV	33.84	744.384	7	-0.2	373.199	34.86	82700000
VAVPGVPAKPV	33.84	1032.63	11	-0.9	517.323	26.1	9860000
TGNHTFDPL	33.84	1000.46	9	0.1	501.238	23.29	54800000
YERPSLSD	33.83	965.445	8	-0.2	483.73	18.69	12900000
ALANPYLQQP	33.83	1113.58	10	0.3	557.798	37.98	53600000
IIGATNRPDIID	33.82	1296.7	12	0	649.359	30.6	9410000
IIGATNRPDLLD	33.82	1296.7	12	0	649.359	30.6	9410000
ALGLPLERPK	33.8	1092.67	10	-0.6	365.229	22.97	10700000
LAHLTLQSI	33.78	994.581	9	-0.3	498.298	36.12	4820000
MLRPADGNETSGA	33.76	1317.6	13	2	659.808	16.09	2220000
M(+15.99)MPSMMPF	33.75	986.373	8	-1	494.193	55.5	8720000
FIDGYEKPV	33.73	1066.53	9	-0.6	534.274	25.82	47800000
SGILAPSPV	33.71	839.475	9	-2.2	420.744	35.61	4220000
QRTPDYVEEA	33.7	1206.55	10	-0.2	604.283	19.08	36900000
HLPPVTTLG	33.67	933.528	9	0.1	467.772	23.08	14300000
LTDKDPNVTVNPDE	33.67	1555.74	14	-0.3	778.875	22.3	16400000
GIDVFDPK	33.66	889.455	8	-1.4	445.734	29.19	73200000
AAIPQYLPH	33.65	1008.54	9	1.1	505.277	30.88	26600000
WQQQQLLPN	33.64	1153.59	9	0.4	577.802	39.8	1910000000
AIPQYLPH	33.6	937.502	8	-0.6	469.758	28.32	592000000
SQQQQLLPFNQL	33.59	1442.75	12	-0.6	722.383	55.85	0
KDALLPSGTV	33.59	999.56	10	-0.1	500.787	25.58	12500000
KDALIPSGTV	33.59	999.56	10	-0.1	500.787	25.58	12500000
ILEDQVSPK	33.57	1027.55	9	0.6	514.785	18.02	3080000
GITSDIEWAGDDH	33.55	1414.6	13	0.1	708.307	43.67	6110000
MQQQQLPSMFNPM	33.55	1578.7	13	-0.1	790.357	55.45	79100000
ARFEELNMDL	33.54	1236.58	10	-1	619.297	47.72	9100000
GNIFDGIQRPL	33.53	1228.66	11	-0.5	615.335	47.91	0
VPGMLEKPEL	33.5	1111.59	10	-0.1	556.805	33.92	11600000
DDIGIDLPK	33.48	984.513	9	-1.1	493.263	38.72	6190000
ATVTVEGITAV	33.46	1059.58	11	-5.6	530.795	33.18	6980000
IYKDELVE	33.45	1007.52	8	0.7	504.766	21.36	11400000
VGAEM(+15.99)APWS	33.42	962.417	9	-0.5	482.215	31.34	20900000
FLQQQQLLP	33.4	1113.62	9	-0.1	557.816	49.35	66800000
LVVINPGNPTGQ	33.38	1207.66	12	0.1	604.835	38.91	21400000
QQLPFNPL	33.37	955.513	8	1.2	478.764	52.53	78200000
ILVDKEDEEEDGE	33.37	1518.66	13	0.3	760.336	21.9	127000000
NHTDFIIT	33.35	959.471	8	0	480.743	26.07	19600000
NPEEIPW	33.35	883.408	7	-1.2	442.711	47.21	75400000
SNVFNQVA	33.34	877.429	8	-0.4	439.722	28.45	7260000
FLPQQSALLQQQSLSHLTV	33.31	2137.15	19	-0.4	1069.58	53.91	14800000
ALLQQQ(+.98)SLSHLTVQSITAQQQR	33.29	2478.32	22	8.7	827.121	42.96	58600000
QNPPHTHPR	33.25	1082.54	9	-0.1	542.276	17.96	3700000
GLEVKPWV	33.23	926.523	8	-0.6	464.268	36.77	26500000
ENPIVQSNRLQQA	33.21	1495.77	13	0.1	748.894	22.72	7900000
IVIPAGHPM(+15.99)T	33.2	1050.55	10	0.6	526.284	20.93	27400000
FKDFTLDPL	33.2	1094.56	9	-0.1	548.29	51.59	23800000
LANPYLQQP	33.19	1042.54	9	1	522.28	35.18	17300000
ALGYGNPIVQ	33.18	1030.54	10	-0.1	516.279	39.35	42600000
VFEEMQRPGTPL	33.18	1402.69	12	0.9	702.354	36.1	41800000
EMQRPGTPL	33.17	1027.51	9	-0.6	514.763	19.56	12500000
SM(+15.99)MLQQPW	33.17	1035.45	8	-1.7	518.732	43.87	5050000
WRQPFPS	33.17	916.456	7	-0.4	459.235	25.41	786000000
WQQQQFLP	33.16	1073.53	8	-0.6	537.772	49.04	8060000
LQQQ(+.98)YLAHLTLQSIMAQQHQ	33.16	2379.2	20	7.4	794.08	52.38	1680000
PSMFNPM(+15.99)	33.15	838.335	7	-1.5	420.174	28.97	8750000
VIPGPGDKPMIV	33.14	1221.68	12	0.6	611.847	33.84	20900000
DSPGHVDFS	33.13	959.398	9	-0.2	480.706	20.73	4380000
SVLAGFEPK	33.13	946.512	9	0.6	474.264	28.14	37400000
GDLEEHVPKP	33.12	1119.56	10	0.2	560.785	20.33	4920000
AFWQQQQL	33.1	1047.51	8	0.1	524.764	48.48	619000000
LRINPLATM(+15.99)NPAA	33.1	1396.75	13	1	699.383	31.47	30600000
VVADIIGKPEA	33.08	1110.63	11	0.4	556.322	26.23	53300000
LLQQQSLSHLTVQ	33.08	1493.82	13	0.3	747.918	33.53	7850000
SQITQQQQLPF	33.07	1316.67	11	0.2	659.344	45.73	20500000
ALVVINPGNPT	33.07	1093.61	11	0.2	547.814	38.97	10300000
QQQQLLPLNP	33.07	1177.65	10	0.3	589.83	44.05	8390000
EFYDPQTPF	33.06	1142.49	9	-1.1	572.253	54.25	11600000
GWEEGEGEWRPE	33.05	1459.6	12	1.1	730.808	37.45	0
EIIYDIGPVPK	33.04	1242.69	11	-1.6	622.349	40.65	15200000
SPLYLPQ	33.02	816.438	7	-1.1	409.226	37.03	5790000
IPQYLPH	33.02	866.465	7	-1	434.239	23.97	27900000
REEWEQV	33.01	974.446	7	-0.5	488.23	21.86	26600000
SGVHVVVGTPG	32.97	1007.54	11	-0.3	504.777	19.85	10200000
SELRPGIDL	32.97	998.54	9	0.9	500.277	31.01	3780000
PIATMLPNV	32.95	954.521	9	-0.4	478.267	50.88	3130000
MLQQPW	32.94	801.384	6	0.1	401.7	38.38	1190000000
ANPAAFWQQQQLV	32.92	1499.75	13	0.1	750.883	55.81	16400000
FRIPSSVDV	32.9	1018.54	9	-0.4	510.279	39.4	18900000
LPQATTTLLPNV	32.86	1266.72	12	0.5	634.367	53.04	6800000
EGLPAFPM	32.83	860.41	8	-0.7	431.212	55.08	10300000
FIINHPEIMSPL	32.82	1409.74	12	1.1	705.877	52.7	9140000
KAEAEEEGDIVA	32.8	1259.59	12	0.3	630.802	18.41	3980000
MLMSAEEKYPDK	32.78	1440.66	12	-0.2	481.228	20.1	21600000
GIYPAVDPL	32.77	943.501	9	-1.9	472.757	51.24	6060000
FELYDPVGGEH	32.77	1261.56	11	0.2	631.788	45.83	12800000
IISSIEQKEEG	32.77	1231.63	11	0.4	616.822	18.68	8270000
FVIGGPHGDAGLTG	32.75	1296.65	14	-0.2	649.33	34.47	4980000
KPIPDFS	32.72	802.423	7	-0.6	402.218	21.2	77900000
VADKWIEL	32.71	972.528	8	-0.5	487.271	40.78	5860000
EHPIVQSYRLQQALAASILPSSAM	32.67	2609.36	24	-0.8	870.794	55.47	10200000
NPYLQQPF	32.63	1005.49	8	1.2	503.754	45.95	90200000
AQLQQQQLV	32.62	1054.58	9	0.1	528.296	25.96	86800000
RFNFPENGVE	32.62	1207.56	10	-0.4	604.788	30.71	0
M(+15.99)VQQQQPPYGGGVQG	32.59	1588.73	15	-1.2	795.371	22.7	18600000
VNPLAAMNAAA	32.58	1041.53	11	0	521.771	43.96	89300000
AFLQQPIIG	32.58	985.56	9	-0.4	493.787	49.96	18300000
IKAPGFGE	32.56	817.433	8	-0.8	409.724	21.45	23300000
RLQQALAASILPS	32.53	1366.79	13	0.9	684.404	41.15	379000000
LQQPIVGSA	32.5	911.508	9	-0.2	456.761	24.59	4560000000
ALGYENPIVQSN	32.49	1303.64	12	1	652.828	41.84	18600000
MLPNVFNQ	32.49	961.469	8	-0.2	481.742	48.55	64900000
YISVPIEGPYKPA	32.47	1432.76	13	-0.3	717.387	41.12	9940000
QQLLPFNQLA	32.47	1170.64	10	0.2	586.327	55.39	3660000
FIMIKPDGV	32.45	1018.55	9	-0.2	510.283	37.86	0
FVVPVGHPV	32.44	949.538	9	-0.1	475.776	29.25	3980000
KPLFSPEHFSP	32.43	1284.65	11	0.3	643.333	28.54	27300000
SNIEVNPRPD	32.42	1139.56	10	1.4	570.787	17.74	7290000
ALTSPIAHWQQQQLVSSV	32.4	1992.04	18	-1.1	997.028	51.35	59700000
AYWQHQQLLP	32.39	1282.65	10	0.6	642.331	39.84	27090000000
YEHLVVTPADEEEPA	32.38	1697.78	15	-0.2	849.896	33.67	19700000
EHPIVQSYRLQQ(+.98)ALAASILPSS	32.33	2408.27	22	9.9	1205.15	53.8	4010000
QIIVDAIINSGPR	32.32	1394.79	13	-0.4	698.401	48.36	25100000
KVPAVAPFE	32.3	956.533	9	-0.9	479.273	26.13	9670000
NGDILARPM	32.29	985.501	9	2.1	493.759	23.26	0
RVVAEAEAGT	32.28	1001.51	10	1.4	501.765	12.22	143000
SHPADFTPV	32.28	969.456	9	-0.9	485.735	20.62	99200000
SPEHFSPL	32.26	912.434	8	0.5	457.224	22.94	12800000
MAQQHQVLSPFS	32.25	1371.66	12	-0.1	686.837	29.32	160000000
LANPYLQQPF	32.22	1189.61	10	0.1	595.814	52.83	179000000
LLNFGQVSP	32.2	973.523	9	0.5	487.769	49.9	7920000
LASPVTQLQQQQLVSSV	32.18	1824.99	17	0	913.505	53.43	45200000
LTGITGIVN(+.98)GMD	32.15	1190.59	12	-0.2	596.3	55.13	6400000
ATSTHTCPCHQQPPPQTYPH	32.15	2229.97	20	2.3	558.501	13.88	1290000
SLGLDFPK	32.15	875.475	8	-0.6	438.745	35.51	0
AFNSQLQGT	32.13	964.461	9	-1	483.238	22.81	21100000
WGDLSGHP	32.13	867.388	8	-0.4	434.701	22.62	11200000
LHEAGLPEGV	32.12	1020.52	10	0	511.269	25.18	0
NDQVDVMKPGTT	32.12	1303.61	12	-0.3	652.811	20.45	3080000
QFFEKPV	32.11	893.465	7	-0.2	447.74	23.34	62000000
IDGYEKPV	32.11	919.465	8	-0.1	460.74	18.26	2680000
VDLYVPR	32.11	860.476	7	-0.5	431.245	25.78	4600000
PPPPTSIPKPDT	32.09	1245.66	12	0.3	623.838	44.39	0
ILVDKEDEEE	32.08	1217.57	10	-0.1	609.79	18.56	46900000
SVFNQVALANPY	32.07	1321.67	12	-0.7	661.84	54.12	20100000
TIPQYLPHL	32.06	1080.6	9	2.2	541.307	45.65	21300000
MLPNVFN	32.03	833.41	7	0.3	417.713	48.06	66200000
KLFPDGFE	32.03	951.47	8	-0.7	476.742	41.52	9070000
IFDNMQKPA	31.97	1062.52	9	-0.6	532.265	22.81	10500000
LQQQSALLQQQYLAHLTLQS	31.97	2310.23	20	1.4	1156.13	53.94	9700000
AASILSSPAMSLQQQSALWQHQSLASPA	31.96	2907.45	28	2.6	1454.74	56.01	5990000
GLVDTVIEGK	31.94	1029.57	10	1	515.793	35.96	4670000
LASGILAPSPV	31.93	1023.6	11	-0.3	512.805	43.43	752000000
MTLQQQQQLLVNPI	31.91	1652.89	14	-0.2	827.453	54.82	285000000
IFEINPDHPI	31.9	1193.61	10	0	597.811	43.37	24600000
SVESWLPMPR	31.9	1200.6	10	-0.4	601.305	48.17	141000000
HIMAGADL	31.89	826.401	8	-1.3	414.207	21.43	28000000
IAVHSPGLIP	31.88	1002.59	10	-1.1	502.3	31.1	20900000
QHQQLLPFNQLAVENA	31.88	1848.95	16	0.2	925.482	50.57	32900000
VNPIATMLPNV	31.87	1167.63	11	2	584.824	56.25	784000
LPQQSALLQQQ(+.98)SLSHLTV	31.87	1991.07	18	8.3	664.702	50.4	28.9
MFLPQQSALLQQ	31.85	1402.73	12	-0.5	702.371	54.06	58800000
HVTVQSITAQQQQ(+.98)YLPA	31.83	1911.97	17	9.9	957.001	41.51	0
VSSVLNQVGL	31.83	1014.57	10	-0.4	508.293	51.24	2790000
QQQSLSHLTVQSITAQQQ	31.81	2024.03	18	-0.1	1013.02	36.45	371000000
IGLGTAVQGPRPD	31.8	1279.69	13	1.1	640.852	27.18	5020000
AEGGGDDEGVDDQ	31.8	1262.45	13	3.4	632.236	13.14	1100000
AVLPDLDIK	31.79	982.57	9	0.7	492.293	39.77	53600000
GDLGPLHP	31.78	804.413	8	-0.4	403.214	23.1	59800000
VHVAGGNILPL	31.77	1088.63	11	1.2	545.325	38.24	44200000
LQQPIIGS	31.77	854.486	8	-0.5	428.25	27.19	381000000
M(+15.99)ALDRPSTPTID	31.76	1331.64	12	0.6	666.827	25.66	12500000
IVLRPLEPAPI	31.76	1216.75	11	-1.7	609.383	43.06	3940000
PHQQPPI	31.76	815.429	7	1.2	408.722	12.68	87300
QQQLSPLNP	31.76	1023.53	9	-0.1	512.775	29.25	111000000
QQPPILT	31.76	795.449	7	-0.6	398.732	23.18	81600000
RVTLPAPADT	31.75	1039.57	10	-0.3	520.79	21.22	22900000
LLDPPLHEFLPEGN	31.75	1589.81	14	0.9	795.912	54.39	19700000
DFVGIHTPK	31.71	1012.53	9	1.5	507.275	22.57	5740000
NPAAFWQQQQLVNQ	31.71	1670.82	14	0.7	836.416	52.53	11100000
LSLGVAGSQPGIEGEE	31.7	1541.76	16	0.1	771.886	47.28	3630000000
AELPPTHPI	31.7	973.523	9	0.4	487.769	21.09	75900000
NQVPLANPYLQQP	31.7	1480.77	13	0.4	741.391	48.03	67800000
TETSPEDVGGM(+15.99)	31.69	1137.45	11	-0.1	569.732	17.5	10000000
ALASPVTQLQQQQLVSS	31.68	1796.96	17	0.1	899.489	50.12	18800000
VWVKPW	31.67	813.454	6	0.4	407.734	33.49	23000000
AFWQQQQ	31.65	934.43	7	-0.4	468.222	33.05	329000000
LPQQSALLQQQSLSHLTVQSITA	31.64	2490.34	23	-1.2	1246.18	53.52	118000000
YGINVPR	31.61	817.445	7	0.8	409.73	21.61	2460000
LLDPPLHE	31.6	932.497	8	-0.9	467.255	27.44	123000000
RAMLGPEV	31.59	871.459	8	-1	436.736	21.4	18500000
RVVAEAEAGTV	31.56	1100.58	11	1.8	551.299	17.48	1740000
MHQQPPYGGVP	31.56	1209.56	11	0.4	605.788	21.02	346000000
QQQYLPA	31.55	846.423	7	-0.1	424.219	23.04	11900000
VINPTLPR	31.54	908.544	8	-1.2	455.279	21.61	15600000
PPLHEFLPDGN(+.98)	31.53	1235.58	11	0.6	618.799	39.68	0
FWIPR	31.52	717.396	5	-0.7	359.705	30.95	50600000
FRFDGVTS	31.52	927.445	8	0.2	464.73	29.5	40600000
SSVLNQVGLANPITAA	31.51	1553.84	16	-0.9	777.927	54.74	35200000
LPQQSALLQ(+.98)QQSLSHLT	31.5	1892	17	8.7	631.68	44.27	0
GEGVTDVAPGDH	31.47	1152.5	12	2.8	577.261	17.65	3080000
ELYDPVGGEH	31.45	1114.49	10	0.3	558.254	27.2	16400000
RGHVFEEMQ(+.98)RPGTPL	31.45	1753.86	15	8.8	585.631	23.5	4670000
LLLIGDSGVGK	31.44	1070.63	11	0	536.324	36.56	0
TAAYLQQQQLLPN	31.43	1486.78	13	-1.7	744.395	47.1	46300000
QQLLPNV	31.43	810.46	7	-0.7	406.237	38.7	167000000
LKDGAFEDV	31.43	992.481	9	-0.9	497.248	23.14	23900000
GHVFEEM	31.42	847.353	7	-1	424.683	21.25	0
VNGMDVSEWDPSKD	31.41	1577.67	14	0	789.841	42.8	265000000
VPIGIGENT	31.4	898.476	9	0.8	450.246	28.75	30200000
GM(+15.99)HQQPPYGGVP	31.35	1282.58	12	0.3	642.296	19.73	88000000
AANVETFPGVN	31.35	1117.54	11	0.2	559.778	36.27	5210000
SSVLNQVGLANPI	31.35	1310.72	13	-1	656.366	53.85	131000000
WMDQTLDHFNPTDH	31.35	1755.73	14	1.2	878.874	44.61	118000000
VIIM(+15.99)NHPGQIGNGYAPV	31.32	1794.91	17	-0.4	898.461	35.2	23400000
ILSPLNQL	31.32	896.533	8	-0.8	449.274	50.78	77400000
YRLQQALAA	31.32	1032.57	9	0.2	517.293	24.6	9480000
VNHDSDIGDL	31.3	1083.48	10	-0.5	542.749	21.21	12700000
LSLPVGKE	31.3	841.491	8	-0.8	421.752	22.95	14700000
FSNIEVNPRPDET	31.3	1516.72	13	-0.1	759.365	28.12	152000000
GRFEEFFPI	31.28	1140.56	9	-0.5	571.287	54.84	210000000
EDWLGDLNPH	31.26	1194.53	10	-1.7	598.271	51	12600000
LPADFFPDRVPIT	31.26	1486.78	13	-0.5	744.398	53.9	30500000
AGFPSPTPPAWTPDPK	31.26	1664.82	16	-0.2	833.417	45.27	14000000
QQQQLLP	31.24	853.466	7	-0.1	427.74	26.3	178000000
SPLAHLQQQALV	31.22	1303.72	12	-0.5	652.869	35.37	54800000
FNAALAHHIMAG	31.19	1251.62	12	0.2	418.213	24.44	8690000
FLQQPIIGS	31.16	1001.55	9	-0.2	501.784	42.22	1730000000
NQLALTSPIAHWQQQQLV	31.15	2074.1	18	0.9	1038.06	53.89	4100000
ALGYENPIV	31.14	974.507	9	-0.6	488.261	43.55	57900000
FLPQQSA	31.12	789.402	7	-0.9	395.708	20.2	163000000
IYGGTHGQGVGGGGRPVGEQ	31.09	1881.91	20	3	628.312	16.4	1280000
MLMSAEEKYPDKV	31.09	1539.73	13	0.6	514.251	25.39	20000000
FSSQVKDEEGNPA	31.09	1406.63	13	1.6	704.324	17.54	1730000
VVIIPDH	31.09	791.454	7	-0.6	396.734	21.92	40900000
REDRPAGGQGGPRPGGPGPAGAA	31.04	2084.03	23	1.7	522.015	13.09	4560000
LAHLTLQSIMAQQHQV	31.01	1816.96	16	0.3	606.661	43.69	0
SALAATASPLYLPQAT	30.97	1573.84	16	0.1	787.925	53.04	13800000
AFLHQPI	30.94	824.455	7	-0.3	413.234	23.27	1560000000
PQYLPHV	30.9	852.449	7	-0.3	427.232	37.82	0
VSSVLNQVGLANPITA	30.9	1581.87	16	-0.5	791.943	55.41	12200000
ADLAPTHPI	30.9	933.492	9	-1.3	467.753	20.89	8540000
YWQHQQLLP	30.89	1211.61	9	0.1	606.812	34.57	186000000
VPWHLPPV	30.88	943.528	8	-0.3	472.771	43.23	4680000
SVLNQVGL	30.86	828.471	8	0.6	415.243	47.07	15600000
AQLQQQQLVSNVFNQVA	30.83	1914	17	-0.3	958.005	55.99	58000000
EGSVIVIPAGHPM	30.83	1305.67	13	1.4	653.846	36.68	17100000
LQQQYLAHLT	30.82	1213.65	10	1	607.831	28.51	23700000
VETGIIKPGM	30.81	1043.57	10	0.6	522.792	24.46	510000000
QLQGETNIKPL	30.81	1239.68	11	-0.2	620.848	23.28	15300000
THFIVPW	30.79	898.47	7	-0.2	450.242	43.09	10400000
TCGM(+15.99)HQ(+.98)Q(+.98)PPYGGVP	30.77	1488.6	14	-3.7	745.305	21.7	22600000
NGMDVSEWDPSKDK	30.76	1606.69	14	0.1	804.354	30.07	5290000
EPRHLDQLLHPQ	30.75	1481.77	12	-6	741.89	33.73	0
KEGGVLPGI	30.74	868.502	9	-0.9	435.258	26.16	25800000
YWGDLSGHPL	30.73	1143.53	10	-0.9	572.774	42.59	82500000
IIDKEGVIQ	30.7	1013.58	9	-0.2	507.795	19.47	14700000
LALDGNTSPH	30.69	1023.5	10	-0.1	512.756	18.61	3260000
GFKDQIYD	30.67	984.455	8	-0.6	493.235	22.7	44100000
IDIPPPR	30.65	806.465	7	1	404.24	19.21	7110000
LNLLERPVPV	30.6	1148.69	10	0.5	575.353	41.26	0
INLLERPVPV	30.6	1148.69	10	0.5	575.353	41.26	0
AAVAYEPNKPL	30.6	1171.62	11	-0.5	586.819	22.58	10400000
FLQQPW	30.59	817.412	6	-0.6	409.713	46.59	508000000
FIQQPW	30.59	817.412	6	-0.6	409.713	46.59	508000000
NQLALANPITAA	30.59	1195.66	12	0.5	598.836	47.5	59100000
HSASGEVTIK	30.56	1027.53	10	2.5	514.773	9.99	2510000
AATIPQYLSPY	30.55	1222.62	11	1.2	612.32	51.89	668000000
FESFRPLPE	30.54	1120.56	9	-3.2	561.283	35.33	4190000
KKAPPTPA	30.54	808.481	8	2.5	405.249	7.73	21300
MPPLEEGPYG	30.52	1088.48	10	-1	545.249	41.61	73800000
QQQQLLPF	30.51	1000.53	8	-1.1	501.274	52.32	39700000
LPPMQYPK	30.49	972.51	8	-1	487.262	22.66	12000000
DELTLEGIK	30.45	1016.54	9	0.4	509.277	35.6	16700000
RPFGDAAVDGID	30.43	1231.58	12	-0.3	616.799	32.67	1420000
HEFLPDGNVEDI	30.41	1383.63	12	1.6	692.824	47.09	10400000
VSSVLNQVGLANPI	30.41	1409.79	14	1.5	705.902	55.21	54300000
SAMFLPQ	30.39	792.384	7	0.7	397.2	39.33	16100000
IVLPPW	30.38	723.432	6	0.5	362.723	55.68	797000
IVIPPW	30.38	723.432	6	0.5	362.723	55.68	797000
NPLDLLPPS	30.38	964.523	9	-1.2	483.268	53.4	27000000
YFNHGGILP	30.37	1016.51	9	0.3	509.261	32.87	32800000
AELAPTHPI	30.36	947.508	9	0	474.761	20.35	2760000
GGTHGQGVGGGGRPVGE	30.35	1477.7	17	1.6	493.575	10.72	72300
FSAPIRPDV	30.35	1000.53	9	0.1	501.274	28.66	30500000
VFVGAEMAPWS	30.35	1192.56	11	1.1	597.287	56.09	2330000
PPEEVKHVFKHPQPK	30.33	1795.97	15	1.5	450.001	12.42	120000
IVIPAGHPM(+15.99)	30.32	949.505	9	-1.2	475.759	19.95	20100000
SLVDTDHL	30.31	898.44	8	-0.5	450.227	26.8	0
FQDKESLYP	30.3	1125.53	9	2.1	563.776	24.95	0
AMAEDYEKPGAA	30.28	1251.54	12	1.3	626.78	18.57	7290000
HWDPPASE	30.28	937.393	8	-0.2	469.704	18.27	4260000
ATVIPPM	30.22	727.394	7	-0.9	364.704	33.25	21000000
QQQLSPL	30.19	812.439	7	-0.9	407.226	25.88	924000000
IVHIDIDPA	30.18	991.534	9	-0.5	496.774	33.22	1460000
FVGAEMAPW	30.17	1006.46	9	-0.1	504.236	54.68	24700000
TLQSIMAQQHQ	30.15	1283.63	11	-2.5	642.82	24.37	5490000
WMHPGGVLPPQ	30.12	1217.6	11	-0.1	609.808	32.62	9120000
GYGGDVWFPQPAPK	30.11	1517.73	14	-0.7	759.872	44.84	14000000
VNDLIHGLYPE	30.09	1268.64	11	-1.6	635.326	45.17	62100000
FRLPEDA	30.09	846.423	7	-0.1	424.219	25.3	60300000
VPLVGTPQ	30.09	809.465	8	-0.8	405.739	26.81	9890000
SAMFLPQQSALLQQQ	30.07	1688.86	15	0.4	845.435	54.86	50200000
LQQ(+.98)QQLLPNV	30.06	1180.65	10	-1.5	591.329	48.28	16700000
VLQFFEKPVGA	30.06	1233.68	11	-0.5	617.845	43	45500000
KIIGATNPL	30.05	925.56	9	-0.3	463.787	22.89	50500000
KLIGATNPL	30.05	925.56	9	-0.3	463.787	22.89	50500000
ATTTLLPNV	30.04	928.523	9	0	465.269	42.51	25300000
FIDASSTPR	30.04	992.493	9	-0.3	497.253	17.97	3520000
IIGATRPW	30.02	912.518	8	0	457.266	26.77	404000000
SEFREPEV	30.02	991.461	8	-0.8	496.737	22.57	3150000
LGYENPIV	30	903.47	8	-0.1	452.742	41.34	51400000
NQLALASPLAHLQQQ	29.99	1630.88	15	9.5	816.455	45.02	17000000
MVHWPV	29.97	767.379	6	-0.6	384.697	29.22	26000000
VVAEAEAGTVT	29.97	1045.53	11	-2.5	523.771	20.47	43500000
LAMLMQQSPL	29.97	1130.58	10	-0.3	566.298	53.59	3600000
M(+15.99)NHPGQIGNGYAPV	29.96	1469.67	14	0.6	735.844	22.99	11700000
VFIDHPS	29.93	813.402	7	0	407.708	18.04	10700000
SVFNQVPLANP	29.93	1184.62	11	1.5	593.318	49.44	121000000
SQQQQLLPFNQLA	29.92	1513.79	13	0.5	757.902	55.15	118000000
KDEMIDI	29.88	862.411	7	0.3	432.213	27.62	10400000
FFQQPF	29.87	812.386	6	-0.4	407.2	48.38	21100000
LVNNIATM(+15.99)LPNV	29.87	1313.7	12	-1.5	657.857	51.29	20800000
YPHQQPPI	29.85	978.492	8	1.2	490.254	18.81	50500000
LVNNIATMLPN	29.83	1198.64	11	-1.3	600.325	51.34	322000000
YQMVQQQQPPYGGGVQGQ	29.83	1991.92	18	1.5	996.967	35.96	348000000
KPFFPGLVE	29.83	1032.56	9	0.3	517.29	43.51	4390000
AVAHDVPIPG	29.82	974.519	10	-0.7	488.266	21.51	56600000
FSAPIRPD	29.8	901.466	8	-1.4	451.74	21.73	14700000
ANPAAFWQQQQ	29.77	1287.6	11	-0.9	644.807	45.1	13600000
ALLSDPSFRPL	29.75	1214.67	11	0	608.34	48.01	19300000
IAIKPDGV	29.74	811.48	8	-0.8	406.747	20.87	9260000
AMFLPQ	29.73	705.352	6	-0.7	353.683	38.59	25600000
DFVPPPPTSIPKPDT	29.72	1606.82	15	0.1	804.419	43.84	155000000
AFLQ(+.98)QPIVGS	29.71	1059.56	10	1.4	530.788	48.15	20900000
SSVFNQVALANPI	29.69	1358.72	13	-0.3	680.367	55.5	8780000
AYWQQQQLRPF	29.67	1463.73	11	0.9	732.873	45.44	3840000
ALTSPIAHWQQQQLVS	29.59	1805.94	16	0.3	903.979	46.99	2300000
FELDKPDFDPI	29.59	1334.64	11	0.1	668.327	53.92	28800000
NPYLQQP	29.54	858.423	7	-0.2	430.219	24.05	8290000
IM(+15.99)IKPDGV	29.52	887.479	8	-0.5	444.746	21.19	14500000
LQ(+.98)QPWTSPL	29.51	1069.54	9	-0.3	535.779	52.35	29600000
QSIMAQQHQVLSPFSR	29.51	1855.94	16	-1.7	619.652	32.64	0
RSSFDFIDG	29.49	1042.47	9	0.8	522.244	39.95	11100000
RELPQQLRPGHI	29.48	1442.81	12	-0.7	481.944	19.48	6770000
LALTSPFA	29.47	818.454	8	0.1	410.234	51.32	4030000
VFNQVPL	29.47	815.454	7	-0.3	408.734	38.99	28500000
EKVVIIPDH	29.47	1048.59	9	-0.3	525.303	19.87	3000000
FDRDDNGIIYPWE	29.45	1638.73	13	0.2	820.373	54.45	18700000
GILAPSPV	29.44	752.443	8	-0.2	377.229	35.42	15900000
WQLIFTT	29.43	907.48	7	-0.4	454.747	53.45	99900000
DASDSLGFGPP	29.41	1061.47	11	-0.9	531.74	52.68	8630000
VNIHFPPDYPFKPPK	29.4	1794.95	15	0.3	449.744	45.26	27700000
FLQQPIVG	29.37	900.507	8	-1.2	451.26	36.81	578000000
YWQHQQLLPFNQ	29.36	1600.78	12	0.3	801.397	48.08	34200000
LQQQYLAHLTLQSIMAQQHQVLSP	29.34	2774.45	24	0.2	925.825	55.49	41000000
QQQSLSHLTVQSITAQQQRILSPLNQLA	29.34	3129.69	28	-0.1	1044.24	55.01	29800000
LAPEHPLPA	29.33	943.513	9	0.4	472.764	19.55	4420000
LAPEHPIPA	29.33	943.513	9	0.4	472.764	19.55	4420000
FAFSDYPE	29.33	974.402	8	0	488.208	48.49	419000000
FRLPENA	29.29	845.439	7	-0.8	423.727	22.95	29500000
HWHGHQPGKPDWSEGS	29.27	1840.8	16	0.7	614.609	14.86	13300000
KNEGFVEV	29.25	920.46	8	-1	461.237	21.76	8130000
AGQIIPW	29.23	783.428	7	-0.4	392.721	41.05	114000000
LSLGVAGSQPGIEG	29.23	1283.67	14	-0.7	642.843	44.91	121000000
VRMDTPSGI	29.21	974.486	9	0.6	488.25	22.43	30300000
YVLPAPR	29.18	814.47	7	-2	408.241	21.14	458000000
YVIPAPR	29.18	814.47	7	-2	408.241	21.14	458000000
ERGITIDIA	29.17	986.54	9	0.3	494.277	31.05	0
IDHPSFLE	29.17	956.46	8	0.3	479.238	30.87	0
FHPEIEE	29.16	899.403	7	-1	450.708	20.62	8550000
MLQQPWTSPL	29.16	1199.6	10	-0.4	600.807	53.91	347000000
HQVLSPF	29.1	826.434	7	-1	414.224	26.19	323000000
SPLAQWQQQQ	29.06	1212.59	10	0.6	607.302	33.74	11200000
LNDFPRP	29.06	857.439	7	0.1	429.727	22.04	15600000
EAMPPLEEGPY	29.05	1231.54	11	0	616.779	46.75	131000000
VIVEKPFG	29.04	887.512	8	-1.5	444.762	23.79	9860000
LGYGNPIVQPY	29.04	1219.62	11	-0.5	610.819	48.96	584000000
FVRPEL	29.04	759.428	6	-0.3	380.721	23.02	54500000
WTPRMMP	29.02	917.425	7	-1.3	459.719	29.15	9060000
SMGVMRPEL	29.01	1018.49	9	0.1	510.254	28.37	5140000
SRTPGHPENFETPGVE	29	1752.81	16	0.4	585.276	20.81	4900000
RDFIPEEE	28.98	1033.47	8	0.9	517.744	25.04	4750000
TLHIVGPD	28.97	850.455	8	-0.5	426.235	21.8	46200000
MFLPQQSALLQQQSLSHLTVQ	28.97	2396.25	21	-0.8	1199.13	55.15	90700000
FGFTTEHA	28.95	908.403	8	0.3	455.209	22.94	14300000
VIPGPGDKPM	28.95	1009.53	10	0.6	505.771	20.42	54800000
WEGEFFPGIPK	28.95	1305.64	11	-0.3	653.827	52.7	11000000
GIHIADSIPI	28.92	1034.58	10	1.4	518.296	43.41	63300000
EHPIVQSYRLQQALAASILPS	28.91	2320.25	21	-1.2	774.424	53.76	7400000
QQQTLLPF	28.9	973.523	8	0	487.769	54.07	10700000
MLQQPWTSPLQQ	28.9	1455.72	12	0.6	728.867	52.43	83000000
ANPYLQQPF	28.89	1076.53	9	0.3	539.272	47.79	567000000
LMQQSPL	28.87	815.421	7	-0.4	408.718	26.01	51600000
GGLGDVLGGLPPA	28.85	1121.61	13	0.7	561.812	56.18	3750000
LHVNGGVIVNG	28.84	1077.59	11	-1.4	539.803	23.09	7010000
LFFRPEQ	28.83	935.486	7	-0.9	468.75	26.95	5930000
AFQSEGLRPT	28.82	1104.56	10	2	553.287	19.72	3000000
DIGEGFGH	28.81	830.356	8	-0.8	416.185	22.66	3870000
RFDGVTSM	28.8	911.417	8	0.1	456.716	22.28	14700000
GSFGYHVTNFFAPSS	28.76	1616.73	15	0.1	809.37	52.49	33200000
ALASPLAHLQQQALVA	28.74	1629.92	16	0.8	815.968	48.77	96600000
M(+15.99)GIIDVDPK	28.74	1002.51	9	0.2	502.26	23.09	6120000
GMDVSEWDPSKDK	28.71	1492.65	13	-0.9	747.332	29.21	19000000
FLELNPR	28.71	887.486	7	-0.3	444.75	25.88	385000
LQQQTLLPF	28.7	1086.61	9	0.9	544.311	55.63	142000000
TALGYGNPIVQPY	28.69	1391.71	13	-0.3	696.861	51.62	120000
M(+15.99)LQQ(+.98)PWTSPLQQYWTPR	28.68	2176.04	17	7.8	1089.04	55.93	4020000
IIM(+15.99)NHPGQIGNGYAPV	28.65	1695.84	16	-0.2	848.927	29.6	8780000
RFDGMFAPE	28.63	1068.47	9	-0.8	535.242	36.51	9600000
WQQQQLLP	28.55	1039.55	8	-0.7	520.779	43.83	153000000
YRLQQALA	28.55	961.534	8	-0.9	481.774	22.39	18600000
MVEPGHLDQ	28.55	1024.46	9	8.9	513.244	18.8	7510000
NQEVFVHPR	28.53	1124.57	9	-0.5	375.865	20.74	143000000
MLVNDLIHG	28.52	1010.52	9	0	506.268	41.58	44000000
ANVETFPGVNTLGVSLAR	28.5	1843.98	18	0.7	922.997	52.65	2880000
IFSHPADFTPV	28.46	1229.61	11	-0.6	615.811	38.7	5730000
PAPPPVGPAEGSV	28.45	1173.6	13	-1	587.808	28.97	13800000
SVFNQVALANPI	28.45	1271.69	12	0.2	636.851	55.54	12700000
VGAEMAPW	28.42	859.39	8	-0.2	430.702	43.01	34400000
TSPFAQLQQQQLVSSV	28.38	1759.91	16	0.5	880.963	55.24	15500000
PQYLPH	28.38	753.381	6	-0.4	377.698	28.35	265000000
ALASPVTQLQQQQL	28.38	1523.83	14	-1.6	762.921	48.81	44300000
FVLLAGQLP	28.36	956.569	9	0	479.292	54.22	4570000
QQQQLVSSVFNQVA	28.35	1574.81	14	-0.9	788.409	53.26	37000000
LLPNVFNQ	28.35	943.513	8	-0.1	472.764	49.9	155000000
LPQQSALLQQQ(+.98)SLSHLTVQSITAQQQR	28.35	3031.61	27	0.8	1011.54	50.61	12300000
ALPVHDGGVGFD	28.34	1182.57	12	-0.2	592.291	31.3	79900000
LGLGFQPK	28.34	858.496	8	-1.5	430.255	24.22	4660000
ALVGDFNNWDPN	28.32	1360.6	12	-0.2	681.309	54.87	52500000
IYRPDTGEI	28.31	1062.53	9	-0.7	532.274	24.15	6430000
FLPQQSALLQQQSLSHLT	28.29	2038.08	18	-2	680.367	51.02	18600000
ASGILAPSPV	28.28	910.512	10	-0.1	456.263	35.16	852000000
LASGILAPSA	28.27	898.512	10	-1.4	450.263	33.49	8500000
QPLSPPVLS	28.24	936.528	9	-1.6	469.271	37.06	23000000
LQQQ(+.98)QLLPNV	28.24	1180.65	10	-2.8	591.328	48.57	16700000
ALPAPPLRPL	28.24	1043.65	10	0.3	522.832	36.82	0
DFIDGYEKPV	28.22	1181.56	10	0.3	591.788	41.13	244000000
VFSAPIRPDV	28.21	1099.6	10	-0.7	550.808	32.34	0
FDLFRPT	28.17	894.46	7	-0.6	448.237	40.54	6650000
SPFAQLQQQ	28.15	1045.52	9	-0.4	523.767	32.71	0
QQLFPW	28.14	817.412	6	-0.2	409.713	47.64	508000000
AFLHQPIVGSA	28.13	1138.61	11	-0.1	570.314	32.32	4990000000
QQQ(+.98)QFLPNV	28.13	1101.55	9	-0.6	551.78	45.89	4670000
IRTPEDLDA	28.1	1028.51	9	-0.7	515.264	21.6	42500000
QQPFAGVPF	28.09	989.497	9	-0.3	495.756	53.63	182000000
MDVSEWDPSKD	28.02	1307.53	11	0.8	654.775	39.08	65500000
YWTPR	28	721.355	5	-0.7	361.684	19.25	11400000
LFSPVLVPAA	28	1012.6	10	0.3	507.305	54.63	6170000
IFSPVLVPAA	28	1012.6	10	0.3	507.305	54.63	6170000
AFTIGGSPVLA	28	1031.57	11	0.6	516.79	52.17	18300000
STRPEGDLGPL	27.99	1140.58	11	-0.2	571.296	24.82	34400000
LAHLTLQSIMAQQHQVLSPFSR	27.94	2504.33	22	-1.1	627.09	52.47	0
LVNDLIHGLYPEA	27.93	1452.76	13	-0.7	727.387	53.58	57000000
LQQQSLSHLTVQSITAQ(+.98)QQ	27.91	2138.1	19	9.5	1070.07	41.44	5150000
SPLAQWQQQQLVS	27.91	1511.77	13	0.7	756.894	49.77	32900000
DREEIAEIEK	27.91	1230.61	10	2.5	616.313	18.53	2030000
SVQAPGAIP	27.9	838.455	9	-0.8	420.234	25.68	15400000
NQVGLANPI	27.9	924.503	9	1	463.259	33.86	18200000
AFLQQQQLLPFNQLA	27.9	1757.95	15	3.1	879.983	56.28	8280000
QQQSLSHLTV	27.89	1139.59	10	-0.5	570.804	22.02	5710000
SLDIERPT	27.82	929.482	8	-0.7	465.748	20.48	22600000
FDRDDNGIIYPWET	27.82	1739.78	14	-1.1	870.896	54.57	13400000
VVADSIHDV	27.82	953.482	9	-0.5	477.748	20.28	8340000
FVDPPPLDA	27.81	969.481	9	0.2	485.748	41.01	17000000
LQQPWTSP	27.81	955.476	8	0.4	478.746	34.63	11700000
DKLWPM	27.81	788.389	6	-0.3	395.202	39.95	0
RLTGITGIV	27.81	928.571	9	-0.2	465.292	31.53	77600000
GNVVMDIPHA	27.79	1051.51	10	1.4	526.764	31.48	14100000
GVAGSQPGIEGEEIAPL	27.77	1622.82	17	0.2	812.415	50.71	349000000
SPFAQLQQQQ	27.71	1173.58	10	-1.6	587.795	32.99	2450000
AFVVVGDNDGH	27.7	1128.52	11	0.7	565.268	24.19	7910000
FNAALAHHIMAGAD	27.69	1437.68	14	1.1	480.235	28.72	24200000
ALGYEHPI	27.68	898.455	8	-0.1	450.235	21.88	30500000
VEGIDVKPES	27.67	1071.54	10	-0.7	536.779	20.59	5950000
WQQQQFLPNVFNQLALTSPF	27.66	2405.22	20	-0.2	1203.62	56.4	1060000
RWPYGPV	27.65	873.45	7	0.3	437.732	31.09	2700000
AIEGVDVKPEL	27.64	1168.63	11	0.7	585.325	35.84	0
LPFPPR	27.63	725.422	6	-0.1	363.718	22.15	84700000
ATMLPNVFNQ	27.63	1133.55	10	0	567.784	53.68	120000000
DGYEKPVEGRKINW	27.62	1689.85	14	-1.7	845.929	50.25	211
YAEELISGIA	27.62	1064.54	10	-0.6	533.276	52.04	19800000
SVGEGVTDVAPGDHVLPV	27.62	1746.88	18	1.5	874.448	46.45	147000000
TTLLPNV	27.6	756.438	7	-1.1	379.226	40.71	56900000
AMNPCM(+15.99)QYC	27.59	1075.36	9	0	538.687	19.66	24900000
IVHPFPLP	27.58	918.533	8	-0.2	460.274	37.32	11300000
AM(+15.99)FLPQ	27.58	721.347	6	-0.7	361.68	38.86	36700000
SPVAQLQQQQLVSNVFNQ	27.57	2027.04	18	0	1014.53	55.22	6330000
MM(+15.99)PSMMP	27.56	839.305	7	-0.6	420.659	36.94	4640000
QQQYLAHLTLQSIMAQQHQVLSP	27.53	2661.37	23	0.1	888.131	54.4	14800000
FWSQATSI	27.53	938.45	8	0.2	470.232	43.12	9980000
YQMVQQQQPPYGGGVQG	27.52	1863.86	17	0.2	932.936	36.15	332000000
MVWEGEGVIK	27.48	1146.57	10	-1	574.294	35.86	8080000
AFLQQPI	27.47	815.454	7	-0.9	408.734	40.9	505000000
VPITVIKPI	27.47	978.648	9	1	490.332	32.95	4860000
IIDTPGLRPSV	27.47	1166.67	11	0.2	584.34	30.89	57500000
VMVVVPR	27.47	798.479	7	-1	400.246	21.48	4760000
HHIMAGAD	27.46	850.375	8	2.2	426.196	9.46	51500
IREADVDGDGQIN	27.45	1400.65	13	-0.9	701.333	20.59	2480000
LREADVDGDGQIN	27.45	1400.65	13	-0.9	701.333	20.59	2480000
V(+42.01)SATSTHTCPCHQQ(+.98)PPPQTYPH	27.45	2459.06	22	-6.5	615.769	13.07	842000
LQQQQQLLVNPI	27.45	1420.8	12	0.2	711.409	49.36	11100000
AHVTVQSITAQ	27.44	1153.61	11	-0.4	577.812	20.42	27700000
FFGAPGSMLPQ	27.44	1150.55	11	0.2	576.281	55.04	17600000
FGIHGLWPN	27.43	1039.52	9	-1.2	520.769	49.99	255000000
LGEDGPTHQPVEQ	27.42	1405.65	13	0.2	703.831	17.46	635000
KEISDDEDEEDKKDEEGKVE	27.41	2365.03	20	2.9	592.266	12.78	257000
NPYLQQPFIGGA	27.4	1303.66	12	3.6	652.838	52.1	11000000
RDPAEIPW	27.4	982.487	8	5.1	492.253	36.59	18200000
LQQQLSPL	27.38	925.523	8	0.2	463.769	32.32	109000000
NADFVRPEL	27.36	1059.53	9	0.3	530.775	31.27	39200000
LIDLSNKPE	27.36	1027.55	9	-0.5	514.784	21.99	80700000
RQQLLPFN	27.34	1014.56	8	-0.4	508.288	31.62	8500000
ILSPLNQ	27.33	783.449	7	-0.8	392.731	30.09	0
GLPIRPDVPL	27.31	1075.64	10	-1.3	538.826	41.24	11400000
YSLPALNDPR	27.31	1144.59	10	0.8	573.302	34.79	14300000
FRDIWPS	27.3	919.455	7	-1.2	460.734	35.66	22100000
WRQPF	27.28	732.371	5	-0.5	367.192	24.08	6860000
QLPQLRSITM	27.25	1185.65	10	-8.9	593.829	48.1	40800000
IWTGFKPPV	27.17	1043.58	9	0.7	522.798	41.42	21000000
VQQQQPPYGGGVQ	27.15	1384.67	13	1	693.345	21.33	6640000
IAVDMVNEGLVER	27.14	1443.74	13	-2.5	722.875	41.1	361000
VMVVMPR	27.11	830.451	7	0.2	416.233	22.07	0
GIHGLWPN	27.09	892.456	8	0	447.235	31.16	157000000
LFSPVLVPA	27.09	941.559	9	0.4	471.787	54.03	52100000
IFSPVLVPA	27.09	941.559	9	0.4	471.787	54.03	52100000
LVAFHPAAPT	27.08	1022.55	10	1.3	512.285	23.49	27300000
QQQQFLPNVFNQLALTSPF	27.06	2219.14	19	0.3	1110.58	56.38	0
RVVIGPSVSDEEA	27.05	1356.69	13	1.7	679.353	25.01	5070000
WVDGWDDPR	27.05	1144.49	9	-0.6	573.254	36.9	23900000
DIEAYKPGTN	27.04	1106.52	10	-0.6	554.269	20.86	7340000
FLQQ(+.98)PIIGS	27.03	1002.54	9	-0.5	502.276	47.41	12500000
FLPQQSALLQQQSLSH	27.03	1823.95	16	-0.5	912.983	42.3	41500000
YWGDLSGHP	27.01	1030.45	9	1	516.233	32.17	422000000
ANPYLQQP	27.01	929.461	8	-0.4	465.737	25.18	71500000
SPVTQLQQQQLVS	27.01	1454.77	13	1.1	728.394	39.68	40600000
PDVLAW	27	699.359	6	-0.7	350.687	41.69	21700000
LREQFPGA	26.99	916.477	8	-0.8	459.245	20.69	2720000
IKPDPDAGTIT	26.97	1126.59	11	0.2	564.301	19.5	11500000
SILSSPAMSLQQQSALWQH	26.96	2111.05	19	0.9	1056.53	54.58	4740000
TALGYEHPI	26.96	999.503	9	0.5	500.759	22.92	12900000
LPPFGESHGP	26.94	1036.5	10	-0.1	519.256	24.19	0
SGLHIDPY	26.93	900.434	8	0.1	451.224	25.94	34600000
ADVEAPAEEHPGQ	26.92	1348.59	13	1.7	675.303	16.82	2380000
GLEVKPW	26.92	827.454	7	-0.8	414.734	29.41	11500000
ALGYGNPIVQP	26.88	1127.6	11	0.6	564.806	42.75	755000000
YGFMTDDHQ	26.87	1112.42	9	-1.1	557.218	25.71	16700000
QYAAGLPM	26.87	849.405	8	-0.7	425.71	37.24	17100000
LRINPLAAMNPT	26.87	1309.72	12	0.1	655.866	45.11	32000000
YEEAMPPLEEGPYG	26.84	1580.67	14	-0.9	791.342	51.73	273000000
FRTDIQTPG	26.84	1033.52	9	-0.1	517.767	21.52	15900000
ITHSVPF	26.83	799.423	7	-1.5	400.718	21.51	8940000
VDRPEGADPEE	26.83	1212.53	11	3.1	607.272	14.07	239000
MFLPQQSALLQ	26.82	1274.67	11	-0.5	638.342	54.59	39800000
WTAAFPR	26.81	847.434	7	-0.6	424.724	25.97	13600000
WQHQSLASPAA	26.81	1194.58	11	-0.5	598.296	20.5	31800000
LLGDVQVYPE	26.8	1131.58	10	0.5	566.798	49.71	70700000
VDKEDEEEDGEAGDGDED	26.8	1951.69	18	2.2	976.856	14.94	5410000
AHWQQQQLVSSVFNQ	26.78	1798.88	15	0.8	900.446	47.75	10900000
AFLHQPIVGSAL	26.76	1251.7	12	0.4	626.856	46.53	4120000000
FRQQLLP	26.75	900.518	7	0	451.266	24.29	1060000000
LLDPPLHEFLPDG	26.73	1461.75	13	-0.8	731.882	54.92	34200000
LPFNQLA	26.7	801.438	7	-1.7	401.726	41.49	111000000
SIVLRPLEPAPI	26.7	1303.79	12	0.7	652.901	46.66	5680000
VVPGFGHGV	26.69	867.46	9	-0.8	434.737	22.99	8220000
M(+15.99)HQQPPYGGVP	26.67	1225.55	11	0	613.785	19.75	11000000
LQQQSLSHLTVQSITAQQQRILSP	26.66	2703.47	24	0.6	902.163	49.71	28300000
IIKVPIDV	26.66	895.574	8	-0.2	448.794	37.4	5520000
AQLQQQQLVSSVLNQ(+.98)VGLANPITAA	26.64	2591.39	25	5.5	1296.71	57.46	2300000
VRPPLVDM(+15.99)	26.62	941.5	8	-0.9	471.757	20.24	6150000
IGTMIEIP	26.62	872.468	8	-0.6	437.241	52.41	12500000
IHFPW	26.61	698.354	5	-0.6	350.184	43.56	910000
LHFPW	26.61	698.354	5	-0.6	350.184	43.56	910000
SLIDKAHELG	26.61	1081.58	10	-0.2	541.795	22.78	7390000
REFADNVLP	26.59	1059.53	9	-0.7	530.774	32.29	38300000
FNIVSPGADM	26.53	1049.49	10	-1	525.749	49.76	10700000
QQQQLLPL	26.53	966.55	8	-0.3	484.282	43.81	330000000
LKTPASDVDE	26.52	1073.52	10	-0.4	537.769	17.26	4790000
HGSLGFLP	26.5	826.434	8	-0.4	414.224	33.94	24300000
RLTGITGIVN	26.5	1042.61	10	0.7	522.314	27.97	29300000
NQLALTSPL	26.49	955.534	9	0.3	478.774	43.6	8730000
NQLALTSPI	26.49	955.534	9	0.3	478.774	43.6	8730000
LRPVDPSVS	26.47	968.529	9	1	485.272	18.2	2860000
QLLVNPIA	26.42	866.523	8	-0.3	434.268	44.23	6960000
YRLQQALAASILPSSAM	26.42	1818.97	17	0.4	910.491	54.7	8660000
THVPWHL	26.42	888.461	7	-2.5	445.236	23.02	3290000
VNNIATMLPNV	26.37	1184.62	11	-0.2	593.318	54.09	536000000
WQHQQLLPFNQLAVEN(+.98)A	26.32	2036.01	17	7.1	1019.02	53.93	0
RLQQALAASILSSP	26.3	1453.83	14	-1.1	727.919	42.09	122000000
LTGITGIVN	26.27	886.512	9	-0.1	444.263	39.87	17800000
QQQSLSHLTVQ(+.98)SITAQQQRILSPL	26.26	2704.45	24	6.8	902.497	52.49	6820000
AYTLIFVTVP	26.25	1122.63	10	-0.7	562.323	42.39	0
ALASGILAPSAV	26.25	1068.62	12	0.2	535.316	48.09	75500000
EELRFPA	26.2	860.439	7	-0.6	431.227	26.95	14400000
SAMNPAAFWQQQQLLR	26.2	1887.94	16	0.1	944.978	54.4	99600000
LTGITGIVNG	26.19	943.534	10	-0.2	472.774	40.76	145000000
QQLSPLNPLA	26.17	1079.6	10	-0.5	540.806	46.96	15000000
YEHPIVQS	26.16	971.471	8	2.1	486.744	16.04	629000
IGPLGLSPK	26.16	880.538	9	-0.2	441.276	24.29	94400000
FRVPTVD	26.15	832.444	7	-1.3	417.229	26.21	128000000
FVLDRLE	26.14	890.486	7	0.3	446.25	35.72	14600000
EEAMPPLEEGPYG	26.08	1417.61	13	0.8	709.811	48.41	65300000
LQQQ(+.98)TLLP	26.07	940.523	8	-0.4	471.269	38.68	4530000
YMVHWPV	26.04	930.442	7	0.4	466.228	43.04	2810000
NQVALANPYLQQP	26.03	1454.75	13	0.6	728.384	46.52	244000000
DLGATRPW	26.01	914.461	8	8.9	458.242	26.88	0
QLLPLNPL	25.96	906.554	8	-0.2	454.284	55.63	946000000
YHGMQE	25.95	763.296	6	0.8	382.656	10.9	28700
ALASPLAHLQQQA	25.95	1346.73	13	-0.6	674.372	32.53	53400000
RETDADITVA	25.94	1089.53	10	-0.1	545.772	18.53	3950000
LRVNPLA	25.93	781.481	7	-0.5	391.748	21.76	21500000
AAIPQYLPHVT	25.93	1208.66	11	0.6	605.335	38.24	19900000
QLPFNPL	25.93	827.454	7	-0.5	414.734	52.73	28100000
HLVLVGPA	25.92	804.486	8	-0.1	403.25	23.05	21800000
LSLHDPVLPL	25.9	1102.64	10	-0.1	552.327	50.81	9170000
KPGTNLTYPI	25.87	1102.6	10	-0.6	552.308	26.08	52000000
SHGLPVDPI	25.86	933.492	9	2	467.754	28.78	3700000
SQQQQLLP	25.86	940.498	8	-0.3	471.256	26.98	234000000
AVLIQQPLA	25.86	951.575	9	-1	476.795	38.67	13800000
ELDLDEVEPSISGPK	25.85	1626.8	15	2.2	814.409	47.78	22800000
FRDEVLP	25.82	874.455	7	-0.8	438.234	24.85	10400000
SPIAHWQQQQL	25.81	1334.67	11	-0.1	668.344	29.3	3950000
AFTIGGSPL	25.8	861.46	9	-1	431.737	49.53	182000000
QLPSMFNPM(+15.99)	25.79	1079.48	9	-0.4	540.746	48.04	22000000
IMQQQQLPS	25.78	1071.54	9	-0.1	536.776	22.98	169000000
SLGVAGSQPGIEGE	25.77	1299.63	14	-0.8	650.822	33.56	51000000
ISISLSPK	25.75	843.506	8	-1.4	422.76	23.99	3740000
LSLSLSPK	25.75	843.506	8	-1.4	422.76	23.99	3740000
IMAQQHQVLSPF	25.75	1397.71	12	0	699.864	36.31	8710000
IFGHEAGGIIE	25.74	1141.58	11	0.4	571.796	33.48	4570000
FGGLGGGAEPVPV	25.73	1155.59	13	0.1	578.803	48.48	40400000
FLPQ(+.98)QSALLQQQSLSHLT	25.7	2039.07	18	9.4	1020.55	50.9	74700000
ILVDGSHDIE	25.69	1096.54	10	-1	549.277	26.49	38300000
MFLFPQ	25.68	781.383	6	0.3	391.699	55.83	10700000
WQQQQLVNQLA	25.67	1354.7	11	1.5	678.358	46.78	27200000
SSYSPLLPLPK	25.66	1200.68	11	-0.4	601.345	40.8	19400000
SHINIVV	25.65	780.449	7	-0.3	391.232	22.08	13100000
IGGIGTVPVG	25.63	868.502	10	0.3	435.258	36.5	61800000
IATM(+15.99)LPNV	25.61	873.463	8	0.7	437.739	36.47	0
RHASEGGHGPHWPLPPFGES	25.61	2151	20	-0.5	538.758	27.29	0
QQPFAGVP	25.61	842.429	8	-1.9	422.221	32.28	0
MDVSEWDPS	25.61	1064.41	9	-0.8	533.213	48.54	10900000
M(+15.99)VQQQQPPYGGGVQGQ	25.6	1716.79	16	-2.3	859.4	22.75	20900000
VPVFN(+.98)GGDGK	25.6	989.482	10	-0.7	495.748	20.63	4280000
RPGADVGAAATLLIGSAAGAIASTATFP	25.59	2526.34	28	-0.4	1264.18	57.99	0
TLPFQQ	25.58	732.381	6	-0.2	367.197	31.52	9460000
HAFIDGVD	25.57	872.403	8	1.7	437.209	24.79	1270000
YWQQQQLLPN	25.57	1316.65	10	0.4	659.333	47.28	133000000
GNPIVQP	25.54	723.391	7	-0.5	362.703	20.74	4770000
QMVQQQQPPYGGGVQGQQVGV	25.53	2212.07	21	-1.2	1107.04	39.61	68200000
HVAGGNILPL	25.51	989.566	10	0.2	495.79	32.25	13800000
GLPASPGAAVG	25.5	895.476	11	-1.6	448.745	25.77	3350000
IVSSIEQKEES	25.5	1247.62	11	1.5	624.821	15.8	1040000
GATPPVSTDV	25.48	942.466	10	0.3	472.24	23.08	17200000
RLNPDLQQQLPKP	25.47	1545.86	13	0.5	773.939	27.62	3320000
ALTSPFAQLQQQ	25.47	1330.69	12	0.3	666.352	50.99	23100000
IYGPDAGVDYKDNQ	25.44	1553.7	14	0.6	777.858	27.67	20300000
ILDADVTDSV	25.42	1046.51	10	-0.6	524.264	43.2	8910000
FGHNEIDEPSFTQPK	25.42	1744.81	15	-0.8	582.609	26.8	16600000
HFIVPELGPN	25.41	1121.59	10	-3.2	561.799	42.01	46900000
AQLQQQQLVSSVLNQVGLANPITAA	25.4	2590.41	25	-0.2	1296.21	58.74	0
LKAPLGGL	25.39	767.49	8	-0.5	384.752	26.25	9300000
PVHDGGVGFD	25.39	998.446	10	-0.9	500.23	19.34	16800000
AFLQ(+.98)QPIVG	25.38	972.528	9	-0.2	487.271	48.51	8390000
SFDFIDGYEKPV	25.38	1415.66	12	-1.1	708.837	51.94	10500000
LQQQTLLPFNQLALANPA	25.38	1979.08	18	3	990.552	57.73	33100000
VFLQQQSALLQQQ	25.36	1529.82	13	0.7	765.918	48.69	249000000
IKNPNPVPIPL	25.34	1200.72	11	-1	601.368	37.15	11000000
NQLALANPI	25.34	952.534	9	-0.5	477.274	41.66	110000000
QMVQQQQPPYGGGVQGQQVGVVA	25.33	2382.18	23	0.8	1192.1	42.06	89000000
LQQQSLSHLTVQSITA	25.31	1752.94	16	-0.2	877.476	40.64	42800000
VNVSELAVEELRVPE	25.27	1681.89	15	3.7	841.955	54.36	3800000
MFLPQQSALLQQQ	25.22	1530.79	13	-0.5	766.4	53.52	361000000
LQQQQLLPNVFNQLALASPV	25.2	2220.23	20	-0.6	1111.12	58.21	12100000
FLPQQSALLQQQSLSHLTVQ	25.13	2265.21	20	-0.1	1133.61	52.5	55500000
QHQQLLPFNQL	25.09	1364.72	11	-0.4	683.367	46.57	32400000
RINPLATM(+15.99)NPA	25.09	1212.63	11	0.3	607.322	20.99	8420000
IILAGDHL	25.06	850.491	8	-1.1	426.252	28.68	51000000
LILAGDHL	25.06	850.491	8	-1.1	426.252	28.68	51000000
SLFLPPM	25.06	803.425	7	-1.1	402.719	52.54	4600000
LGPFLGAGVAG	24.95	957.528	11	-0.5	479.771	50.11	5850000
ILVDKEDEE	24.94	1088.52	9	1	545.27	17.22	19400000
DLQEDFMGGAE	24.9	1210.48	11	0.3	606.248	54.81	9560000
SVLNQVGLANPI	24.9	1223.69	12	0.1	612.851	53.66	168000000
QRTPDYVEE	24.9	1135.51	9	0.8	568.765	17.11	1280000
VIIDVQPK	24.9	910.549	8	-0.2	456.281	21.6	13600000
FVLVPQ	24.88	701.411	6	-1	351.712	39.08	238000000
NVVMDIPHA	24.88	994.491	9	-0.3	498.252	31.41	2070000
FGAPYDGVHWD	24.87	1262.54	11	0.2	632.275	46.25	10800000
EHLDIPE	24.86	851.403	7	-0.4	426.708	22.42	9260000
ILSEEFGWDKD	24.83	1337.61	11	-0.5	669.814	45.75	26100000
FIVPELGPNT	24.83	1085.58	10	-1.1	543.794	53.7	7210000
AHLTLQSIMAQQHQV	24.83	1703.88	15	-1	568.966	37.48	2250000
PELNLPE	24.82	810.412	7	0.4	406.214	36.22	15600000
VFVPPHPL	24.81	904.517	8	-0.2	453.266	29.08	20200000
TPHSVPIGP	24.75	903.481	9	-1.2	452.747	19.91	48900000
LEVPDITE	24.75	914.46	8	-1.4	458.236	46.5	1620000
YLPQATTTLLPNV	24.75	1429.78	13	-0.2	715.898	55.36	114000000
LALASPLAHLQQQA	24.73	1459.81	14	1.2	730.915	43.07	33400000
AAAPIPQ(+.98)YLP	24.72	1040.55	10	-5.8	521.281	44.76	3430000
YLQQQQLLPL	24.7	1242.7	10	0	622.356	54.42	186000000
LLNPATGVAYVLP	24.66	1326.75	13	-0.5	664.384	55.35	20300000
NKQPTEFFCKTLTASDTSTH	24.65	2255.05	20	-3.2	564.769	12.45	514000
TINVAKPP	24.64	838.491	8	1.1	420.253	31.38	1800000
VDKEDEEEDGEAGDGDEDK	24.62	2079.79	19	1.9	694.271	11.89	1770000
NRFEGAVPA	24.61	959.482	9	-0.5	480.748	19.07	10700000
LGPITPLPD	24.6	921.517	9	-2.1	461.765	45.63	65000000
RNRPQFLVGATSV	24.6	1443.79	13	-0.2	722.904	24.49	0
MFLPQ(+.98)QSA	24.58	921.427	8	-0.8	461.72	37.3	10200000
ELGLPIRPDVP	24.58	1204.68	11	2.2	603.349	47.41	55600000
LPVSSFSIAA	24.56	990.539	10	-0.1	496.276	47.02	11100000
FVTVDKDAPI	24.55	1103.59	10	-0.4	552.8	29.65	27900000
TSLPKPGGGEYG	24.54	1161.57	12	-6.7	581.787	20.86	38600000
SFIVPSHTDA	24.54	1072.52	10	0	537.267	22.93	7890000
WQHQ(+.98)QLLP	24.51	1049.53	8	1.8	525.773	31.47	64400000
SPRGSPVP	24.49	795.424	8	8.3	398.723	25.6	0
FLHQPIVGSAL	24.48	1180.66	11	-0.3	591.337	40.85	418000000
IVFKPLE	24.46	844.506	7	-0.2	423.26	28.41	9750000
LALANPIT	24.45	811.48	8	-1.3	406.747	38.62	39700000
GTIEVAGTDKETT	24.44	1320.64	13	2.8	661.33	17.42	2470000
QFLPNV	24.44	716.386	6	-0.7	359.2	41.65	342000000
LADLNEDLK	24.43	1029.53	9	-1	515.774	19.92	12400000
SAM(+15.99)FLPQ	24.41	808.379	7	-0.9	405.196	28.99	8510000
FDRPFDA	24.4	866.392	7	-0.6	434.203	24.89	0
AAVLPDLDIK	24.38	1053.61	10	-0.4	527.811	40.43	46100000
MMPSMMP	24.36	823.31	7	-0.5	412.662	40.81	668000000
WTGLLPK	24.29	813.475	7	0.3	407.745	27.97	0
SMMLQQPWTSPL	24.28	1417.67	12	3.2	709.846	56.24	593000
NTGPSLVPGVIV	24.27	1151.65	12	0.4	576.835	54.1	10400000
KNDFGSIDI	24.25	1007.49	9	-1.1	504.753	36.6	6610000
IM(+15.99)NHPGQIGNGYAPV	24.25	1582.76	15	0.5	792.386	25.87	15600000
WQQQQ(+.98)LLPN	24.23	1154.57	9	5.6	578.297	41.95	11700000
DREIDIGVPDEVG	24.23	1412.68	13	-0.8	707.346	45.31	2990000
RETVVEVPN	24.22	1041.55	9	0.4	521.78	19.42	3370000
VVEDIGVVKPTE	24.21	1283.7	12	0.5	642.856	27.28	9390000
SILSSPAMSLQQQSALWQHQSLASPAA	24.18	2836.42	27	0.5	1419.22	55.58	48100000
SFVDGHH	24.18	797.346	7	0.9	399.68	10.2	40000
INPLATM(+15.99)NPA	24.1	1056.53	10	-1.2	529.27	27.63	35100000
QQQTLLPFNQ	24.1	1215.62	10	0.7	608.82	48.6	10300000
ASPVAQLQQQQLV	24.07	1408.77	13	0.8	705.391	45.47	39600000
QQQQLLHGN	24.07	1064.54	9	3.4	533.277	38.61	260000000
SAVLIQQPL	24.07	967.57	9	0.9	484.793	48.04	13900000
FGNVVM(+15.99)DIPHA	24.07	1214.58	11	0.1	608.295	36.64	0
LVEPQHQYNAIY	24.05	1473.73	12	0.9	737.87	30.04	3890000
INIPEFGDK	24.05	1031.53	9	1.3	516.772	35.73	6920000
FKLPDPL	24.03	828.475	7	-1	415.244	41.4	197000000
IINADNVQE	24.02	1014.5	9	1.1	508.257	21.64	12800000
YLPHLT	24.01	742.401	6	-0.4	372.208	21.92	152000000
FVVVGDNDGH	23.95	1057.48	10	-2.1	529.748	21.4	3530000
FADLIEK	23.93	834.449	7	-1.6	418.231	23.3	2020000
APIRPDIV	23.91	879.518	8	-0.9	440.766	22.03	3070000
PSLAIFNAM	23.91	962.49	9	0.1	482.252	42.74	15100000
APAKANPLP	23.91	877.502	9	-1.6	439.758	22.01	2070000
QSLSHLTVQSITAQQ	23.9	1639.85	15	0.3	820.934	35.74	61200000
AQLQQQQLVSNVFN	23.82	1615.83	14	-0.8	808.923	50.68	34400000
QQQSLSHLTVQ	23.81	1267.65	11	0	634.833	20.66	49100000
IERDPAAAPV	23.81	1037.55	10	1.3	519.783	17.63	4530000
M(+15.99)MPSM(+15.99)MPF	23.8	1002.37	8	-0.8	502.191	41.48	25000000
FYKEEEKNDPEFA	23.8	1644.73	13	-0.2	823.372	21.08	10000000
AYWQQQ	23.75	822.366	6	-0.7	412.19	22.71	11900000
EMQAKPDLIIG	23.74	1213.64	11	1.5	607.827	33.68	56400000
SDKPFFPGLVE	23.73	1234.62	11	-0.8	618.318	49.47	138000000
KFDGFRFDGVTSM	23.72	1505.7	13	0	502.906	47.37	23500000
SAMNPAAFWQQQQ	23.7	1505.67	13	0.3	753.844	53.75	144000000
NQLALANPA	23.69	910.487	9	0.4	456.251	28.98	369000000
NQLAIANPA	23.69	910.487	9	0.4	456.251	28.98	369000000
VPTFLVPA	23.69	842.49	8	-1.2	422.252	50.69	3520000
LENPSFKPT	23.68	1031.53	9	-0.1	516.771	20	75300000
HTVMPW	23.68	769.358	6	-0.7	385.686	23.37	4500000
LASGILAPS	23.67	827.475	9	0.6	414.745	30.99	23200000
AYLQQQQLLPNVFNQLALASPV	23.66	2454.33	22	2.7	1228.17	56.32	1550000
QAGLPLVQQ	23.65	952.534	9	-0.8	477.274	23.94	0
ATIPQYLSP	23.64	988.523	9	0	495.269	43.07	165000000
ALGYEN(+.98)PIVQSNRLQQA	23.61	1900.96	17	8.8	951.498	39.48	8950
ANAFSQQQQLLPFNQ	23.61	1732.85	15	-4	867.43	54.53	20700000
LLIGYQAQ	23.61	904.502	8	-0.8	453.258	48.35	32000000
YADWGEPLPH	23.6	1183.53	10	0.1	592.772	38.98	14500000
LTVTDDDVIEK	23.57	1246.63	11	-0.4	624.322	27.82	4070000
YEEAMPPLEEGPY	23.54	1523.65	13	-0.3	762.832	52.4	96100000
DGYWEDIGT	23.54	1054.42	9	1.5	528.22	54.85	6340000
TGGLGDVAGALPK	23.53	1154.63	13	-0.9	578.322	34.3	244000000
LREQFPGANDFGSEVIPGAT	23.52	2104.02	20	0.9	1053.02	52.29	10800000
LQQQSALWQHQSLASPA	23.52	1891.95	17	-1.5	946.983	35.92	100000000
GEIGHLFCPQ	23.51	1099.51	10	2.4	550.765	21.07	32100000
SDKPFFPG	23.46	893.428	8	-0.6	447.721	24.14	33000000
LPQQSALLQQQSL	23.44	1452.79	13	2.8	727.406	45.91	36500000
SQQQQ(+.98)LLP	23.44	941.482	8	-0.4	471.748	29.09	8740000
AFWQQQQLVNQL	23.44	1501.77	12	3.1	751.893	56.14	2000000
RHGGALGP	23.42	763.409	8	2.6	382.713	38.7	0
YSPGPRDEAALQFIQSA	23.41	1848.9	17	-0.7	925.457	51.24	5480000
VNGMDVSEWDPS	23.41	1334.54	12	0.5	668.28	51.64	116000000
LALTSPF	23.41	747.417	7	-0.9	374.715	51.47	0
HIGLRFV	23.4	840.497	7	3.7	421.257	57.27	120000000
RQAVDISPL	23.39	997.556	9	-0.4	499.785	27.73	22500000
VIIPAGVPR	23.39	920.581	9	0	461.298	26.13	6650000
FLIGDIDASQGA	23.39	1205.59	12	-0.8	603.803	54	16900000
EKLIKISH	23.38	966.586	8	2.6	484.302	44.88	0
AANVETFPGVNT	23.37	1218.59	12	0.6	610.302	38.17	121000000
LQQPIVG	23.37	753.438	7	-0.4	377.726	22.06	202000000
SAESPAPR	23.37	813.398	8	4	407.708	21.48	4920000
VALANPIT	23.35	797.465	8	-0.7	399.739	31.7	6300000
AHWQQQ(+.98)Q(+.98)LV	23.35	1138.54	9	-7.6	570.273	22.67	241000
MDVSEWDPSKDK	23.33	1435.63	12	-1.9	479.549	28.91	7300000
QAANGIPTSPLPR	23.32	1320.71	13	-6.4	661.361	25.7	0
AQADIGGVPNPIPPPTQPPVPE	23.28	2190.13	22	-0.1	1096.07	53.07	16600000
PSLPTPCASPL	23.26	1081.55	11	8.4	541.786	31.14	0
IVGPGNELGKPI	23.22	1192.68	12	0	597.348	28.52	2890000
QQQQLLPFNQLA	23.21	1426.76	12	0.2	714.386	55.1	34000000
WGWEEGEGEWRPE	23.18	1645.68	13	4	823.85	52.15	14800000
TLVPGLKD	23.18	841.491	8	-0.7	421.752	24.16	5220000
LQQQSALLQQQYLA	23.17	1630.87	14	2	816.443	48.49	45300000
YDLLPK	23.17	747.417	6	0	374.716	24.73	0
ELVVLTPR	23.16	925.56	8	-1.4	463.786	26.2	1340000
QQQLLP	23.16	725.407	6	-0.5	363.711	26.39	0
IQAALIPAAA	23.14	937.56	10	0.3	469.787	54.72	10600000
KYEPTIGV	23.1	905.486	8	0.3	453.75	22.48	5170000
LFMALQP	23.09	818.436	7	0.2	410.225	54.63	9070000
LKVDVDE	23.03	816.423	7	0.2	409.219	18.25	17400000
NFMGNEFGHPE	23.03	1277.51	11	-0.5	639.764	31.56	7280000000
VINDKFGIVEG	23.03	1189.63	11	0	595.824	32.46	24600000
SM(+15.99)M(+15.99)LQQPW	22.99	1051.45	8	0.3	526.731	35.66	4830000
TALGYGNPIVQ	22.96	1131.59	11	0.2	566.804	40.84	17200000
FLHQPIVGSA	22.95	1067.58	10	-0.6	534.795	26.94	9780000000
GVDRVFIDHPSFLE	22.92	1629.82	14	-2	815.913	47.92	39700000
QQ(+.98)SLSHLTVQSITAQQQR	22.91	2053.06	18	9.4	685.365	28.36	29300
YLPPTQLD	22.91	945.481	8	1.7	473.748	34.48	41800000
SGIVVILK	22.89	827.548	8	0.3	414.781	26.45	0
NQLALASPLAHLQQQALVA	22.89	1985.11	19	-0.3	993.56	54.3	40900000
ALGYGNPIV	22.88	902.486	9	0	452.25	41.49	22800000
ALVVINPGNPTGQV	22.88	1377.76	14	-0.5	689.888	48.04	39400000
AFLQQ(+.98)PIVGS	22.87	1059.56	10	1.5	530.788	45.24	0
QGAIFPLLG	22.87	914.523	9	-0.7	458.268	42.3	172000000
FRAPVEPY	22.84	977.497	8	0.2	489.756	26.28	12000000
ALANAFSQQQQLLPFNQ	22.84	1916.97	17	2	959.496	56.19	0
SLFPGHPV	22.82	852.449	8	0.9	427.232	25.93	11800000
ALTSPFAQLQQQQLVS	22.81	1757.93	16	-0.8	879.972	56	8280000
IVIGMPH	22.79	765.421	7	0.2	383.718	26.25	2690000
SWNRPALD	22.79	957.467	8	-0.7	479.74	22.67	2780000
FFEKPV	22.79	765.406	6	-1	383.71	21.3	8940000
QTQQIQQPNI	22.79	1196.62	10	-0.2	599.315	27.72	39000000
PQYLPHLTALG	22.68	1208.66	11	1.2	605.336	38.03	7250000
DGVHWDPPASE	22.68	1208.51	11	-0.6	605.262	32	53600000
PLGANYRL	22.67	902.497	8	-0.8	452.256	24.13	1960000
KFLTPK	22.66	732.453	6	0.8	367.234	10.83	87300
FSRDPVPF	22.66	963.481	8	0.3	482.748	31.02	0
ITGGGFTDNIPR	22.66	1246.63	12	0.9	624.323	29.75	3320000
IAEVNGTEIKP	22.66	1169.63	11	-0.2	585.822	22.73	31400000
VVVADSIHDV	22.63	1052.55	10	0.2	527.283	25.96	13800000
MPSMMPF	22.63	839.338	7	-1	420.676	55.44	1960000
DVISIPK	22.62	770.454	7	-0.3	386.234	25.95	9440000
RFDEGLPPI	22.61	1042.54	9	0	522.28	40.4	18800000
ATIPQYL	22.61	804.438	7	-0.5	403.226	41.01	4450000
ILDNVDLPA	22.61	968.518	9	-0.4	485.266	46.83	43200000
VLLSRPLP	22.61	893.57	8	-1.2	447.792	26.17	5550000
ADWGEPLPH	22.58	1020.47	9	-0.2	511.24	32.19	9970000
SLLPLPSQQ	22.57	981.549	9	0.5	491.782	47.87	18300000
YSVQAPGAIP	22.54	1001.52	10	-0.8	501.766	37.41	5890000
IAGAGITH	22.54	738.402	8	-0.1	370.208	23.28	0
GGLVDTVIEG	22.5	958.497	10	0.2	480.256	48	19600000
MLQQPWTSPLQ	22.49	1327.66	11	0.3	664.837	52.7	28800000
WQHQQLLPFNQ	22.48	1437.72	11	-0.2	719.865	42.64	200000000
VDINSEALKPPSWDE	22.48	1698.81	15	1	850.413	49.24	71200000
QSLSHLTVQSITAQQQ	22.48	1767.91	16	-0.9	884.962	35.63	4880000
LILDDDPLSAPPQ	22.47	1392.71	13	7.8	697.37	44.11	25900000
LFLLPQ	22.46	729.442	6	-0.2	365.728	50.57	175000000
LLDPPLHEFLPE	22.45	1418.74	12	0.8	710.38	55.02	1600000
A(+42.01)ALLARPAGA	22.44	951.55	10	-1.6	476.782	50.05	0
AFLQQPIV	22.43	914.523	8	8.9	458.273	48.08	29200000
YEKPVEG	22.43	820.397	7	0.2	411.206	11.19	289000
ITTPFHPA	22.42	882.46	8	-2	442.236	21.9	7060000
LIDIPM	22.41	700.383	6	-0.1	351.199	50.93	8000000
QQPPYGGVP	22.41	941.461	9	0.1	471.738	25.47	90900000
MALQDLVTKPA	22.38	1185.64	11	0	593.829	40.33	3650000
IDIDIK	22.37	715.412	6	-0.3	358.713	24.2	2040000
FIVPSHTDA	22.37	985.487	9	-0.6	493.75	21.75	50500000
ISFRPFPS	22.37	949.502	8	-0.5	475.758	36.61	7820000
RLQQALA	22.36	798.471	7	1	400.243	13.08	202000
LALTSPL	22.36	713.432	7	-0.1	357.723	43.66	3040000
LALTSPI	22.36	713.432	7	-0.1	357.723	43.66	3040000
NLIDSPGHVD	22.36	1065.51	10	0.4	533.762	23.03	13900000
ADEPPKVPIPT	22.35	1162.62	11	0.1	582.319	28.51	48300000
IIYADYYGHVER	22.33	1497.73	12	0.4	500.249	28.32	0
LALANPAAYLQQQTLLPFNQ	22.32	2213.18	20	3.5	1107.6	56.29	7260000
TIHKHKVP	22.3	958.571	8	-0.5	480.293	31.18	0
LQQQTLLP	22.28	939.539	8	-0.4	470.777	35.04	488000000
ALGYENPIVQ	22.26	1102.57	10	0.6	552.29	41.85	4670000
AQLQQQQLVSNVFNQ	22.26	1743.89	15	-1.8	872.951	51.69	46100000
TVAREVEL	22.25	915.503	8	-0.4	458.758	33.46	0
LLQNKPVPI	22.25	1020.63	9	0.2	511.324	23.1	9610000
YWQHQ	22.25	760.329	5	1.1	381.172	12.34	198000
RGVDRVFIDHPS	22.24	1396.72	12	-0.6	466.581	18.56	8050000
EQFPGANDFGSEVIPG	22.24	1662.75	16	0.1	832.384	55.47	92600000
YEHLVVTPA	22.22	1027.53	9	-0.5	514.774	22.94	26100000
ASPVAQLQQQQLVSNV	22.21	1708.91	16	-1.2	855.462	49.26	236000000
PVQQLLQLP	22.18	1034.61	9	-0.6	518.313	55.41	70500000
QQQLQILP	22.17	966.55	8	0	484.282	34.24	338000000
AVANAYWQQQQLRPF	22.17	1818.92	15	-1	910.465	49.21	21200000
LQQPIVGSAL	22.15	1024.59	10	-0.5	513.303	37.84	17500000
IGVEVHPL	22.14	862.491	8	-0.5	432.253	27.06	3380000
SLPALNDPR	22.12	981.524	9	0.4	491.77	22.4	15200000
ALLQQQSLSHLTVQSITAQQ(+.98)Q	22.12	2322.22	21	8.8	775.087	50.34	14400000
LNPDLQQQLPKP	22.11	1389.76	12	0.2	695.888	33.85	20000000
NLIDSPGHV	22.11	950.482	9	0.4	476.248	22.99	10400000
IRPVLTVN	22.07	910.56	8	-0.1	456.287	21.93	1480000
EWGKEEEEE	22.06	1163.46	9	1.1	582.739	16.21	7400000
LQQQQLVSNVFNQV	22.02	1643.86	14	0.1	822.939	54.89	77900000
KVVPVEVP	22.02	865.527	8	0.5	433.771	33.88	0
SLSHLTVQSITAQQQRILSPLNQ(+.98)LA	22.02	2746.5	25	7.1	916.513	54.7	5420000
RLTGITGI	22.01	829.502	8	-1	415.758	24.2	2840000
RLTGLTGL	22.01	829.502	8	-1	415.758	24.2	2840000
LQQQQAQLLQ(+.98)Q	22.01	1325.69	11	6	663.858	35.7	0
AMNPCM(+15.99)Q(+.98)YC	22.01	1076.34	9	-0.5	539.179	20.89	24800000
SKTGGLGDVLGGLPPA	22	1437.78	16	1.7	719.9	48.07	64500000
IIMNHPGQIGNGYA	21.99	1483.72	14	0.6	742.87	28.17	7790000
LQQQSLSHLTVQSIT	21.99	1681.9	15	-0.1	841.957	38.56	10400000
DGWYPPGHGDV	21.99	1198.5	11	0.8	600.26	34.21	0
LVIIDVQPK	21.95	1023.63	9	-0.3	512.823	31.5	14500000
IYGGTHGQGVGGGGRPVGE	21.93	1753.85	19	2	585.625	16.82	1950000
FRQQPIIG	21.92	957.54	8	-0.7	479.777	20.24	12700000
LQQQTLLPFNQLA	21.91	1512.83	13	6.2	757.427	56.21	1340000
EDRPAGGQGGPRPGGPGPA	21.89	1728.83	19	1.1	577.284	13.5	628000
YLFPQIHLPQ	21.87	1254.68	10	0	628.345	53.96	21900000
VASLALPNV	21.86	882.518	9	-0.1	442.266	41.73	0
PPLHEFLPEGN	21.86	1248.61	11	0.7	625.315	35.68	4240000
NDWHTGPL	21.85	938.425	8	-0.7	470.219	25.65	64800000
IKFDVGNV	21.85	890.486	8	-0.5	446.25	32.17	10200000
QPPHLTSIPQNQQSQ	21.83	1701.84	15	-0.2	851.929	32.12	12400000
AKIPPLIIP	21.83	960.637	9	-0.7	481.325	42.58	4630000
ATMLPNVFNQLA	21.83	1317.67	12	2	659.846	56.27	664000
LPPLQEREQSR	21.8	1351.72	11	7.1	676.872	23.69	3250000
VSSVFNQVALANPY	21.79	1507.77	14	0.4	754.891	55.37	15800000
TLVPGLKDEV	21.78	1069.6	10	0	535.808	35.18	62100000
LQQPWTSPLQ	21.78	1196.62	10	0.6	599.317	48.42	27800000
IREGSVIVIPA	21.77	1152.69	11	0.8	577.351	32.56	28300000
ASPLALAYDPS	21.77	1103.55	11	1	552.783	34.62	0
LQQQYLAHLTLQ(+.98)SIMAQQHQVLSPFSR	21.75	3165.64	27	5.6	1056.23	55.94	0
SLAHVTVQSITAQQ(+.98)QQYLPA	21.75	2183.12	20	7	1092.58	49.9	3550000
YRPSMPV	21.74	848.421	7	-1	425.218	21.46	15300000
FRVLERFTHE	21.74	1332.69	10	-0.8	445.238	22.99	5600000
QQQTLLP	21.73	826.455	7	-0.6	414.234	27.54	187000000
NPAAFWQQQQ(+.98)LVNQ	21.73	1671.8	14	9.5	836.915	52.62	1210000
TMVYQMVQQQ(+.98)QPPYGGGVQGQQVGVV	21.72	2806.34	26	6.1	1404.19	54.87	2090000
DWHTGPL	21.72	824.382	7	-0.6	413.198	29.39	12200000
VIPGPGDKPM(+15.99)IV	21.72	1237.67	12	0.5	619.845	28.53	2440000
LRVNPVAAMNPA	21.7	1251.68	12	1	626.846	29.71	32100000
LMEEDVQIV	21.67	1074.53	9	-0.3	538.27	48.26	19700000
WQQQQQLP	21.67	1054.52	8	-0.1	528.267	27.76	8760000
FLHGAPLPAA	21.66	992.544	10	0.2	497.279	28.08	23600000
GLSGPLLSFVG	21.65	1045.58	11	-2.5	523.796	43.77	2760000
SLGAALAALAPA	21.64	1024.59	12	1.2	513.304	49.45	47900000
VLMDVVHS	21.64	898.458	8	-0.2	450.236	25.93	8220000
MNPAAFWQQQQLLR	21.62	1729.87	14	0.3	865.944	53.82	6950000
[truncated: 620 more rows]
