# Supplementary material for: Protective effects of bioactive peptides in foxtail millet protein hydrolysates against experimental colitis in mice
Source: Royal Society of Chemistry journal article supplement (doi:10.1039/d1fo02482e), 2021-12-25
Supplement: d1fo02482e3.xlsx [file d1fo02482e3.xlsx]

## Sheet: Sheet1
Protein Group	Protein ID	Accession	-10lgP	Coverage (%)	#Peptides	#Unique	#Spec a1	PTM	Avg. Mass	Description
1	1	tr|A0A368S9B5|A0A368S9B5_SETIT	338.5	81	237	34	390	Oxidation (M); Deamidation (NQ)	21744	Uncharacterized protein OS=Setaria italica OX=4555 GN=SETIT_8G190300v2 PE=3 SV=1
2	2	tr|A0A368S9L7|A0A368S9L7_SETIT	328.76	80	206	6	336	Oxidation (M); Deamidation (NQ)	21755	Uncharacterized protein OS=Setaria italica OX=4555 GN=SETIT_8G190500v2 PE=3 SV=1
3	4	tr|K3ZJP2|K3ZJP2_SETIT	293.76	78	150	88	212	Oxidation (M); Deamidation (NQ)	26427	Uncharacterized protein OS=Setaria italica OX=4555 GN=101752799 PE=3 SV=1
9	6	tr|K4AEX1|K4AEX1_SETIT	246.88	73	108	30	135	Oxidation (M); Deamidation (NQ)	23670	Uncharacterized protein OS=Setaria italica OX=4555 GN=101777702 PE=3 SV=1
4	13	tr|K4AFF0|K4AFF0_SETIT	239.04	79	142	23	196	Oxidation (M); Deamidation (NQ)	21092	Uncharacterized protein OS=Setaria italica OX=4555 PE=3 SV=1
4	14	tr|A0A368SQZ4|A0A368SQZ4_SETIT	239.04	74	142	23	196	Oxidation (M); Deamidation (NQ)	22300	Uncharacterized protein OS=Setaria italica OX=4555 GN=SETIT_9G406500v2 PE=3 SV=1
5	17	tr|A0A368SQY7|A0A368SQY7_SETIT	237.1	73	135	17	191	Oxidation (M); Deamidation (NQ)	22799	Uncharacterized protein OS=Setaria italica OX=4555 GN=SETIT_9G406400v2 PE=3 SV=1
6	11	tr|A0A368SB20|A0A368SB20_SETIT	235.88	71	112	68	152	Oxidation (M); Deamidation (NQ)	22602	Uncharacterized protein OS=Setaria italica OX=4555 GN=SETIT_8G190200v2 PE=3 SV=1
14	5	tr|K3Z9Q1|K3Z9Q1_SETIT	233.76	67	73	43	88	Deamidation (NQ)	22438	Uncharacterized protein OS=Setaria italica OX=4555 GN=101757543 PE=3 SV=1
10	8	tr|K3XW03|K3XW03_SETIT	231.22	41	97	96	134	Oxidation (M); Deamidation (NQ)	65234	Starch synthase chloroplastic/amyloplastic OS=Setaria italica OX=4555 PE=3 SV=1
10	9	tr|K3XVZ5|K3XVZ5_SETIT	231.22	41	97	96	134	Oxidation (M); Deamidation (NQ)	66115	Starch synthase chloroplastic/amyloplastic OS=Setaria italica OX=4555 GN=waxy PE=3 SV=1
12	22	tr|K4AI55|K4AI55_SETIT	227.08	51	74	0	100	Oxidation (M); Deamidation (NQ)	27390	Uncharacterized protein OS=Setaria italica OX=4555 GN=SETIT_9G301500v2 PE=3 SV=1
7	18	tr|A0A368SR49|A0A368SR49_SETIT	226.96	70	106	0	150	Oxidation (M); Deamidation (NQ)	22725	Uncharacterized protein OS=Setaria italica OX=4555 GN=SETIT_9G406300v2 PE=3 SV=1
8	19	tr|K4AKF5|K4AKF5_SETIT	226.15	71	104	1	149	Oxidation (M); Deamidation (NQ)	21903	Uncharacterized protein OS=Setaria italica OX=4555 PE=3 SV=1
17	37	tr|K3XLT8|K3XLT8_SETIT	220.43	35	30	20	66	Deamidation (NQ)	22907	Germin-like protein OS=Setaria italica OX=4555 GN=101760836 PE=3 SV=1
11	24	tr|A0A368RS51|A0A368RS51_SETIT	213.91	60	74	26	107	Deamidation (NQ)	18531	Uncharacterized protein OS=Setaria italica OX=4555 GN=SETIT_7G040300v2 PE=3 SV=1
15	70	tr|K4A875|K4A875_SETIT	211.16	10	22	22	74		61305	Uncharacterized protein OS=Setaria italica OX=4555 GN=SETIT_9G148000v2 PE=4 SV=1
16	51	tr|K3ZK91|K3ZK91_SETIT	206.88	59	36	24	67	Oxidation (M); Deamidation (NQ)	15254	Uncharacterized protein OS=Setaria italica OX=4555 GN=101785873 PE=4 SV=1
18	15	tr|K3YQ08|K3YQ08_SETIT	203.96	33	56	33	66	Oxidation (M); Deamidation (NQ)	90486	1 4-alpha-glucan branching enzyme OS=Setaria italica OX=4555 GN=101774505 PE=3 SV=1
18	16	tr|A0A368PLU9|A0A368PLU9_SETIT	203.96	31	56	33	66	Oxidation (M); Deamidation (NQ)	94940	1 4-alpha-glucan branching enzyme OS=Setaria italica OX=4555 GN=SETIT_1G179000v2 PE=3 SV=1
19	12	tr|K3YSK4|K3YSK4_SETIT	201.2	35	37	36	60	Oxidation (M)	45971	Uncharacterized protein OS=Setaria italica OX=4555 GN=101762476 PE=3 SV=1
13	25	tr|K3XZW2|K3XZW2_SETIT	194.41	63	39	27	97	Oxidation (M); Deamidation (NQ)	15738	Uncharacterized protein OS=Setaria italica OX=4555 GN=101758374 PE=4 SV=1
36	109	tr|A0A368SG44|A0A368SG44_SETIT	188.81	34	15	13	21		17855	Oleosin OS=Setaria italica OX=4555 GN=SETIT_9G128500v2 PE=3 SV=1
20	41	tr|K3ZLT4|K3ZLT4_SETIT	186.68	53	43	2	59	Deamidation (NQ)	22403	Uncharacterized protein OS=Setaria italica OX=4555 PE=3 SV=1
22	42	tr|A0A368S9B8|A0A368S9B8_SETIT	184.52	44	41	0	56	Deamidation (NQ)	24845	Uncharacterized protein OS=Setaria italica OX=4555 GN=SETIT_8G190100v2 PE=3 SV=1
26	35	tr|K3XGL9|K3XGL9_SETIT	182.67	22	27	24	37		57456	Glucose-1-phosphate adenylyltransferase OS=Setaria italica OX=4555 GN=101768017 PE=3 SV=1
26	36	tr|A0A368R805|A0A368R805_SETIT	182.67	20	27	24	37		61979	Glucose-1-phosphate adenylyltransferase OS=Setaria italica OX=4555 GN=SETIT_5G237300v2 PE=3 SV=1
23	21	tr|A0A368QZD5|A0A368QZD5_SETIT	181.51	20	31	24	47	Oxidation (M)	105338	1 4-alpha-glucan branching enzyme OS=Setaria italica OX=4555 GN=SETIT_4G286200v2 PE=3 SV=1
21	48	tr|A0A368Q182|A0A368Q182_SETIT	177.41	60	41	41	57	Oxidation (M); Deamidation (NQ); Acetylation (Protein N-term)	15358	AAI domain-containing protein OS=Setaria italica OX=4555 GN=SETIT_2G215200v2 PE=4 SV=1
28	26	tr|A0A368SRA4|A0A368SRA4_SETIT	174.1	26	25	25	33		57239	Uncharacterized protein OS=Setaria italica OX=4555 GN=SETIT_9G412800v2 PE=4 SV=1
28	27	tr|K4A8E5|K4A8E5_SETIT	174.1	25	25	25	33		57853	Uncharacterized protein OS=Setaria italica OX=4555 PE=4 SV=1
24	28	tr|K3Z3X1|K3Z3X1_SETIT	172.81	21	35	30	45	Oxidation (M); Deamidation (NQ)	88725	Pyruvate phosphate dikinase OS=Setaria italica OX=4555 PE=3 SV=1
24	29	tr|K3Z3Q6|K3Z3Q6_SETIT	172.81	19	35	30	45	Oxidation (M); Deamidation (NQ)	95760	Pyruvate phosphate dikinase OS=Setaria italica OX=4555 GN=SETIT_3G247900v2 PE=3 SV=1
24	30	tr|A0A368QIL8|A0A368QIL8_SETIT	172.81	18	35	30	45	Oxidation (M); Deamidation (NQ)	102425	Pyruvate phosphate dikinase OS=Setaria italica OX=4555 GN=SETIT_3G247900v2 PE=3 SV=1
30	64	tr|K3YHE6|K3YHE6_SETIT	158.68	29	24	23	27		52593	Glucose-1-phosphate adenylyltransferase OS=Setaria italica OX=4555 GN=101759783 PE=3 SV=1
30	65	tr|K3YH56|K3YH56_SETIT	158.68	27	24	23	27		56286	Glucose-1-phosphate adenylyltransferase OS=Setaria italica OX=4555 GN=101759783 PE=3 SV=1
32	39	tr|K3XVC3|K3XVC3_SETIT	156.52	19	21	14	24		91721	Sucrose synthase OS=Setaria italica OX=4555 GN=101759310 PE=3 SV=1
32	40	tr|K3XVA2|K3XVA2_SETIT	156.52	18	21	14	24		95005	Sucrose synthase OS=Setaria italica OX=4555 GN=101759310 PE=3 SV=1
37	107	tr|K3XLU3|K3XLU3_SETIT	156.1	16	12	2	20	Deamidation (NQ)	22875	Germin-like protein OS=Setaria italica OX=4555 GN=SETIT_5G035200v2 PE=3 SV=1
27	58	tr|K3Z668|K3Z668_SETIT	154.38	19	23	3	34	Oxidation (M); Deamidation (NQ)	49266	Elongation factor 1-alpha OS=Setaria italica OX=4555 GN=101783081 PE=3 SV=1
29	56	tr|K3Z675|K3Z675_SETIT	152.52	19	22	2	31	Oxidation (M); Deamidation (NQ)	49252	Elongation factor 1-alpha OS=Setaria italica OX=4555 GN=101786823 PE=3 SV=1
29	57	tr|K4A9X9|K4A9X9_SETIT	152.52	19	22	2	31	Oxidation (M); Deamidation (NQ)	49304	Elongation factor 1-alpha OS=Setaria italica OX=4555 GN=101765405 PE=3 SV=1
25	110	tr|K3ZA42|K3ZA42_SETIT	150.74	23	15	15	40		19732	AAI domain-containing protein OS=Setaria italica OX=4555 GN=101758349 PE=4 SV=1
34	52	tr|K3Z3S9|K3Z3S9_SETIT	150.07	12	16	16	22	Deamidation (NQ)	93497	AIG1-type G domain-containing protein OS=Setaria italica OX=4555 GN=SETIT_3G036200v2 PE=3 SV=1
33	47	tr|K4A5S7|K4A5S7_SETIT	150.02	12	20	20	22	Deamidation (NQ)	91459	Omp85 domain-containing protein OS=Setaria italica OX=4555 GN=101769342 PE=4 SV=1
31	43	tr|K3Y591|K3Y591_SETIT	144.47	11	23	1	26	Oxidation (M); Deamidation (NQ)	89620	Aamy domain-containing protein OS=Setaria italica OX=4555 PE=4 SV=1
31	44	tr|A0A368RTU1|A0A368RTU1_SETIT	144.47	11	23	1	26	Oxidation (M); Deamidation (NQ)	94701	1 4-alpha-glucan branching enzyme OS=Setaria italica OX=4555 GN=SETIT_7G088700v2 PE=3 SV=1
31	45	tr|K3Y524|K3Y524_SETIT	144.47	10	23	1	26	Oxidation (M); Deamidation (NQ)	101396	1 4-alpha-glucan branching enzyme OS=Setaria italica OX=4555 PE=3 SV=1
38	83	tr|K3XEI1|K3XEI1_SETIT	139.26	10	15	15	19	Oxidation (M); Deamidation (NQ)	93910	Tr-type G domain-containing protein OS=Setaria italica OX=4555 GN=101767476 PE=3 SV=1
35	81	tr|K4A9S8|K4A9S8_SETIT	134.01	13	16	16	22	Oxidation (M)	50323	Uncharacterized protein OS=Setaria italica OX=4555 GN=101785762 PE=4 SV=1
50	46	tr|K3YA06|K3YA06_SETIT	133.37	35	9	9	12		22736	Uncharacterized protein OS=Setaria italica OX=4555 GN=101777927 PE=3 SV=1
42	54	tr|K4A565|K4A565_SETIT	130.76	9	14	14	16		120266	Alpha-1 4 glucan phosphorylase OS=Setaria italica OX=4555 PE=3 SV=1
42	55	tr|A0A368SEE1|A0A368SEE1_SETIT	130.76	10	14	14	16		109767	Alpha-1 4 glucan phosphorylase OS=Setaria italica OX=4555 GN=SETIT_9G085600v2 PE=3 SV=1
43	59	tr|K3Z4R0|K3Z4R0_SETIT	129.04	9	13	7	16		65151	Acetohydroxy-acid reductoisomerase OS=Setaria italica OX=4555 PE=3 SV=1
43	60	tr|A0A368QGN6|A0A368QGN6_SETIT	129.04	9	13	7	16		63049	Ketol-acid reductoisomerase OS=Setaria italica OX=4555 GN=SETIT_3G138300v2 PE=3 SV=1
40	50	tr|K3XV70|K3XV70_SETIT	127.05	10	13	13	18	Oxidation (M)	96889	Uncharacterized protein OS=Setaria italica OX=4555 GN=101761758 PE=3 SV=1
41	49	tr|K3ZWR9|K3ZWR9_SETIT	126.66	37	14	14	16		24294	Peroxiredoxin OS=Setaria italica OX=4555 GN=101757638 PE=3 SV=1
51	87	tr|K4A5X5|K4A5X5_SETIT	125.09	9	10	3	12		92946	Sucrose synthase OS=Setaria italica OX=4555 GN=101783222 PE=3 SV=1
67	101	tr|K3YPU7|K3YPU7_SETIT	122.46	5	8	8	8		95965	AlaDh_PNT_C domain-containing protein OS=Setaria italica OX=4555 GN=101756273 PE=4 SV=1
67	102	tr|K3YPI4|K3YPI4_SETIT	122.46	4	8	8	8		115374	Lysine ketoglutarate reductase OS=Setaria italica OX=4555 GN=101756273 PE=4 SV=1
67	103	tr|K3YPI0|K3YPI0_SETIT	122.46	4	8	8	8		116350	Lysine ketoglutarate reductase OS=Setaria italica OX=4555 GN=101756273 PE=4 SV=1
67	104	tr|K3YPH9|K3YPH9_SETIT	122.46	4	8	8	8		116297	Lysine ketoglutarate reductase OS=Setaria italica OX=4555 GN=101756273 PE=4 SV=1
63	265	tr|K3ZK21|K3ZK21_SETIT	122.25	27	6	6	9	Oxidation (M)	16914	Uncharacterized protein OS=Setaria italica OX=4555 GN=101760090 PE=3 SV=1
45	63	tr|K3XVE3|K3XVE3_SETIT	122.13	13	13	13	14		84056	Starch synthase chloroplastic/amyloplastic OS=Setaria italica OX=4555 GN=101763655 PE=3 SV=1
39	67	tr|K3ZC96|K3ZC96_SETIT	118.17	48	16	2	18	Deamidation (NQ)	14357	Uncharacterized protein OS=Setaria italica OX=4555 GN=SETIT_3G267800v2 PE=3 SV=1
78	74	tr|K3XX87|K3XX87_SETIT	117.19	13	7	7	7		47038	Uncharacterized protein OS=Setaria italica OX=4555 GN=101768392 PE=4 SV=1
52	105	tr|A0A368Q5Y0|A0A368Q5Y0_SETIT	116.39	23	11	8	12	Oxidation (M)	16831	Nucleoside diphosphate kinase OS=Setaria italica OX=4555 GN=SETIT_2G319600v2 PE=3 SV=1
47	71	tr|K3ZI56|K3ZI56_SETIT	114.58	16	11	11	13		55556	Protein disulfide-isomerase OS=Setaria italica OX=4555 GN=101780630 PE=3 SV=1
47	72	tr|K3ZI40|K3ZI40_SETIT	114.58	16	11	11	13		56557	Protein disulfide-isomerase OS=Setaria italica OX=4555 GN=101780630 PE=3 SV=1
46	62	tr|A0A368RRA7|A0A368RRA7_SETIT	112.9	8	12	12	13		103958	Uncharacterized protein OS=Setaria italica OX=4555 GN=SETIT_7G019400v2 PE=4 SV=1
55	61	tr|K3XJE1|K3XJE1_SETIT	112.85	21	8	8	10		37719	Peroxidase OS=Setaria italica OX=4555 GN=101778284 PE=3 SV=1
44	73	tr|K3YG24|K3YG24_SETIT	112.36	9	12	12	15		106689	Aconitate hydratase OS=Setaria italica OX=4555 GN=SETIT_6G036900v2 PE=3 SV=1
54	75	tr|A0A368SP44|A0A368SP44_SETIT	111.63	8	10	5	10		79708	Pyruvate phosphate dikinase OS=Setaria italica OX=4555 GN=SETIT_9G354600v2 PE=3 SV=1
54	76	tr|K4A5K9|K4A5K9_SETIT	111.63	6	10	5	10		97184	Pyruvate phosphate dikinase OS=Setaria italica OX=4555 GN=SETIT_9G354600v2 PE=3 SV=1
70	147	tr|K4AIL8|K4AIL8_SETIT	111.44	21	7	4	8	Oxidation (M)	16625	Nucleoside diphosphate kinase OS=Setaria italica OX=4555 GN=101766493 PE=3 SV=1
93	134	tr|K3YQN8|K3YQN8_SETIT	111.29	6	5	5	6		73332	Uncharacterized protein OS=Setaria italica OX=4555 GN=101775309 PE=3 SV=1
93	136	tr|K3YRC8|K3YRC8_SETIT	111.29	7	5	5	6		60721	Uncharacterized protein OS=Setaria italica OX=4555 GN=101775309 PE=3 SV=1
69	160	tr|K4A5Y9|K4A5Y9_SETIT	110.42	4	6	1	8		92339	Sucrose synthase OS=Setaria italica OX=4555 GN=101784175 PE=3 SV=1
57	68	tr|A0A368REM2|A0A368REM2_SETIT	109.82	16	9	5	10		38700	Fructose-bisphosphate aldolase OS=Setaria italica OX=4555 GN=SETIT_5G419900v2 PE=3 SV=1
57	69	tr|K3XT03|K3XT03_SETIT	109.82	11	9	5	10		56789	Fructose-bisphosphate aldolase OS=Setaria italica OX=4555 PE=3 SV=1
73	120	tr|K3ZGW5|K3ZGW5_SETIT	108.9	2	6	6	7		193629	Clathrin heavy chain OS=Setaria italica OX=4555 GN=101782089 PE=3 SV=1
73	121	tr|K3Y4M8|K3Y4M8_SETIT	108.9	2	6	6	7		193647	Clathrin heavy chain OS=Setaria italica OX=4555 GN=101777651 PE=3 SV=1
64	90	tr|K3Y9M3|K3Y9M3_SETIT	105.68	20	7	3	9		28430	14_3_3 domain-containing protein OS=Setaria italica OX=4555 GN=101782762 PE=3 SV=1
64	91	tr|K3Y9H3|K3Y9H3_SETIT	105.68	19	7	3	9		29655	14_3_3 domain-containing protein OS=Setaria italica OX=4555 GN=101782762 PE=3 SV=1
64	92	tr|K7NED3|K7NED3_SETIT	105.68	19	7	3	9		29683	14-3-3 protein OS=Setaria italica OX=4555 PE=3 SV=1
58	86	tr|K4ABW3|K4ABW3_SETIT	105.53	13	8	8	10		39027	Uncharacterized protein OS=Setaria italica OX=4555 GN=101771598 PE=4 SV=1
56	144	tr|K3Y8Z6|K3Y8Z6_SETIT	104.08	13	6	6	10		34135	Uncharacterized protein OS=Setaria italica OX=4555 GN=101770894 PE=3 SV=1
49	77	tr|K3ZJ33|K3ZJ33_SETIT	103.72	15	10	9	12		37471	Uncharacterized protein OS=Setaria italica OX=4555 GN=101767284 PE=3 SV=1
49	78	tr|K3ZIV5|K3ZIV5_SETIT	103.72	14	10	9	12		40790	Uncharacterized protein OS=Setaria italica OX=4555 GN=101767284 PE=3 SV=1
49	79	tr|K3ZIV1|K3ZIV1_SETIT	103.72	14	10	9	12		40975	Uncharacterized protein OS=Setaria italica OX=4555 GN=101767284 PE=3 SV=1
48	98	tr|A0A368SKJ9|A0A368SKJ9_SETIT	102.53	12	11	11	12		52663	Aminotran_1_2 domain-containing protein OS=Setaria italica OX=4555 GN=SETIT_9G251000v2 PE=4 SV=1
48	99	tr|K4A868|K4A868_SETIT	102.53	10	11	11	12		59374	Aminotran_1_2 domain-containing protein OS=Setaria italica OX=4555 PE=4 SV=1
59	93	tr|A0A368PN19|A0A368PN19_SETIT	100.88	14	7	2	10		36426	Glyceraldehyde-3-phosphate dehydrogenase OS=Setaria italica OX=4555 GN=SETIT_1G221800v2 PE=3 SV=1
59	94	tr|K3YS38|K3YS38_SETIT	100.88	10	7	2	10		51746	Glyceraldehyde-3-phosphate dehydrogenase OS=Setaria italica OX=4555 PE=3 SV=1
68	88	tr|A0A368R8C9|A0A368R8C9_SETIT	98.26	6	7	1	8		62859	Ketol-acid reductoisomerase OS=Setaria italica OX=4555 GN=SETIT_5G246700v2 PE=3 SV=1
68	89	tr|K3XFT3|K3XFT3_SETIT	98.26	6	7	1	8		64928	Acetohydroxy-acid reductoisomerase OS=Setaria italica OX=4555 PE=3 SV=1
118	122	tr|K3YJA1|K3YJA1_SETIT	98.07	20	5	4	5		28767	14_3_3 domain-containing protein OS=Setaria italica OX=4555 GN=101782608 PE=3 SV=1
118	123	tr|K3YJ95|K3YJ95_SETIT	98.07	20	5	4	5		28865	14_3_3 domain-containing protein OS=Setaria italica OX=4555 GN=101760336 PE=3 SV=1
102	451	tr|K3Z925|K3Z925_SETIT	97.52	6	3	3	6		28612	40S ribosomal protein S6 OS=Setaria italica OX=4555 GN=101784158 PE=3 SV=1
102	452	tr|K3ZWC0|K3ZWC0_SETIT	97.52	6	3	3	6		28547	40S ribosomal protein S6 OS=Setaria italica OX=4555 GN=101782633 PE=3 SV=1
65	127	tr|K3Y8T0|K3Y8T0_SETIT	97.46	19	7	7	9		33682	Uncharacterized protein OS=Setaria italica OX=4555 GN=101776546 PE=4 SV=1
61	95	tr|K3ZJC2|K3ZJC2_SETIT	96.33	17	9	9	9		33380	Glyco_hydro_18 domain-containing protein OS=Setaria italica OX=4555 GN=101786936 PE=4 SV=1
76	133	tr|K3XQU0|K3XQU0_SETIT	95.98	9	5	5	7		41724	Uncharacterized protein OS=Setaria italica OX=4555 GN=101780312 PE=3 SV=1
75	225	tr|K3Z491|K3Z491_SETIT	95.7	4	5	5	7		74370	Uncharacterized protein OS=Setaria italica OX=4555 GN=101774685 PE=3 SV=1
83	115	tr|K4AFN8|K4AFN8_SETIT	94.89	24	7	2	7		19174	Uncharacterized protein OS=Setaria italica OX=4555 GN=101755263 PE=4 SV=1
77	82	tr|K3ZSU9|K3ZSU9_SETIT	94.07	12	6	6	7		53001	UTP--glucose-1-phosphate uridylyltransferase OS=Setaria italica OX=4555 GN=101786399 PE=3 SV=1
116	364	tr|K3ZAI0|K3ZAI0_SETIT	93.89	14	4	2	5		16531	UBC core domain-containing protein OS=Setaria italica OX=4555 GN=101769713 PE=3 SV=1
66	130	tr|K3Y6F3|K3Y6F3_SETIT	93.35	15	5	5	8		60427	Uncharacterized protein OS=Setaria italica OX=4555 GN=101770357 PE=3 SV=1
142	141	tr|K4AC12|K4AC12_SETIT	93.35	14	4	3	4		38899	Uncharacterized protein OS=Setaria italica OX=4555 GN=SETIT_9G417800v2 PE=4 SV=1
117	108	tr|K3ZJQ1|K3ZJQ1_SETIT	93.02	15	5	1	5		26188	14_3_3 domain-containing protein OS=Setaria italica OX=4555 GN=SETIT_8G146800v2 PE=3 SV=1
82	111	tr|K4AFG7|K4AFG7_SETIT	92.59	22	6	1	7		20374	Uncharacterized protein OS=Setaria italica OX=4555 GN=101755263 PE=4 SV=1
79	174	tr|K3XH96|K3XH96_SETIT	91.1	11	6	4	7		51117	Uncharacterized protein OS=Setaria italica OX=4555 GN=101772307 PE=3 SV=1
79	175	tr|K3XGU5|K3XGU5_SETIT	91.1	10	6	4	7		54206	Uncharacterized protein OS=Setaria italica OX=4555 GN=101772307 PE=3 SV=1
113	206	tr|K3Z721|K3Z721_SETIT	89.54	10	5	5	5		40621	AIR synthase OS=Setaria italica OX=4555 GN=101757143 PE=3 SV=1
147	266	tr|A0A368QFR8|A0A368QFR8_SETIT	88.9	7	3	3	4		36216	WD_REPEATS_REGION domain-containing protein OS=Setaria italica OX=4555 GN=SETIT_3G155500v2 PE=4 SV=1
147	267	tr|K3Z6V6|K3Z6V6_SETIT	88.9	6	3	3	4		42264	WD_REPEATS_REGION domain-containing protein OS=Setaria italica OX=4555 PE=4 SV=1
100	244	tr|K3YIS8|K3YIS8_SETIT	88.54	7	5	5	6		33423	Indole-3-glycerol-phosphate synthase OS=Setaria italica OX=4555 GN=101763023 PE=4 SV=1
100	245	tr|K3YI74|K3YI74_SETIT	88.54	6	5	5	6		40623	Indole-3-glycerol-phosphate synthase OS=Setaria italica OX=4555 GN=101763023 PE=3 SV=1
100	246	tr|K3YI55|K3YI55_SETIT	88.54	6	5	5	6		41592	Indole-3-glycerol-phosphate synthase OS=Setaria italica OX=4555 GN=101763023 PE=3 SV=1
71	152	tr|K4A5Z8|K4A5Z8_SETIT	87.94	8	7	7	8		89653	Uncharacterized protein OS=Setaria italica OX=4555 GN=101783641 PE=4 SV=1
71	153	tr|K4A5Y8|K4A5Y8_SETIT	87.94	8	7	7	8		89949	Uncharacterized protein OS=Setaria italica OX=4555 GN=101783353 PE=4 SV=1
74	143	tr|K3XX85|K3XX85_SETIT	87.9	10	7	5	7		47061	Uncharacterized protein OS=Setaria italica OX=4555 GN=101761364 PE=3 SV=1
141	139	tr|K3YIQ8|K3YIQ8_SETIT	87.76	10	4	4	4		33254	PKS_ER domain-containing protein OS=Setaria italica OX=4555 GN=101760873 PE=3 SV=1
141	140	tr|K3YI96|K3YI96_SETIT	87.76	9	4	4	4		39083	PKS_ER domain-containing protein OS=Setaria italica OX=4555 GN=101760873 PE=3 SV=1
53	155	tr|K4AG30|K4AG30_SETIT	86.57	22	9	2	10	Deamidation (NQ)	17753	Uncharacterized protein OS=Setaria italica OX=4555 GN=SETIT_9G294900v2 PE=4 SV=1
92	129	tr|K3XW75|K3XW75_SETIT	86.33	6	5	5	6		59227	Aldedh domain-containing protein OS=Setaria italica OX=4555 GN=101761749 PE=3 SV=1
62	131	tr|K3YIS9|K3YIS9_SETIT	85.61	9	6	1	9		32508	Glyceraldehyde-3-phosphate dehydrogenase OS=Setaria italica OX=4555 GN=101768835 PE=3 SV=1
62	132	tr|K3YIG5|K3YIG5_SETIT	85.61	8	6	1	9		36598	Glyceraldehyde-3-phosphate dehydrogenase OS=Setaria italica OX=4555 GN=101768835 PE=3 SV=1
89	125	tr|K3YPM5|K3YPM5_SETIT	85.57	5	6	6	6		108170	Ribonuclease OS=Setaria italica OX=4555 GN=101763417 PE=4 SV=1
89	126	tr|K3YPK7|K3YPK7_SETIT	85.57	5	6	6	6		110933	Ribonuclease OS=Setaria italica OX=4555 GN=101763417 PE=4 SV=1
107	137	tr|K4ACM3|K4ACM3_SETIT	85.25	11	4	4	5		36281	Translocase of chloroplast OS=Setaria italica OX=4555 GN=101784033 PE=3 SV=1
60	150	tr|K4AG33|K4AG33_SETIT	85	22	8	1	9	Deamidation (NQ)	17726	Uncharacterized protein OS=Setaria italica OX=4555 GN=101753655 PE=4 SV=1
103	142	tr|K3Z414|K3Z414_SETIT	83.75	5	5	5	5	Acetylation (Protein N-term)	84464	5-methyltetrahydropteroyltriglutamate--homocysteine S-methyltransferase OS=Setaria italica OX=4555 GN=101772515 PE=3 SV=1
104	274	tr|A0A368SUH7|A0A368SUH7_SETIT	82.94	4	5	5	5		68515	Cupin type-1 domain-containing protein OS=Setaria italica OX=4555 GN=SETIT_9G504700v2 PE=4 SV=1
90	112	tr|K3XFZ2|K3XFZ2_SETIT	81.64	9	5	3	6		63382	Transketolase OS=Setaria italica OX=4555 GN=101776231 PE=3 SV=1
90	113	tr|K3XF05|K3XF05_SETIT	81.64	7	5	3	6		78020	Transketolase OS=Setaria italica OX=4555 GN=101776231 PE=3 SV=1
97	310	tr|K3XXL8|K3XXL8_SETIT	81.63	6	4	4	6		41468	Formate dehydrogenase mitochondrial OS=Setaria italica OX=4555 GN=101767583 PE=3 SV=1
72	180	tr|K3XVT0|K3XVT0_SETIT	81.44	3	6	6	8		71080	Starch synthase chloroplastic/amyloplastic OS=Setaria italica OX=4555 GN=101758779 PE=3 SV=1
94	177	tr|K3Z5J2|K3Z5J2_SETIT	81.33	8	5	3	6		54159	Uncharacterized protein OS=Setaria italica OX=4555 GN=101763215 PE=3 SV=1
188	270	tr|A0A368RG03|A0A368RG03_SETIT	80.14	7	3	1	3		23934	Germin-like protein OS=Setaria italica OX=4555 GN=SETIT_5G454900v2 PE=3 SV=1
131	117	tr|A0A368RWJ8|A0A368RWJ8_SETIT	80.05	6	4	4	4		67196	Uncharacterized protein OS=Setaria italica OX=4555 GN=SETIT_7G164500v2 PE=3 SV=1
131	118	tr|K3Y6Q3|K3Y6Q3_SETIT	80.05	7	4	4	4		57557	Uncharacterized protein OS=Setaria italica OX=4555 PE=3 SV=1
131	119	tr|K3Y6N0|K3Y6N0_SETIT	80.05	7	4	4	4		58082	Uncharacterized protein OS=Setaria italica OX=4555 PE=3 SV=1
99	204	tr|A0A368S3S4|A0A368S3S4_SETIT	79.78	9	5	5	6		48640	Purple acid phosphatase OS=Setaria italica OX=4555 GN=SETIT_8G033400v2 PE=3 SV=1
124	149	tr|K3ZTE0|K3ZTE0_SETIT	78.46	7	3	3	4		49033	eRF1_1 domain-containing protein OS=Setaria italica OX=4555 GN=101780068 PE=3 SV=1
86	479	tr|A0A368QH28|A0A368QH28_SETIT	78.38	17	4	4	7		15187	40S ribosomal protein S26 OS=Setaria italica OX=4555 GN=SETIT_3G205000v2 PE=3 SV=1
98	158	tr|K3Z9K9|K3Z9K9_SETIT	78.36	16	4	4	6	Deamidation (NQ)	23419	Uncharacterized protein OS=Setaria italica OX=4555 GN=101759688 PE=4 SV=1
98	159	tr|K3Z9I0|K3Z9I0_SETIT	78.36	16	4	4	6	Deamidation (NQ)	23833	Uncharacterized protein OS=Setaria italica OX=4555 GN=101759688 PE=4 SV=1
160	172	tr|K4ADX3|K4ADX3_SETIT	76.87	13	3	3	3		27132	Uncharacterized protein OS=Setaria italica OX=4555 GN=101752562 PE=3 SV=1
106	124	tr|K3YHD2|K3YHD2_SETIT	75.56	10	5	5	5		53324	Adenosylhomocysteinase OS=Setaria italica OX=4555 GN=101786236 PE=3 SV=1
119	286	tr|A0A368R2W9|A0A368R2W9_SETIT	74.87	13	3	1	5		17034	SHSP domain-containing protein OS=Setaria italica OX=4555 GN=SETIT_5G093000v2 PE=3 SV=1
120	292	tr|K4AG64|K4AG64_SETIT	74.6	13	3	1	5		17587	SHSP domain-containing protein OS=Setaria italica OX=4555 GN=101770955 PE=3 SV=1
84	170	tr|A0A368RIK8|A0A368RIK8_SETIT	74.5	18	6	6	7		25487	KH type-2 domain-containing protein OS=Setaria italica OX=4555 GN=SETIT_6G050300v2 PE=3 SV=1
84	171	tr|K3YIJ8|K3YIJ8_SETIT	74.5	12	6	6	7		36567	KH type-2 domain-containing protein OS=Setaria italica OX=4555 PE=3 SV=1
133	255	tr|K3XZS6|K3XZS6_SETIT	73.8	34	4	2	4	Oxidation (M); Deamidation (NQ)	16534	UBC core domain-containing protein OS=Setaria italica OX=4555 GN=101784577 PE=3 SV=1
108	269	tr|K3XFF0|K3XFF0_SETIT	73.72	3	4	3	5	Oxidation (M)	70934	Uncharacterized protein OS=Setaria italica OX=4555 GN=101756252 PE=3 SV=1
108	277	tr|K4A6V7|K4A6V7_SETIT	73.72	3	4	3	5	Oxidation (M)	71285	Uncharacterized protein OS=Setaria italica OX=4555 GN=101764302 PE=3 SV=1
150	226	tr|K3YPB4|K3YPB4_SETIT	73.07	3	3	3	3	Deamidation (NQ)	148159	Tripeptidyl-peptidase II OS=Setaria italica OX=4555 GN=101765055 PE=3 SV=1
114	223	tr|K3YJR7|K3YJR7_SETIT	72.98	15	5	5	5		21599	Ribosomal_S13_N domain-containing protein OS=Setaria italica OX=4555 PE=3 SV=1
114	224	tr|A0A368RJE2|A0A368RJE2_SETIT	72.98	14	5	5	5		23378	Ribosomal_S13_N domain-containing protein OS=Setaria italica OX=4555 GN=SETIT_6G084900v2 PE=3 SV=1
91	114	tr|K3YGB5|K3YGB5_SETIT	72.91	5	4	4	6		88770	HATPase_c domain-containing protein OS=Setaria italica OX=4555 GN=101769528 PE=3 SV=1
162	240	tr|K3ZXN8|K3ZXN8_SETIT	72.37	16	3	1	3		15626	Oleosin OS=Setaria italica OX=4555 GN=101783574 PE=3 SV=1
95	198	tr|K3XXC5|K3XXC5_SETIT	71.73	14	5	1	6		42378	Phosphoglycerate kinase OS=Setaria italica OX=4555 GN=101775268 PE=3 SV=1
101	218	tr|K3Y982|K3Y982_SETIT	71.67	7	4	4	6		30780	Prohibitin OS=Setaria italica OX=4555 GN=101783972 PE=3 SV=1
101	219	tr|A0A368RUZ9|A0A368RUZ9_SETIT	71.67	7	4	4	6		31749	Prohibitin OS=Setaria italica OX=4555 GN=SETIT_7G126300v2 PE=3 SV=1
112	192	tr|K3ZIS5|K3ZIS5_SETIT	71.26	9	5	5	5		44527	Uncharacterized protein OS=Setaria italica OX=4555 GN=SETIT_8G046000v2 PE=3 SV=1
112	193	tr|K3Y7W6|K3Y7W6_SETIT	71.26	9	5	5	5		44469	Uncharacterized protein OS=Setaria italica OX=4555 GN=101769426 PE=3 SV=1
143	183	tr|K3Z8V1|K3Z8V1_SETIT	71.1	11	4	4	4		29950	40S ribosomal protein S4 OS=Setaria italica OX=4555 GN=101775084 PE=3 SV=1
161	239	tr|A0A368R694|A0A368R694_SETIT	70.75	4	2	1	3		73535	Uncharacterized protein OS=Setaria italica OX=4555 GN=SETIT_5G187000v2 PE=3 SV=1
96	214	tr|K3Z5U9|K3Z5U9_SETIT	70.7	11	5	1	6		49686	Phosphoglycerate kinase OS=Setaria italica OX=4555 GN=101765234 PE=3 SV=1
87	167	tr|K3XG76|K3XG76_SETIT	70.62	10	6	6	6	Deamidation (NQ)	58867	ATP synthase subunit beta OS=Setaria italica OX=4555 GN=101778408 PE=3 SV=1
87	168	tr|A0A368R9P2|A0A368R9P2_SETIT	70.62	10	6	6	6	Deamidation (NQ)	59157	ATP synthase subunit beta OS=Setaria italica OX=4555 GN=SETIT_5G274400v2 PE=3 SV=1
87	169	tr|K3XFL3|K3XFL3_SETIT	70.62	9	6	6	6	Deamidation (NQ)	66632	ATP synthase subunit beta OS=Setaria italica OX=4555 PE=3 SV=1
271	268	tr|A0A368QNT9|A0A368QNT9_SETIT	70.56	4	2	1	2		73449	Uncharacterized protein OS=Setaria italica OX=4555 GN=SETIT_3G341900v2 PE=3 SV=1
137	275	tr|K4ACV7|K4ACV7_SETIT	70.28	7	4	4	4		35189	Aldo_ket_red domain-containing protein OS=Setaria italica OX=4555 GN=101757435 PE=3 SV=1
137	278	tr|A0A368STJ1|A0A368STJ1_SETIT	70.28	6	4	4	4		40023	Aldo_ket_red domain-containing protein OS=Setaria italica OX=4555 GN=SETIT_9G476100v2 PE=3 SV=1
163	273	tr|K3XVH0|K3XVH0_SETIT	70.26	4	3	1	3		79853	Transketolase OS=Setaria italica OX=4555 GN=SETIT_4G023100v2 PE=3 SV=1
144	189	tr|K3XRX2|K3XRX2_SETIT	70.17	12	4	4	4		27566	Uncharacterized protein OS=Setaria italica OX=4555 GN=101770719 PE=3 SV=1
85	354	tr|K4A8M7|K4A8M7_SETIT	69.81	7	4	4	7		56797	Uncharacterized protein OS=Setaria italica OX=4555 GN=101772010 PE=3 SV=1
110	161	tr|A0A368RP91|A0A368RP91_SETIT	69.64	4	4	4	5	Oxidation (M)	88732	Aamy domain-containing protein OS=Setaria italica OX=4555 GN=SETIT_6G211200v2 PE=4 SV=1
153	207	tr|K3YQ62|K3YQ62_SETIT	69.6	4	3	1	3		79710	H(+)-exporting diphosphatase OS=Setaria italica OX=4555 GN=101763159 PE=3 SV=1
152	209	tr|K3XVH8|K3XVH8_SETIT	69.49	4	3	1	3		76803	H(+)-exporting diphosphatase OS=Setaria italica OX=4555 GN=101758107 PE=4 SV=1
152	210	tr|K3YQ53|K3YQ53_SETIT	69.49	4	3	1	3		80034	H(+)-exporting diphosphatase OS=Setaria italica OX=4555 GN=101780838 PE=3 SV=1
152	211	tr|K3YQJ3|K3YQJ3_SETIT	69.49	5	3	1	3		71586	H(+)-exporting diphosphatase OS=Setaria italica OX=4555 GN=101780838 PE=3 SV=1
152	212	tr|A0A368QW59|A0A368QW59_SETIT	69.49	4	3	1	3		77236	H(+)-exporting diphosphatase OS=Setaria italica OX=4555 GN=SETIT_4G201600v2 PE=3 SV=1
152	213	tr|K3XVE9|K3XVE9_SETIT	69.49	4	3	1	3		80486	H(+)-exporting diphosphatase OS=Setaria italica OX=4555 GN=101758107 PE=3 SV=1
109	157	tr|K3YTL8|K3YTL8_SETIT	69.09	11	5	1	5	Deamidation (NQ)	38684	Fructose-bisphosphate aldolase OS=Setaria italica OX=4555 GN=101754112 PE=3 SV=1
127	162	tr|K4AE37|K4AE37_SETIT	69.02	16	4	4	4		27883	Uncharacterized protein OS=Setaria italica OX=4555 PE=3 SV=1
127	163	tr|A0A368STT0|A0A368STT0_SETIT	69.02	15	4	4	4		30105	Uncharacterized protein OS=Setaria italica OX=4555 GN=SETIT_9G486300v2 PE=3 SV=1
127	164	tr|K4ACH7|K4ACH7_SETIT	69.02	12	4	4	4		36110	Uncharacterized protein OS=Setaria italica OX=4555 PE=3 SV=1
111	190	tr|K3Z5F3|K3Z5F3_SETIT	68.15	5	4	1	5		57509	Glucose-1-phosphate adenylyltransferase OS=Setaria italica OX=4555 GN=101765110 PE=3 SV=1
190	330	tr|K3YY94|K3YY94_SETIT	67.86	9	3	1	3		21476	Germin-like protein OS=Setaria italica OX=4555 PE=3 SV=1
190	331	tr|A0A368PI45|A0A368PI45_SETIT	67.86	8	3	1	3		23204	Germin-like protein OS=Setaria italica OX=4555 GN=SETIT_1G075900v2 PE=3 SV=1
105	181	tr|K3Z0Y5|K3Z0Y5_SETIT	67.51	6	5	5	5	Deamidation (NQ)	77983	Uncharacterized protein OS=Setaria italica OX=4555 PE=4 SV=1
105	182	tr|A0A368PIE5|A0A368PIE5_SETIT	67.51	5	5	5	5	Deamidation (NQ)	80654	Uncharacterized protein OS=Setaria italica OX=4555 GN=SETIT_1G092900v2 PE=4 SV=1
228	259	tr|K3Z4G5|K3Z4G5_SETIT	67.38	4	2	1	2		71121	Uncharacterized protein OS=Setaria italica OX=4555 GN=101777821 PE=3 SV=1
272	271	tr|K3ZX77|K3ZX77_SETIT	65.99	11	2	2	2		20944	Ribosomal_L18e/L15P domain-containing protein OS=Setaria italica OX=4555 GN=101773860 PE=3 SV=1
272	272	tr|K4AFL1|K4AFL1_SETIT	65.99	11	2	2	2		21026	Ribosomal_L18e/L15P domain-containing protein OS=Setaria italica OX=4555 GN=SETIT_9G410200v2 PE=3 SV=1
129	341	tr|K4ACY4|K4ACY4_SETIT	65.95	10	4	4	4		33399	40S ribosomal protein SA OS=Setaria italica OX=4555 GN=101775951 PE=3 SV=1
136	184	tr|K3ZQC3|K3ZQC3_SETIT	65.58	3	4	4	4		114899	Transket_pyr domain-containing protein OS=Setaria italica OX=4555 GN=101761972 PE=3 SV=1
115	322	tr|K3XL70|K3XL70_SETIT	65.58	10	5	5	5		26451	Malate dehydrogenase OS=Setaria italica OX=4555 GN=101760979 PE=3 SV=1
115	323	tr|K3XJN7|K3XJN7_SETIT	65.58	8	5	5	5		35480	Malate dehydrogenase OS=Setaria italica OX=4555 GN=101760979 PE=3 SV=1
128	187	tr|A0A368QAZ7|A0A368QAZ7_SETIT	65.48	3	4	4	4		123465	Leucyl-tRNA synthetase OS=Setaria italica OX=4555 GN=SETIT_3G035800v2 PE=3 SV=1
128	188	tr|K3Z396|K3Z396_SETIT	65.48	3	4	4	4		135629	Leucyl-tRNA synthetase OS=Setaria italica OX=4555 PE=3 SV=1
157	312	tr|K4A5D2|K4A5D2_SETIT	64.48	2	3	3	3		108843	Clp R domain-containing protein OS=Setaria italica OX=4555 GN=101778648 PE=3 SV=1
186	228	tr|K3Z5M4|K3Z5M4_SETIT	63.95	6	3	3	3		56468	Glutamate--cysteine ligase OS=Setaria italica OX=4555 GN=101753211 PE=3 SV=1
216	242	tr|K3XK90|K3XK90_SETIT	62.75	6	2	2	2		34753	Chorismate mutase OS=Setaria italica OX=4555 GN=101783394 PE=4 SV=1
88	315	tr|K3YGH8|K3YGH8_SETIT	62.65	4	4	4	6		80258	HATPase_c domain-containing protein OS=Setaria italica OX=4555 GN=SETIT_6G200300v2 PE=3 SV=1
88	316	tr|K3YGH9|K3YGH9_SETIT	62.65	4	4	4	6		80187	HATPase_c domain-containing protein OS=Setaria italica OX=4555 GN=SETIT_6G200200v2 PE=3 SV=1
88	321	tr|K3YH43|K3YH43_SETIT	62.65	6	4	4	6		61276	Uncharacterized protein OS=Setaria italica OX=4555 GN=SETIT_6G200000v2 PE=3 SV=1
80	185	tr|K3XLR2|K3XLR2_SETIT	62.59	14	4	4	7		25174	GTP-binding nuclear protein OS=Setaria italica OX=4555 GN=101757722 PE=3 SV=1
80	186	tr|K3XL71|K3XL71_SETIT	62.59	12	4	4	7		29148	GTP-binding nuclear protein OS=Setaria italica OX=4555 GN=101757722 PE=3 SV=1
239	260	tr|K3YG70|K3YG70_SETIT	62.28	2	2	2	2		98348	Aminopeptidase OS=Setaria italica OX=4555 GN=101778842 PE=3 SV=1
241	281	tr|A0A368R121|A0A368R121_SETIT	61.96	6	2	2	2		43262	S-adenosylmethionine synthase OS=Setaria italica OX=4555 GN=SETIT_5G030700v2 PE=3 SV=1
241	282	tr|A0A368QC05|A0A368QC05_SETIT	61.96	6	2	2	2		43145	S-adenosylmethionine synthase OS=Setaria italica OX=4555 GN=SETIT_3G053400v2 PE=3 SV=1
241	283	tr|K3XHM9|K3XHM9_SETIT	61.96	6	2	2	2		49696	S-adenosylmethionine synthase OS=Setaria italica OX=4555 PE=3 SV=1
241	284	tr|K3Z636|K3Z636_SETIT	61.96	5	2	2	2		49470	S-adenosylmethionine synthase OS=Setaria italica OX=4555 GN=101764969 PE=3 SV=1
194	376	tr|K3ZVP6|K3ZVP6_SETIT	61.66	6	3	1	3		33138	Uncharacterized protein OS=Setaria italica OX=4555 PE=4 SV=1
194	377	tr|A0A368PVZ5|A0A368PVZ5_SETIT	61.66	2	3	1	3		107533	Pre-mRNA-processing factor 19 OS=Setaria italica OX=4555 GN=SETIT_2G060500v2 PE=3 SV=1
182	154	tr|K3ZSV7|K3ZSV7_SETIT	60.88	7	3	3	3		53478	Xylose isomerase OS=Setaria italica OX=4555 GN=101755351 PE=3 SV=1
121	313	tr|K3YRQ5|K3YRQ5_SETIT	60.69	6	5	5	5		54927	3-isopropylmalate dehydratase OS=Setaria italica OX=4555 GN=101766127 PE=4 SV=1
132	194	tr|A0A368QBX2|A0A368QBX2_SETIT	59.54	8	4	4	4		45902	Uncharacterized protein OS=Setaria italica OX=4555 GN=SETIT_3G056300v2 PE=4 SV=1
189	293	tr|K3ZAL1|K3ZAL1_SETIT	59.29	15	3	2	3		14959	Histone H2A OS=Setaria italica OX=4555 GN=101765107 PE=3 SV=1
189	294	tr|K3ZAE8|K3ZAE8_SETIT	59.29	14	3	2	3		16313	Histone H2A OS=Setaria italica OX=4555 GN=101765107 PE=3 SV=1
189	295	tr|K3ZXN1|K3ZXN1_SETIT	59.29	13	3	2	3		16294	Histone H2A OS=Setaria italica OX=4555 GN=105913908 PE=3 SV=1
189	296	tr|K3XMR4|K3XMR4_SETIT	59.29	13	3	2	3		16464	Histone H2A OS=Setaria italica OX=4555 GN=101769640 PE=3 SV=1
189	297	tr|K4AG42|K4AG42_SETIT	59.29	13	3	2	3		16512	Histone H2A OS=Setaria italica OX=4555 GN=101771744 PE=3 SV=1
189	298	tr|K3ZAC4|K3ZAC4_SETIT	59.29	13	3	2	3		16929	Histone H2A OS=Setaria italica OX=4555 GN=101779834 PE=3 SV=1
189	299	tr|K3XPK2|K3XPK2_SETIT	59.29	13	3	2	3		17293	Histone H2A OS=Setaria italica OX=4555 PE=3 SV=1
145	195	tr|K3ZK93|K3ZK93_SETIT	59.26	21	3	2	4		14129	Histone H2A OS=Setaria italica OX=4555 GN=101771838 PE=3 SV=1
145	196	tr|A0A368SF19|A0A368SF19_SETIT	59.26	20	3	2	4		14459	Histone H2A OS=Setaria italica OX=4555 GN=SETIT_9G097100v2 PE=3 SV=1
145	197	tr|K4AGG0|K4AGG0_SETIT	59.26	20	3	2	4		14570	Histone H2A OS=Setaria italica OX=4555 GN=101757439 PE=3 SV=1
139	320	tr|K3ZJX2|K3ZJX2_SETIT	59.15	11	3	3	4		22150	Ribosomal_S7 domain-containing protein OS=Setaria italica OX=4555 GN=101756850 PE=3 SV=1
125	178	tr|K3Z4Q2|K3Z4Q2_SETIT	58.88	6	4	4	4		66768	Aldedh domain-containing protein OS=Setaria italica OX=4555 GN=101770922 PE=3 SV=1
125	179	tr|K3Z4P0|K3Z4P0_SETIT	58.88	6	4	4	4		67213	Aldedh domain-containing protein OS=Setaria italica OX=4555 GN=101770922 PE=3 SV=1
146	203	tr|K3YRW8|K3YRW8_SETIT	58.55	4	4	4	4		53288	Ubiquitin-like modifier-activating enzyme 5 OS=Setaria italica OX=4555 GN=SETIT_1G167900v2 PE=3 SV=1
206	393	tr|K3Y5B8|K3Y5B8_SETIT	58.41	1	2	2	2		85998	MI domain-containing protein OS=Setaria italica OX=4555 GN=101778322 PE=4 SV=1
191	344	tr|K3YGY6|K3YGY6_SETIT	57.78	5	3	3	3		61946	Peptidylprolyl isomerase OS=Setaria italica OX=4555 GN=101782607 PE=4 SV=1
238	256	tr|A0A368RVK6|A0A368RVK6_SETIT	57.53	4	2	2	2		55884	Malate synthase OS=Setaria italica OX=4555 GN=SETIT_7G144600v2 PE=3 SV=1
238	257	tr|A0A368RVU7|A0A368RVU7_SETIT	57.53	4	2	2	2		55865	Malate synthase OS=Setaria italica OX=4555 GN=SETIT_7G144600v2 PE=3 SV=1
238	258	tr|A0A368RVQ5|A0A368RVQ5_SETIT	57.53	4	2	2	2		56877	Malate synthase OS=Setaria italica OX=4555 GN=SETIT_7G144600v2 PE=3 SV=1
155	237	tr|A0A368PHD9|A0A368PHD9_SETIT	57.12	6	2	2	3		46386	Uncharacterized protein OS=Setaria italica OX=4555 GN=SETIT_1G004500v2 PE=4 SV=1
155	238	tr|K3YRI7|K3YRI7_SETIT	57.12	5	2	2	3		59099	Uncharacterized protein OS=Setaria italica OX=4555 PE=4 SV=1
325	381	tr|K3ZQG9|K3ZQG9_SETIT	56.5	2	1	1	1		105678	Eukaryotic translation initiation factor 3 subunit C OS=Setaria italica OX=4555 GN=101760068 PE=3 SV=1
275	307	tr|A0A368SLF2|A0A368SLF2_SETIT	55.91	5	2	2	2		39902	DUF1338 domain-containing protein OS=Setaria italica OX=4555 GN=SETIT_9G230800v2 PE=4 SV=1
185	220	tr|A0A368PTL3|A0A368PTL3_SETIT	55.65	6	3	3	3		51812	Phosphoglycerate mutase (2 3-diphosphoglycerate-independent) OS=Setaria italica OX=4555 GN=SETIT_1G315800v2 PE=3 SV=1
185	221	tr|A0A368RCK6|A0A368RCK6_SETIT	55.65	5	3	3	3		60505	Phosphoglycerate mutase (2 3-diphosphoglycerate-independent) OS=Setaria italica OX=4555 GN=SETIT_5G359900v2 PE=3 SV=1
185	222	tr|K3XFX0|K3XFX0_SETIT	55.65	5	3	3	3		63646	Phosphoglycerate mutase (2 3-diphosphoglycerate-independent) OS=Setaria italica OX=4555 PE=3 SV=1
211	328	tr|K3Z3Y4|K3Z3Y4_SETIT	55.46	3	2	1	2		84889	H(+)-exporting diphosphatase OS=Setaria italica OX=4555 GN=101780777 PE=3 SV=1
211	333	tr|K4A607|K4A607_SETIT	55.46	3	2	1	2		84689	H(+)-exporting diphosphatase OS=Setaria italica OX=4555 GN=101774456 PE=3 SV=1
209	317	tr|K4A6V8|K4A6V8_SETIT	55.44	3	2	2	2		70251	Phosphoglucomutase (alpha-D-glucose-1 6-bisphosphate-dependent) OS=Setaria italica OX=4555 GN=SETIT_9G118400v2 PE=3 SV=1
183	199	tr|K3ZI04|K3ZI04_SETIT	54.88	5	3	3	3		57366	Pyruvate kinase OS=Setaria italica OX=4555 GN=101780488 PE=3 SV=1
183	200	tr|A0A368S275|A0A368S275_SETIT	54.88	5	3	3	3		57318	Pyruvate kinase OS=Setaria italica OX=4555 GN=SETIT_7G319500v2 PE=3 SV=1
183	201	tr|K3Y5R7|K3Y5R7_SETIT	54.88	4	3	3	3		72532	Pyruvate kinase OS=Setaria italica OX=4555 PE=3 SV=1
237	243	tr|K3ZVC4|K3ZVC4_SETIT	54.82	6	2	2	2		34488	60S acidic ribosomal protein P0 OS=Setaria italica OX=4555 GN=101764539 PE=3 SV=1
165	629	tr|K3ZTV9|K3ZTV9_SETIT	54.66	2	3	3	3		44551	Ribos_L4_asso_C domain-containing protein OS=Setaria italica OX=4555 GN=101763849 PE=3 SV=1
165	635	tr|K4A2N9|K4A2N9_SETIT	54.66	4	3	3	3		29521	Uncharacterized protein OS=Setaria italica OX=4555 GN=SETIT_2G107700v2 PE=3 SV=1
240	264	tr|K4A7I4|K4A7I4_SETIT	54.55	3	2	1	2		61646	Uncharacterized protein OS=Setaria italica OX=4555 GN=101786301 PE=3 SV=1
184	205	tr|K3ZAN2|K3ZAN2_SETIT	54.54	18	3	3	3		14951	AAI domain-containing protein OS=Setaria italica OX=4555 GN=101783999 PE=4 SV=1
175	429	tr|A0A368SHQ9|A0A368SHQ9_SETIT	53.98	2	2	2	3		77458	Lysine--tRNA ligase OS=Setaria italica OX=4555 GN=SETIT_9G178100v2 PE=3 SV=1
175	430	tr|K4A654|K4A654_SETIT	53.98	2	2	2	3		85859	Lysine--tRNA ligase OS=Setaria italica OX=4555 PE=3 SV=1
175	431	tr|K4A642|K4A642_SETIT	53.98	2	2	2	3		86345	Lysine--tRNA ligase OS=Setaria italica OX=4555 PE=3 SV=1
253	455	tr|A0A368Q556|A0A368Q556_SETIT	53.78	18	1	1	2		9220	Uncharacterized protein OS=Setaria italica OX=4555 GN=SETIT_2G307500v2 PE=4 SV=1
253	456	tr|K4A196|K4A196_SETIT	53.78	12	1	1	2		13115	Uncharacterized protein OS=Setaria italica OX=4555 PE=4 SV=1
284	563	tr|K3YEK7|K3YEK7_SETIT	53.54	4	2	2	2		38533	Aldose 1-epimerase OS=Setaria italica OX=4555 GN=101771020 PE=3 SV=1
284	564	tr|A0A368RUP4|A0A368RUP4_SETIT	53.54	4	2	2	2		39144	Aldose 1-epimerase OS=Setaria italica OX=4555 GN=SETIT_7G122800v2 PE=3 SV=1
284	565	tr|K3Y7G3|K3Y7G3_SETIT	53.54	3	2	2	2		46189	Uncharacterized protein OS=Setaria italica OX=4555 PE=4 SV=1
134	334	tr|K4ADP9|K4ADP9_SETIT	52.85	8	4	4	4		29922	S5 DRBM domain-containing protein OS=Setaria italica OX=4555 GN=101768239 PE=3 SV=1
134	335	tr|K3ZVW2|K3ZVW2_SETIT	52.85	8	4	4	4		30342	S5 DRBM domain-containing protein OS=Setaria italica OX=4555 GN=101757621 PE=3 SV=1
202	236	tr|Q84TQ6|Q84TQ6_SETIT	52.45	1	2	2	2		256508	Acetyl-CoA carboxylase OS=Setaria italica OX=4555 GN=ACC-S PE=2 SV=1
202	247	tr|Q84TQ5|Q84TQ5_SETIT	52.45	1	2	2	2		256501	Acetyl-CoA carboxylase OS=Setaria italica OX=4555 GN=ACC-R PE=2 SV=1
202	248	tr|K3Y4M1|K3Y4M1_SETIT	52.45	1	2	2	2		256531	Acetyl-CoA carboxylase OS=Setaria italica OX=4555 GN=101781270 PE=4 SV=1
202	249	tr|Q947M6|Q947M6_SETIT	52.45	1	2	2	2		256513	Acetyl-CoA carboxylase OS=Setaria italica OX=4555 GN=Acc-1 PE=2 SV=1
202	250	tr|A0A368RRG7|A0A368RRG7_SETIT	52.45	1	2	2	2		256618	Acetyl-CoA carboxylase OS=Setaria italica OX=4555 GN=SETIT_7G030200v2 PE=4 SV=1
242	285	tr|K3YYT9|K3YYT9_SETIT	52.38	3	2	2	2		69376	Acetolactate synthase OS=Setaria italica OX=4555 GN=101778558 PE=3 SV=1
273	301	tr|K3YTB3|K3YTB3_SETIT	51.43	5	2	1	2		40739	S-(hydroxymethyl)glutathione dehydrogenase OS=Setaria italica OX=4555 GN=101766550 PE=3 SV=1
621	458	tr|K3YVL3|K3YVL3_SETIT	50.84	5	1	1	1		24363	60S ribosomal protein L6 OS=Setaria italica OX=4555 GN=101772071 PE=3 SV=1
621	459	tr|K3Y9Y1|K3Y9Y1_SETIT	50.84	5	1	1	1		24412	60S ribosomal protein L6 OS=Setaria italica OX=4555 GN=101776968 PE=3 SV=1
170	314	tr|K3XIB8|K3XIB8_SETIT	50.43	4	3	1	3		43371	Peptidase A1 domain-containing protein OS=Setaria italica OX=4555 GN=101781509 PE=4 SV=1
245	318	tr|K3ZH11|K3ZH11_SETIT	49.5	2	2	2	2		117150	E1 ubiquitin-activating enzyme OS=Setaria italica OX=4555 GN=101778880 PE=3 SV=1
245	325	tr|K3Y4U3|K3Y4U3_SETIT	49.5	2	2	2	2		116997	E1 ubiquitin-activating enzyme OS=Setaria italica OX=4555 GN=101771818 PE=3 SV=1
213	386	tr|K3YR95|K3YR95_SETIT	49.33	2	1	1	2		58357	CYTOSOL_AP domain-containing protein OS=Setaria italica OX=4555 PE=3 SV=1
213	387	tr|K3YR24|K3YR24_SETIT	49.33	2	1	1	2		61651	CYTOSOL_AP domain-containing protein OS=Setaria italica OX=4555 GN=SETIT_1G350000v2 PE=3 SV=1
213	401	tr|K3YSU9|K3YSU9_SETIT	49.33	3	1	1	2		42991	Uncharacterized protein OS=Setaria italica OX=4555 PE=3 SV=1
81	303	tr|K3XHT1|K3XHT1_SETIT	49.15	5	2	2	7		47762	M20_dimer domain-containing protein OS=Setaria italica OX=4555 GN=101756368 PE=3 SV=1
250	371	tr|K3ZRC0|K3ZRC0_SETIT	49.11	3	2	2	2		71769	Polyadenylate-binding protein OS=Setaria italica OX=4555 GN=101772489 PE=3 SV=1
173	375	tr|K3XR44|K3XR44_SETIT	49.02	5	3	1	3		43661	Uncharacterized protein OS=Setaria italica OX=4555 GN=101781915 PE=4 SV=1
282	536	tr|K3ZZW7|K3ZZW7_SETIT	48.84	2	2	2	2		44544	Protein-synthesizing GTPase OS=Setaria italica OX=4555 PE=4 SV=1
282	537	tr|A0A368Q6C0|A0A368Q6C0_SETIT	48.84	2	2	2	2		44926	Tr-type G domain-containing protein OS=Setaria italica OX=4555 GN=SETIT_2G355400v2 PE=4 SV=1
282	538	tr|K3YHH7|K3YHH7_SETIT	48.84	2	2	2	2		50749	Protein-synthesizing GTPase OS=Setaria italica OX=4555 GN=101756390 PE=4 SV=1
282	539	tr|K3ZIC8|K3ZIC8_SETIT	48.84	2	2	2	2		50818	Protein-synthesizing GTPase OS=Setaria italica OX=4555 GN=101759964 PE=4 SV=1
217	347	tr|A0A368SQ68|A0A368SQ68_SETIT	48.83	7	2	2	2	Acetylation (Protein N-term)	36386	Histone domain-containing protein OS=Setaria italica OX=4555 GN=SETIT_9G378800v2 PE=3 SV=1
274	304	tr|K3ZXU6|K3ZXU6_SETIT	48.53	13	2	2	2	Oxidation (M)	16213	Uncharacterized protein OS=Setaria italica OX=4555 GN=101762630 PE=3 SV=1
274	305	tr|K4AGC1|K4AGC1_SETIT	48.53	13	2	2	2	Oxidation (M)	16214	Uncharacterized protein OS=Setaria italica OX=4555 GN=101781204 PE=3 SV=1
274	306	tr|K4AGC5|K4AGC5_SETIT	48.53	13	2	2	2	Oxidation (M)	16217	Uncharacterized protein OS=Setaria italica OX=4555 GN=101764338 PE=3 SV=1
174	378	tr|A0A368SF31|A0A368SF31_SETIT	48.25	3	3	1	3		78455	Homeobox domain-containing protein OS=Setaria italica OX=4555 GN=SETIT_9G105300v2 PE=3 SV=1
174	416	tr|K4AJL1|K4AJL1_SETIT	48.25	4	3	1	3		63886	POX domain-containing protein OS=Setaria italica OX=4555 PE=3 SV=1
249	367	tr|K3ZUW3|K3ZUW3_SETIT	48.22	5	2	1	2		38461	Uncharacterized protein OS=Setaria italica OX=4555 GN=SETIT_2G436200v2 PE=4 SV=1
394	411	tr|K3XKF1|K3XKF1_SETIT	48.19	4	1	1	1		34516	Ribosomal_L18_c domain-containing protein OS=Setaria italica OX=4555 GN=101764495 PE=3 SV=1
394	433	tr|K3XLL7|K3XLL7_SETIT	48.19	5	1	1	1		25911	Ribosomal_L18_c domain-containing protein OS=Setaria italica OX=4555 GN=101764495 PE=3 SV=1
212	379	tr|K3YGR0|K3YGR0_SETIT	47.56	3	1	1	2		67260	Pyrophosphate--fructose 6-phosphate 1-phosphotransferase subunit alpha OS=Setaria italica OX=4555 GN=101760195 PE=3 SV=1
176	432	tr|K3YJI1|K3YJI1_SETIT	47.16	6	3	3	3		25384	Uncharacterized protein OS=Setaria italica OX=4555 GN=101772473 PE=3 SV=1
156	279	tr|K3YS57|K3YS57_SETIT	47.15	4	2	2	3		52517	Citrate synthase OS=Setaria italica OX=4555 GN=101786364 PE=3 SV=1
156	280	tr|K3YRV8|K3YRV8_SETIT	47.15	4	2	2	3		55666	Citrate synthase OS=Setaria italica OX=4555 GN=101786364 PE=3 SV=1
278	340	tr|K3XGI8|K3XGI8_SETIT	46.9	4	2	2	2		57886	F-box domain-containing protein OS=Setaria italica OX=4555 GN=101762050 PE=4 SV=1
467	441	tr|K3Z9D7|K3Z9D7_SETIT	46.81	5	1	1	1		24920	Glutathione transferase OS=Setaria italica OX=4555 PE=3 SV=1
467	442	tr|A0A368QBD7|A0A368QBD7_SETIT	46.81	4	1	1	1		33534	Glutathione transferase OS=Setaria italica OX=4555 GN=SETIT_3G038500v2 PE=3 SV=1
467	467	tr|K3XLT1|K3XLT1_SETIT	46.81	5	1	1	1		24185	Glutathione transferase OS=Setaria italica OX=4555 GN=101771251 PE=3 SV=1
196	465	tr|K4A8P7|K4A8P7_SETIT	46.72	3	1	1	3		54914	Uncharacterized protein OS=Setaria italica OX=4555 GN=101776607 PE=3 SV=1
196	466	tr|A0A368SQH5|A0A368SQH5_SETIT	46.72	2	1	1	3		61635	Uncharacterized protein OS=Setaria italica OX=4555 GN=SETIT_9G388700v2 PE=3 SV=1
171	368	tr|K4ABP3|K4ABP3_SETIT	46.69	4	2	2	3		41283	UDP-arabinopyranose mutase OS=Setaria italica OX=4555 GN=101771463 PE=3 SV=1
622	470	tr|K3XKH5|K3XKH5_SETIT	46.67	3	1	1	1		31717	Uncharacterized protein OS=Setaria italica OX=4555 GN=101784061 PE=3 SV=1
138	308	tr|A0A368RJG8|A0A368RJG8_SETIT	46.64	2	3	3	4		153194	Uncharacterized protein OS=Setaria italica OX=4555 GN=SETIT_6G036800v2 PE=3 SV=1
138	309	tr|K3YFV3|K3YFV3_SETIT	46.64	2	3	3	4		159954	Uncharacterized protein OS=Setaria italica OX=4555 GN=SETIT_6G036800v2 PE=3 SV=1
192	349	tr|K3ZB53|K3ZB53_SETIT	46.61	22	3	3	3		10308	Thioredoxin domain-containing protein OS=Setaria italica OX=4555 GN=101776171 PE=4 SV=1
192	350	tr|K3ZAQ3|K3ZAQ3_SETIT	46.61	16	3	3	3		14095	Thioredoxin domain-containing protein OS=Setaria italica OX=4555 GN=101776171 PE=4 SV=1
193	372	tr|K3XZU1|K3XZU1_SETIT	46.61	15	3	3	3		15829	Uncharacterized protein OS=Setaria italica OX=4555 PE=4 SV=1
193	373	tr|A0A368QPF1|A0A368QPF1_SETIT	46.61	9	3	3	3		24186	PMEI domain-containing protein OS=Setaria italica OX=4555 GN=SETIT_4G007400v2 PE=4 SV=1
140	359	tr|K3XKU7|K3XKU7_SETIT	46.18	7	2	2	4		30208	Cytochrome c domain-containing protein OS=Setaria italica OX=4555 GN=101761267 PE=4 SV=1
140	360	tr|K3YIS4|K3YIS4_SETIT	46.18	6	2	2	4		33225	Cytochrome c domain-containing protein OS=Setaria italica OX=4555 GN=101771541 PE=4 SV=1
279	346	tr|K3Y5W4|K3Y5W4_SETIT	45.73	3	2	2	2		67890	2-isopropylmalate synthase OS=Setaria italica OX=4555 GN=101754154 PE=3 SV=1
187	235	tr|K3Y642|K3Y642_SETIT	45.18	4	3	3	3		61726	Dihydrolipoyl dehydrogenase OS=Setaria italica OX=4555 GN=101756978 PE=3 SV=1
277	332	tr|K3XVG0|K3XVG0_SETIT	45.13	3	2	2	2		85467	Uncharacterized protein OS=Setaria italica OX=4555 GN=101762449 PE=3 SV=1
286	613	tr|K3XV15|K3XV15_SETIT	45.11	1	2	2	2		110037	Tr-type G domain-containing protein OS=Setaria italica OX=4555 GN=101752842 PE=3 SV=1
276	319	tr|K3YSS1|K3YSS1_SETIT	44.95	4	2	2	2		45132	Succinate--CoA ligase [ADP-forming] subunit beta mitochondrial OS=Setaria italica OX=4555 GN=101772328 PE=3 SV=1
243	302	tr|K3XEP0|K3XEP0_SETIT	44.79	2	2	2	2		90433	Glutaminyl-tRNA synthetase OS=Setaria italica OX=4555 GN=101752866 PE=3 SV=1
623	475	tr|A0A368R6Y2|A0A368R6Y2_SETIT	44.28	4	1	1	1		45613	Carbamoyl-phosphate synthase (glutamine-hydrolyzing) OS=Setaria italica OX=4555 GN=SETIT_5G206000v2 PE=3 SV=1
623	476	tr|K3Y2U4|K3Y2U4_SETIT	44.28	2	1	1	1		84195	Uncharacterized protein OS=Setaria italica OX=4555 GN=SETIT_4G038300v2 PE=4 SV=1
623	477	tr|K3XS63|K3XS63_SETIT	44.28	1	1	1	1		122683	Carbamoyl-phosphate synthase (glutamine-hydrolyzing) OS=Setaria italica OX=4555 PE=3 SV=1
248	351	tr|K3XHM5|K3XHM5_SETIT	44.2	5	2	2	2		50054	Uncharacterized protein OS=Setaria italica OX=4555 PE=4 SV=1
248	352	tr|A0A368RD27|A0A368RD27_SETIT	44.2	5	2	2	2		52179	Uncharacterized protein OS=Setaria italica OX=4555 GN=SETIT_5G329600v2 PE=4 SV=1
624	478	tr|K3XYL7|K3XYL7_SETIT	44.18	6	1	1	1		31762	Eukaryotic translation initiation factor 3 subunit G OS=Setaria italica OX=4555 GN=101761219 PE=3 SV=1
326	391	tr|K3ZQJ4|K3ZQJ4_SETIT	44.15	1	1	1	1		98552	Coatomer subunit gamma OS=Setaria italica OX=4555 GN=101780598 PE=3 SV=1
251	446	tr|K3YS02|K3YS02_SETIT	43.98	2	1	1	2		52336	Acetohydroxy-acid synthase small subunit OS=Setaria italica OX=4555 PE=3 SV=1
251	447	tr|A0A368PNJ1|A0A368PNJ1_SETIT	43.98	2	1	1	2		52582	Acetohydroxy-acid synthase small subunit OS=Setaria italica OX=4555 GN=SETIT_1G227600v2 PE=3 SV=1
210	326	tr|K3XW27|K3XW27_SETIT	43.69	3	2	1	2		61921	Uncharacterized protein OS=Setaria italica OX=4555 GN=101756075 PE=3 SV=1
126	414	tr|K3Z681|K3Z681_SETIT	43.57	5	4	4	4		47898	Phosphopyruvate hydratase OS=Setaria italica OX=4555 GN=101781858 PE=3 SV=1
178	607	tr|K4AE14|K4AE14_SETIT	43.49	6	2	2	3		26230	Uncharacterized protein OS=Setaria italica OX=4555 GN=101784987 PE=3 SV=1
244	311	tr|K3Z982|K3Z982_SETIT	43.49	8	2	2	2		26062	Nucleoside diphosphate kinase OS=Setaria italica OX=4555 GN=101781699 PE=3 SV=1
627	489	tr|K3Z7K8|K3Z7K8_SETIT	42.18	3	1	1	1		38526	Uncharacterized protein OS=Setaria italica OX=4555 GN=101781183 PE=4 SV=1
281	482	tr|K3ZAI8|K3ZAI8_SETIT	41.97	14	1	1	2		15524	Uncharacterized protein OS=Setaria italica OX=4555 GN=101771583 PE=4 SV=1
626	487	tr|K4AGS8|K4AGS8_SETIT	41.83	8	1	1	1		12330	Uncharacterized protein OS=Setaria italica OX=4555 GN=101774720 PE=4 SV=1
626	488	tr|K4AGP2|K4AGP2_SETIT	41.83	8	1	1	1		12972	Uncharacterized protein OS=Setaria italica OX=4555 GN=101774720 PE=4 SV=1
625	483	tr|A0A0Q3PFM5|A0A0Q3PFM5_SETIT	41.82	16	1	1	1		8277	Uncharacterized protein OS=Setaria italica OX=4555 PE=4 SV=1
625	484	tr|A0A368R476|A0A368R476_SETIT	41.82	8	1	1	1		17712	SHSP domain-containing protein OS=Setaria italica OX=4555 GN=SETIT_5G131400v2 PE=3 SV=1
625	485	tr|A0A368R4L2|A0A368R4L2_SETIT	41.82	8	1	1	1		17786	SHSP domain-containing protein OS=Setaria italica OX=4555 GN=SETIT_5G131300v2 PE=3 SV=1
625	486	tr|K3XQ86|K3XQ86_SETIT	41.82	6	1	1	1		22216	SHSP domain-containing protein OS=Setaria italica OX=4555 PE=3 SV=1
465	425	tr|K3YZF1|K3YZF1_SETIT	41.59	5	1	1	1		32954	Uncharacterized protein OS=Setaria italica OX=4555 GN=101767480 PE=4 SV=1
628	493	tr|K3YKC6|K3YKC6_SETIT	41.56	11	1	1	1		11404	Uncharacterized protein OS=Setaria italica OX=4555 GN=101773836 PE=3 SV=1
628	494	tr|A0A368RVE1|A0A368RVE1_SETIT	41.56	11	1	1	1		11418	Uncharacterized protein OS=Setaria italica OX=4555 GN=SETIT_7G089200v2 PE=3 SV=1
247	345	tr|A0A368QGU8|A0A368QGU8_SETIT	41.41	5	2	2	2		36974	Proline iminopeptidase OS=Setaria italica OX=4555 GN=SETIT_3G181200v2 PE=3 SV=1
288	649	tr|K3XJV6|K3XJV6_SETIT	40.72	2	2	2	2		35769	Cysteine proteinase inhibitor OS=Setaria italica OX=4555 PE=3 SV=1
195	407	tr|K4ACX3|K4ACX3_SETIT	40.42	10	3	2	3		34513	Uncharacterized protein OS=Setaria italica OX=4555 GN=101769721 PE=3 SV=1
195	410	tr|K4ABE8|K4ABE8_SETIT	40.42	8	3	2	3		41512	Uncharacterized protein OS=Setaria italica OX=4555 GN=101769721 PE=3 SV=1
629	522	tr|K3ZXT3|K3ZXT3_SETIT	40.42	7	1	1	1		16756	UBC core domain-containing protein OS=Setaria italica OX=4555 GN=101752503 PE=4 SV=1
629	523	tr|K3YWG2|K3YWG2_SETIT	40.42	7	1	1	1		16720	UBC core domain-containing protein OS=Setaria italica OX=4555 GN=101785550 PE=4 SV=1
180	741	tr|K3Z3G2|K3Z3G2_SETIT	40.21	2	3	3	3		111714	Beta-galactosidase OS=Setaria italica OX=4555 PE=3 SV=1
246	339	tr|K3XXJ5|K3XXJ5_SETIT	40.11	5	2	2	2		40885	Uncharacterized protein OS=Setaria italica OX=4555 GN=101752850 PE=3 SV=1
630	529	tr|K3ZXL2|K3ZXL2_SETIT	40.11	6	1	1	1		18377	Nudix hydrolase domain-containing protein OS=Setaria italica OX=4555 GN=101763851 PE=4 SV=1
630	532	tr|K3ZXG3|K3ZXG3_SETIT	40.11	5	1	1	1		19426	Nudix hydrolase domain-containing protein OS=Setaria italica OX=4555 GN=101763851 PE=4 SV=1
630	533	tr|K4AFN3|K4AFN3_SETIT	40.11	5	1	1	1		20607	Nudix hydrolase domain-containing protein OS=Setaria italica OX=4555 GN=101759169 PE=4 SV=1
630	535	tr|A0A368SD08|A0A368SD08_SETIT	40.11	4	1	1	1		27785	Nudix hydrolase domain-containing protein OS=Setaria italica OX=4555 GN=SETIT_9G042200v2 PE=4 SV=1
468	454	tr|K3YH29|K3YH29_SETIT	40.09	2	1	1	1		56071	Malate dehydrogenase OS=Setaria italica OX=4555 GN=101771269 PE=3 SV=1
468	526	tr|A0A368RLZ2|A0A368RLZ2_SETIT	40.09	3	1	1	1		40898	Malate dehydrogenase OS=Setaria italica OX=4555 GN=SETIT_6G159300v2 PE=3 SV=1
468	527	tr|K3YI08|K3YI08_SETIT	40.09	3	1	1	1		41521	Malate dehydrogenase OS=Setaria italica OX=4555 GN=101771269 PE=3 SV=1
252	448	tr|K3Z766|K3Z766_SETIT	40.01	3	1	1	2		42445	Uncharacterized protein OS=Setaria italica OX=4555 GN=101767418 PE=3 SV=1
177	528	tr|A0A368QR82|A0A368QR82_SETIT	39.57	5	1	1	3		30639	Hydrophob_seed domain-containing protein OS=Setaria italica OX=4555 GN=SETIT_4G058700v2 PE=4 SV=1
172	374	tr|K3ZUC6|K3ZUC6_SETIT	39.48	7	3	3	3		39117	Uncharacterized protein OS=Setaria italica OX=4555 GN=101763044 PE=3 SV=1
164	342	tr|A0A368QA68|A0A368QA68_SETIT	39.25	5	2	2	3		43692	Uncharacterized protein OS=Setaria italica OX=4555 GN=SETIT_2G439000v2 PE=4 SV=1
164	343	tr|K4A231|K4A231_SETIT	39.25	5	2	2	3		48578	Uncharacterized protein OS=Setaria italica OX=4555 PE=4 SV=1
205	383	tr|K3Y4V3|K3Y4V3_SETIT	39.11	2	2	2	2	Deamidation (NQ)	118219	Importin N-terminal domain-containing protein OS=Setaria italica OX=4555 GN=101752763 PE=4 SV=1
205	392	tr|K3YPJ5|K3YPJ5_SETIT	39.11	2	2	2	2	Deamidation (NQ)	118545	Importin N-terminal domain-containing protein OS=Setaria italica OX=4555 GN=101783550 PE=4 SV=1
631	543	tr|A0A368SWC0|A0A368SWC0_SETIT	38.89	2	1	1	1		69757	Dolichyl-diphosphooligosaccharide--protein glycosyltransferase subunit 1 OS=Setaria italica OX=4555 GN=SETIT_9G555200v2 PE=3 SV=1
631	544	tr|K4A6F2|K4A6F2_SETIT	38.89	2	1	1	1		80312	Dolichyl-diphosphooligosaccharide--protein glycosyltransferase subunit 1 OS=Setaria italica OX=4555 PE=3 SV=1
280	384	tr|K3YJ85|K3YJ85_SETIT	38.71	6	2	2	2		29483	Glyoxalase I OS=Setaria italica OX=4555 GN=101777619 PE=3 SV=1
280	385	tr|A0A368RHW2|A0A368RHW2_SETIT	38.71	5	2	2	2		32487	Glyoxalase I OS=Setaria italica OX=4555 GN=SETIT_6G036100v2 PE=3 SV=1
283	548	tr|A0A368PPX7|A0A368PPX7_SETIT	38.71	19	1	1	2		12057	Uncharacterized protein OS=Setaria italica OX=4555 GN=SETIT_1G213700v2 PE=4 SV=1
633	551	tr|K3XJU1|K3XJU1_SETIT	38.65	3	1	1	1		36265	WD_REPEATS_REGION domain-containing protein OS=Setaria italica OX=4555 GN=101762321 PE=4 SV=1
632	549	tr|K3XMW0|K3XMW0_SETIT	38.47	6	1	1	1		16303	WHy domain-containing protein OS=Setaria italica OX=4555 GN=101755150 PE=3 SV=1
135	730	tr|K3XLG9|K3XLG9_SETIT	38.38	4	3	3	4		26287	Uncharacterized protein OS=Setaria italica OX=4555 GN=101776375 PE=3 SV=1
135	731	tr|A0A368RCL1|A0A368RCL1_SETIT	38.38	4	3	3	4		29675	Uncharacterized protein OS=Setaria italica OX=4555 GN=SETIT_5G355000v2 PE=3 SV=1
230	450	tr|K3YZR3|K3YZR3_SETIT	38.32	8	2	2	2		26974	Thioredoxin-dependent peroxiredoxin OS=Setaria italica OX=4555 PE=4 SV=1
230	463	tr|A0A368PMP8|A0A368PMP8_SETIT	38.32	8	2	2	2		28050	Thioredoxin-dependent peroxiredoxin OS=Setaria italica OX=4555 GN=SETIT_1G184000v2 PE=4 SV=1
130	382	tr|K3XVV2|K3XVV2_SETIT	37.85	4	3	3	4		66766	Auxin efflux carrier component OS=Setaria italica OX=4555 GN=101753110 PE=3 SV=1
229	395	tr|K3Y2J1|K3Y2J1_SETIT	37.78	2	1	1	2		68597	Asparagine synthetase [glutamine-hydrolyzing] OS=Setaria italica OX=4555 PE=4 SV=1
229	492	tr|K4A7H9|K4A7H9_SETIT	37.78	2	1	1	2		66038	Asparagine synthetase [glutamine-hydrolyzing] OS=Setaria italica OX=4555 GN=101764329 PE=4 SV=1
392	398	tr|K3XL58|K3XL58_SETIT	37.67	5	1	1	1		28919	3'-5' exonuclease domain-containing protein OS=Setaria italica OX=4555 GN=101766658 PE=4 SV=1
392	399	tr|K3XK09|K3XK09_SETIT	37.67	4	1	1	1		36299	Uncharacterized protein OS=Setaria italica OX=4555 GN=101766658 PE=4 SV=1
392	400	tr|K3XJR3|K3XJR3_SETIT	37.67	4	1	1	1		37545	Uncharacterized protein OS=Setaria italica OX=4555 GN=101766658 PE=4 SV=1
634	555	tr|K3ZRM4|K3ZRM4_SETIT	37.43	2	1	1	1		67582	Uncharacterized protein OS=Setaria italica OX=4555 GN=101762781 PE=4 SV=1
290	692	tr|K3ZJ51|K3ZJ51_SETIT	36.94	2	2	2	2		38165	1-acylglycerol-3-phosphate O-acyltransferase OS=Setaria italica OX=4555 GN=101764153 PE=3 SV=1
466	428	tr|K3YZS7|K3YZS7_SETIT	36.43	7	1	1	1		17970	Histone domain-containing protein OS=Setaria italica OX=4555 PE=3 SV=1
466	436	tr|K3YDA1|K3YDA1_SETIT	36.43	5	1	1	1		28147	Histone domain-containing protein OS=Setaria italica OX=4555 PE=3 SV=1
466	480	tr|A0A368RDN9|A0A368RDN9_SETIT	36.43	4	1	1	1		36058	Uncharacterized protein OS=Setaria italica OX=4555 GN=SETIT_5G393100v2 PE=3 SV=1
466	481	tr|K3XSA9|K3XSA9_SETIT	36.43	3	1	1	1		40079	Uncharacterized protein OS=Setaria italica OX=4555 PE=3 SV=1
466	496	tr|K3YE80|K3YE80_SETIT	36.43	6	1	1	1		20628	Histone domain-containing protein OS=Setaria italica OX=4555 PE=3 SV=1
466	559	tr|K3ZAN5|K3ZAN5_SETIT	36.43	9	1	1	1		15268	Histone H3 OS=Setaria italica OX=4555 GN=101782969 PE=3 SV=1
469	524	tr|K3XFD3|K3XFD3_SETIT	36.31	2	1	1	1		72685	AMP-binding domain-containing protein OS=Setaria italica OX=4555 GN=101773679 PE=4 SV=1
469	560	tr|A0A368R8G8|A0A368R8G8_SETIT	36.31	2	1	1	1		75354	AMP-binding domain-containing protein OS=Setaria italica OX=4555 GN=SETIT_5G248800v2 PE=4 SV=1
635	561	tr|K3ZJI5|K3ZJI5_SETIT	36.21	6	1	1	1		31068	Alba domain-containing protein OS=Setaria italica OX=4555 GN=101752944 PE=4 SV=1
637	566	tr|K3YVY0|K3YVY0_SETIT	35.96	5	1	1	1		19661	PLAT domain-containing protein OS=Setaria italica OX=4555 GN=101782465 PE=4 SV=1
636	562	tr|K3YS75|K3YS75_SETIT	35.91	2	1	1	1		50639	Elongation factor Tu OS=Setaria italica OX=4555 GN=101772187 PE=3 SV=1
342	420	tr|K4A796|K4A796_SETIT	35.88	1	1	1	1		67848	Leuk-A4-hydro_C domain-containing protein OS=Setaria italica OX=4555 GN=101770400 PE=3 SV=1
256	779	tr|K3ZCJ8|K3ZCJ8_SETIT	35.87	3	2	2	2		30649	MPN domain-containing protein OS=Setaria italica OX=4555 GN=SETIT_3G026200v2 PE=3 SV=1
396	460	tr|K3YJB9|K3YJB9_SETIT	35.79	4	1	1	1		27261	Proteasome subunit alpha type OS=Setaria italica OX=4555 GN=101753039 PE=3 SV=1
396	461	tr|K3ZWD4|K3ZWD4_SETIT	35.79	4	1	1	1		27213	Proteasome subunit alpha type OS=Setaria italica OX=4555 GN=101780216 PE=3 SV=1
396	462	tr|A0A368RPQ6|A0A368RPQ6_SETIT	35.79	3	1	1	1		36718	PROTEASOME_ALPHA_1 domain-containing protein OS=Setaria italica OX=4555 GN=SETIT_6G239500v2 PE=3 SV=1
291	718	tr|K3YSW5|K3YSW5_SETIT	35.76	2	2	2	2		43391	Glyceraldehyde-3-phosphate dehydrogenase OS=Setaria italica OX=4555 GN=101753287 PE=3 SV=1
395	437	tr|A0A368PP28|A0A368PP28_SETIT	35.68	3	1	1	1		41358	Uncharacterized protein OS=Setaria italica OX=4555 GN=SETIT_1G252200v2 PE=3 SV=1
395	438	tr|K3YRX2|K3YRX2_SETIT	35.68	2	1	1	1		54432	Uncharacterized protein OS=Setaria italica OX=4555 GN=101758290 PE=3 SV=1
204	380	tr|A0A368S4M3|A0A368S4M3_SETIT	35.66	2	2	2	2		116164	Protein kinase domain-containing protein OS=Setaria italica OX=4555 GN=SETIT_8G050400v2 PE=3 SV=1
201	417	tr|K3XUZ6|K3XUZ6_SETIT	35.66	3	2	2	2	Deamidation (NQ)	116392	Auxin response factor OS=Setaria italica OX=4555 GN=101783358 PE=3 SV=1
470	556	tr|A0A368PI76|A0A368PI76_SETIT	35.45	2	1	1	1		55087	Citrate synthase OS=Setaria italica OX=4555 GN=SETIT_1G026100v2 PE=3 SV=1
470	557	tr|K3YR77|K3YR77_SETIT	35.45	2	1	1	1		63096	Citrate synthase OS=Setaria italica OX=4555 PE=3 SV=1
393	403	tr|K3YUJ4|K3YUJ4_SETIT	35.28	3	1	1	1		31240	Thiolase_N domain-containing protein OS=Setaria italica OX=4555 GN=101777905 PE=4 SV=1
393	404	tr|K3YT25|K3YT25_SETIT	35.28	3	1	1	1		41517	Uncharacterized protein OS=Setaria italica OX=4555 GN=101777905 PE=3 SV=1
393	405	tr|K3YSA7|K3YSA7_SETIT	35.28	2	1	1	1		48162	Uncharacterized protein OS=Setaria italica OX=4555 GN=101777905 PE=3 SV=1
393	406	tr|K3YSA3|K3YSA3_SETIT	35.28	2	1	1	1		48318	Uncharacterized protein OS=Setaria italica OX=4555 GN=101777905 PE=3 SV=1
122	722	tr|K3ZET4|K3ZET4_SETIT	35.14	1	1	1	5	Acetylation (Protein N-term)	79998	LRRNT_2 domain-containing protein OS=Setaria italica OX=4555 PE=4 SV=1
638	571	tr|K3YX48|K3YX48_SETIT	35.13	11	1	1	1		10743	Uncharacterized protein OS=Setaria italica OX=4555 GN=101775975 PE=4 SV=1
477	606	tr|K3YGU0|K3YGU0_SETIT	34.8	1	1	1	1		63632	Uncharacterized protein OS=Setaria italica OX=4555 GN=101783283 PE=3 SV=1
639	584	tr|A0A368RLM6|A0A368RLM6_SETIT	34.8	5	1	1	1		20874	Uncharacterized protein OS=Setaria italica OX=4555 GN=SETIT_6G146200v2 PE=4 SV=1
287	624	tr|A0A368PX53|A0A368PX53_SETIT	34.75	3	2	0	2		55338	Glucose-1-phosphate adenylyltransferase OS=Setaria italica OX=4555 GN=SETIT_2G094900v2 PE=3 SV=1
254	642	tr|K3ZRD0|K3ZRD0_SETIT	34.63	3	2	2	2		70124	Formyltetrahydrofolate synthetase OS=Setaria italica OX=4555 GN=101775060 PE=4 SV=1
254	644	tr|K3ZR21|K3ZR21_SETIT	34.63	3	2	2	2		78377	Formyltetrahydrofolate synthetase OS=Setaria italica OX=4555 GN=101775060 PE=3 SV=1
640	585	tr|Q7XBG4|Q7XBG4_SETIT	34.51	9	1	1	1		11705	AAI domain-containing protein OS=Setaria italica OX=4555 GN=101756926 PE=2 SV=1
475	588	tr|K3Z9A6|K3Z9A6_SETIT	34.31	3	1	1	1		25311	Superoxide dismutase OS=Setaria italica OX=4555 GN=101756329 PE=3 SV=1
641	591	tr|A0A368RG07|A0A368RG07_SETIT	33.84	3	1	1	1		46654	OMPdecase OS=Setaria italica OX=4555 GN=SETIT_5G454100v2 PE=3 SV=1
258	830	tr|K3ZVZ2|K3ZVZ2_SETIT	33.62	3	2	1	2		30414	Uncharacterized protein OS=Setaria italica OX=4555 GN=101769280 PE=4 SV=1
642	600	tr|K3Y6X7|K3Y6X7_SETIT	33.57	2	1	1	1		51580	Uncharacterized protein OS=Setaria italica OX=4555 GN=101755616 PE=4 SV=1
473	577	tr|K3XWD0|K3XWD0_SETIT	33.53	2	1	1	1		57290	V-ATPase 69 kDa subunit OS=Setaria italica OX=4555 PE=3 SV=1
473	578	tr|A0A368QVV0|A0A368QVV0_SETIT	33.53	2	1	1	1		68115	V-ATPase 69 kDa subunit OS=Setaria italica OX=4555 GN=SETIT_4G187500v2 PE=3 SV=1
218	627	tr|K3ZH02|K3ZH02_SETIT	33.51	2	2	2	2		115687	Uncharacterized protein OS=Setaria italica OX=4555 GN=SETIT_8G120000v2 PE=4 SV=1
285	597	tr|K3XMS2|K3XMS2_SETIT	33.46	7	1	1	2		17940	EXPERA domain-containing protein OS=Setaria italica OX=4555 GN=101764347 PE=3 SV=1
285	598	tr|K3XLW4|K3XLW4_SETIT	33.46	5	1	1	2		24450	EXPERA domain-containing protein OS=Setaria italica OX=4555 GN=101767473 PE=3 SV=1
285	599	tr|K3XLW7|K3XLW7_SETIT	33.46	5	1	1	2		24091	EXPERA domain-containing protein OS=Setaria italica OX=4555 GN=101764347 PE=3 SV=1
289	657	tr|K4A798|K4A798_SETIT	33.38	2	2	2	2		65141	Pyruvate decarboxylase OS=Setaria italica OX=4555 GN=101776753 PE=3 SV=1
214	732	tr|K4ALB5|K4ALB5_SETIT	33.32	1	2	2	2		141170	ZnF_PMZ domain-containing protein OS=Setaria italica OX=4555 PE=4 SV=1
197	603	tr|K3ZKC4|K3ZKC4_SETIT	33.08	10	1	1	3		11993	Uncharacterized protein OS=Setaria italica OX=4555 GN=101774678 PE=3 SV=1
197	604	tr|K3ZKB2|K3ZKB2_SETIT	33.08	9	1	1	3		12739	Uncharacterized protein OS=Setaria italica OX=4555 GN=101774678 PE=3 SV=1
471	572	tr|A0A368QK83|A0A368QK83_SETIT	32.97	2	1	1	1		49756	Guanosine nucleotide diphosphate dissociation inhibitor OS=Setaria italica OX=4555 GN=SETIT_3G239600v2 PE=3 SV=1
471	573	tr|K3ZEL1|K3ZEL1_SETIT	32.97	2	1	1	1		53453	Guanosine nucleotide diphosphate dissociation inhibitor OS=Setaria italica OX=4555 PE=3 SV=1
474	579	tr|K3Y7C2|K3Y7C2_SETIT	32.29	2	1	1	1		48729	Dihydrolipoyllysine-residue succinyltransferase OS=Setaria italica OX=4555 GN=101780606 PE=3 SV=1
474	580	tr|K3Y7B7|K3Y7B7_SETIT	32.29	2	1	1	1		48702	Dihydrolipoyllysine-residue succinyltransferase OS=Setaria italica OX=4555 GN=101780606 PE=3 SV=1
474	581	tr|K3Y7B0|K3Y7B0_SETIT	32.29	2	1	1	1		48858	Dihydrolipoyllysine-residue succinyltransferase OS=Setaria italica OX=4555 GN=101780606 PE=3 SV=1
232	735	tr|K4AAQ4|K4AAQ4_SETIT	32.22	3	2	2	2		44313	Ribos_L4_asso_C domain-containing protein OS=Setaria italica OX=4555 GN=101769860 PE=3 SV=1
643	609	tr|K3XN29|K3XN29_SETIT	32.12	9	1	1	1		15085	Uncharacterized protein OS=Setaria italica OX=4555 GN=101778285 PE=4 SV=1
397	474	tr|K3ZRG0|K3ZRG0_SETIT	32.11	1	1	1	1		72989	Uncharacterized protein OS=Setaria italica OX=4555 GN=101785048 PE=3 SV=1
397	541	tr|A0A368Q7E6|A0A368Q7E6_SETIT	32.11	1	1	1	1		93401	Uncharacterized protein OS=Setaria italica OX=4555 GN=SETIT_2G385500v2 PE=3 SV=1
397	542	tr|A0A368Q7D2|A0A368Q7D2_SETIT	32.11	1	1	1	1		93529	Uncharacterized protein OS=Setaria italica OX=4555 GN=SETIT_2G385500v2 PE=3 SV=1
645	614	tr|K3YHE4|K3YHE4_SETIT	31.97	2	1	1	1		52928	UDP-glucose 6-dehydrogenase OS=Setaria italica OX=4555 GN=101780186 PE=3 SV=1
645	615	tr|K4A999|K4A999_SETIT	31.97	2	1	1	1		52884	UDP-glucose 6-dehydrogenase OS=Setaria italica OX=4555 GN=101774039 PE=3 SV=1
158	753	tr|K3YT51|K3YT51_SETIT	31.83	6	2	2	3		43779	Fumarylacetoacetase OS=Setaria italica OX=4555 GN=101777884 PE=3 SV=1
158	754	tr|K3YSP9|K3YSP9_SETIT	31.83	5	2	2	3		46543	Fumarylacetoacetase OS=Setaria italica OX=4555 GN=101777884 PE=3 SV=1
644	610	tr|A0A368SAP4|A0A368SAP4_SETIT	31.8	8	1	1	1		18901	TCTP domain-containing protein OS=Setaria italica OX=4555 GN=SETIT_8G222800v2 PE=3 SV=1
644	611	tr|K3ZJT6|K3ZJT6_SETIT	31.8	6	1	1	1		23588	TCTP domain-containing protein OS=Setaria italica OX=4555 PE=3 SV=1
644	612	tr|K3ZJL8|K3ZJL8_SETIT	31.8	5	1	1	1		27878	TCTP domain-containing protein OS=Setaria italica OX=4555 PE=3 SV=1
472	574	tr|K3XH46|K3XH46_SETIT	31.71	2	1	1	1		54184	Aspartyl-tRNA synthetase OS=Setaria italica OX=4555 PE=3 SV=1
472	575	tr|A0A368R027|A0A368R027_SETIT	31.71	2	1	1	1		60778	Aspartyl-tRNA synthetase OS=Setaria italica OX=4555 GN=SETIT_5G014900v2 PE=3 SV=1
472	576	tr|K3XFV8|K3XFV8_SETIT	31.71	2	1	1	1		65792	Aspartate--tRNA ligase OS=Setaria italica OX=4555 PE=3 SV=1
472	616	tr|A0A368PZI6|A0A368PZI6_SETIT	31.71	2	1	1	1		55853	Aspartate--tRNA ligase OS=Setaria italica OX=4555 GN=SETIT_2G141600v2 PE=3 SV=1
472	617	tr|K4A2J6|K4A2J6_SETIT	31.71	2	1	1	1		56164	Aspartate--tRNA ligase OS=Setaria italica OX=4555 PE=3 SV=1
221	789	tr|K3XIX4|K3XIX4_SETIT	31.58	2	2	2	2		43781	Rab-GAP TBC domain-containing protein OS=Setaria italica OX=4555 GN=101782850 PE=4 SV=1
398	520	tr|K3ZQQ1|K3ZQQ1_SETIT	31.54	1	1	1	1		92489	Protein kinase domain-containing protein OS=Setaria italica OX=4555 PE=4 SV=1
398	521	tr|A0A368PVH8|A0A368PVH8_SETIT	31.54	1	1	1	1		93045	Protein kinase domain-containing protein OS=Setaria italica OX=4555 GN=SETIT_2G030500v2 PE=4 SV=1
231	728	tr|K4ACA6|K4ACA6_SETIT	31.45	5	2	2	2		36367	Uncharacterized protein OS=Setaria italica OX=4555 GN=101771345 PE=4 SV=1
343	471	tr|A0A368R6N8|A0A368R6N8_SETIT	31.44	5	1	1	1		22477	Uncharacterized protein OS=Setaria italica OX=4555 GN=SETIT_5G199400v2 PE=4 SV=1
343	472	tr|K3XJB9|K3XJB9_SETIT	31.44	3	1	1	1		39395	Uncharacterized protein OS=Setaria italica OX=4555 PE=4 SV=1
343	589	tr|K3YUH6|K3YUH6_SETIT	31.44	4	1	1	1		33724	Uncharacterized protein OS=Setaria italica OX=4555 PE=4 SV=1
343	590	tr|K3ZWV4|K3ZWV4_SETIT	31.44	5	1	1	1		24055	Uncharacterized protein OS=Setaria italica OX=4555 GN=101771278 PE=4 SV=1
343	593	tr|K3XJY6|K3XJY6_SETIT	31.44	3	1	1	1		36319	Uncharacterized protein OS=Setaria italica OX=4555 PE=4 SV=1
343	595	tr|K3XLW2|K3XLW2_SETIT	31.44	5	1	1	1		23807	Uncharacterized protein OS=Setaria italica OX=4555 GN=101785671 PE=4 SV=1
343	596	tr|K3Z9K2|K3Z9K2_SETIT	31.44	5	1	1	1		23798	Uncharacterized protein OS=Setaria italica OX=4555 GN=101780246 PE=4 SV=1
343	618	tr|K3ZX06|K3ZX06_SETIT	31.44	5	1	1	1		22505	Uncharacterized protein OS=Setaria italica OX=4555 GN=101786393 PE=4 SV=1
343	619	tr|A0A368PP76|A0A368PP76_SETIT	31.44	5	1	1	1		22477	Uncharacterized protein OS=Setaria italica OX=4555 GN=SETIT_1G256700v2 PE=4 SV=1
343	620	tr|K4AF16|K4AF16_SETIT	31.44	5	1	1	1		23923	Uncharacterized protein OS=Setaria italica OX=4555 GN=101767699 PE=4 SV=1
343	621	tr|K3Z9I7|K3Z9I7_SETIT	31.44	5	1	1	1		23910	Uncharacterized protein OS=Setaria italica OX=4555 GN=101776568 PE=4 SV=1
476	592	tr|K4A6W3|K4A6W3_SETIT	31.26	2	1	1	1		71756	Mitochondrial Rho GTPase OS=Setaria italica OX=4555 GN=101758072 PE=3 SV=1
321	412	tr|A0A368Q0K3|A0A368Q0K3_SETIT	31.26	2	1	1	1		78507	Uncharacterized protein OS=Setaria italica OX=4555 GN=SETIT_2G193500v2 PE=3 SV=1
321	464	tr|K3ZRR8|K3ZRR8_SETIT	31.26	3	1	1	1		64013	Uncharacterized protein OS=Setaria italica OX=4555 PE=3 SV=1
295	774	tr|K3YIK4|K3YIK4_SETIT	31.06	7	2	2	2		35155	Probable 6-phosphogluconolactonase OS=Setaria italica OX=4555 GN=101779406 PE=3 SV=1
262	900	tr|A0A368PM10|A0A368PM10_SETIT	30.59	10	2	2	2		9891	Uncharacterized protein OS=Setaria italica OX=4555 GN=SETIT_1G170800v2 PE=4 SV=1
479	630	tr|A0A368QGE0|A0A368QGE0_SETIT	30.54	2	1	1	1		57115	Assimilatory sulfite reductase (ferredoxin) OS=Setaria italica OX=4555 GN=SETIT_3G187400v2 PE=3 SV=1
479	631	tr|A0A368QGW4|A0A368QGW4_SETIT	30.54	1	1	1	1		70076	Assimilatory sulfite reductase (ferredoxin) OS=Setaria italica OX=4555 GN=SETIT_3G187400v2 PE=3 SV=1
479	632	tr|K3Z3K7|K3Z3K7_SETIT	30.54	1	1	1	1		102716	Assimilatory sulfite reductase (ferredoxin) OS=Setaria italica OX=4555 PE=3 SV=1
479	633	tr|K3Z3K0|K3Z3K0_SETIT	30.54	1	1	1	1		103326	Assimilatory sulfite reductase (ferredoxin) OS=Setaria italica OX=4555 PE=3 SV=1
149	742	tr|K3YFV8|K3YFV8_SETIT	30.45	2	2	2	3		145391	KIX_2 domain-containing protein OS=Setaria italica OX=4555 GN=101765596 PE=4 SV=1
149	743	tr|K3YFV7|K3YFV7_SETIT	30.45	2	2	2	3		145478	KIX_2 domain-containing protein OS=Setaria italica OX=4555 GN=101765596 PE=4 SV=1
259	831	tr|K3ZRM7|K3ZRM7_SETIT	30.33	3	2	1	2	Deamidation (NQ)	66547	Starch synthase chloroplastic/amyloplastic OS=Setaria italica OX=4555 GN=101786779 PE=3 SV=1
647	638	tr|K3ZAB3|K3ZAB3_SETIT	30.02	5	1	1	1		17812	Usp domain-containing protein OS=Setaria italica OX=4555 GN=101767558 PE=4 SV=1
296	816	tr|A0A368STP4|A0A368STP4_SETIT	29.78	4	2	2	2	Deamidation (NQ)	33182	BHLH domain-containing protein OS=Setaria italica OX=4555 GN=SETIT_9G482300v2 PE=3 SV=1
648	639	tr|K3ZX60|K3ZX60_SETIT	29.75	6	1	1	1		20754	L-ascorbate peroxidase OS=Setaria italica OX=4555 GN=101754668 PE=3 SV=1
648	640	tr|K3ZWN5|K3ZWN5_SETIT	29.75	5	1	1	1		24894	L-ascorbate peroxidase OS=Setaria italica OX=4555 GN=101754668 PE=3 SV=1
648	641	tr|K3ZWD0|K3ZWD0_SETIT	29.75	4	1	1	1		27161	L-ascorbate peroxidase OS=Setaria italica OX=4555 GN=101754668 PE=3 SV=1
233	807	tr|K3Z321|K3Z321_SETIT	29.61	0	2	2	2		402475	HECT-type E3 ubiquitin transferase OS=Setaria italica OX=4555 GN=101778904 PE=4 SV=1
651	687	tr|A0A368Q5K6|A0A368Q5K6_SETIT	29.43	2	1	1	1		35071	PAP_fibrillin domain-containing protein OS=Setaria italica OX=4555 GN=SETIT_2G310100v2 PE=4 SV=1
651	689	tr|A0A368Q4M3|A0A368Q4M3_SETIT	29.43	2	1	1	1		42305	PAP_fibrillin domain-containing protein OS=Setaria italica OX=4555 GN=SETIT_2G310100v2 PE=4 SV=1
651	690	tr|K3ZTT9|K3ZTT9_SETIT	29.43	2	1	1	1		44836	PAP_fibrillin domain-containing protein OS=Setaria italica OX=4555 PE=4 SV=1
480	650	tr|K3Y2W0|K3Y2W0_SETIT	29.33	2	1	1	1		50854	Abhydrolase_3 domain-containing protein OS=Setaria italica OX=4555 GN=101768926 PE=4 SV=1
480	651	tr|K3XXP6|K3XXP6_SETIT	29.33	2	1	1	1		39810	Abhydrolase_3 domain-containing protein OS=Setaria italica OX=4555 GN=101767040 PE=4 SV=1
480	653	tr|K3ZVG8|K3ZVG8_SETIT	29.33	3	1	1	1		32974	Abhydrolase_3 domain-containing protein OS=Setaria italica OX=4555 GN=101769546 PE=3 SV=1
480	655	tr|A0A368PKZ6|A0A368PKZ6_SETIT	29.33	3	1	1	1		35660	Abhydrolase_3 domain-containing protein OS=Setaria italica OX=4555 GN=SETIT_1G154500v2 PE=4 SV=1
480	658	tr|A0A368QQP2|A0A368QQP2_SETIT	29.33	3	1	1	1		29372	Abhydrolase_3 domain-containing protein OS=Setaria italica OX=4555 GN=SETIT_4G044100v2 PE=3 SV=1
480	659	tr|K3ZZC0|K3ZZC0_SETIT	29.33	3	1	1	1		32117	Abhydrolase_3 domain-containing protein OS=Setaria italica OX=4555 GN=SETIT_2G233200v2 PE=4 SV=1
480	660	tr|K3YN14|K3YN14_SETIT	29.33	3	1	1	1		32765	Abhydrolase_3 domain-containing protein OS=Setaria italica OX=4555 PE=3 SV=1
480	661	tr|K4A1Y8|K4A1Y8_SETIT	29.33	3	1	1	1		33937	Abhydrolase_3 domain-containing protein OS=Setaria italica OX=4555 PE=4 SV=1
480	662	tr|K3ZVB8|K3ZVB8_SETIT	29.33	3	1	1	1		34423	Abhydrolase_3 domain-containing protein OS=Setaria italica OX=4555 GN=101757371 PE=4 SV=1
480	663	tr|A0A368Q1U9|A0A368Q1U9_SETIT	29.33	3	1	1	1		34343	Abhydrolase_3 domain-containing protein OS=Setaria italica OX=4555 GN=SETIT_2G233100v2 PE=4 SV=1
480	664	tr|K4A2K1|K4A2K1_SETIT	29.33	3	1	1	1		34235	Abhydrolase_3 domain-containing protein OS=Setaria italica OX=4555 PE=4 SV=1
480	665	tr|A0A368QSA7|A0A368QSA7_SETIT	29.33	3	1	1	1		34607	Abhydrolase_3 domain-containing protein OS=Setaria italica OX=4555 GN=SETIT_4G079200v2 PE=4 SV=1
480	666	tr|A0A368Q2J1|A0A368Q2J1_SETIT	29.33	3	1	1	1		34581	Abhydrolase_3 domain-containing protein OS=Setaria italica OX=4555 GN=SETIT_2G233700v2 PE=4 SV=1
480	667	tr|K3Y8P2|K3Y8P2_SETIT	29.33	3	1	1	1		34900	Abhydrolase_3 domain-containing protein OS=Setaria italica OX=4555 GN=101757239 PE=4 SV=1
480	668	tr|K3YN41|K3YN41_SETIT	29.33	3	1	1	1		34888	Abhydrolase_3 domain-containing protein OS=Setaria italica OX=4555 GN=101770880 PE=3 SV=1
480	669	tr|A0A368Q213|A0A368Q213_SETIT	29.33	3	1	1	1		34931	Abhydrolase_3 domain-containing protein OS=Setaria italica OX=4555 GN=SETIT_2G229000v2 PE=4 SV=1
480	670	tr|A0A368RMR2|A0A368RMR2_SETIT	29.33	3	1	1	1		37410	Abhydrolase_3 domain-containing protein OS=Setaria italica OX=4555 GN=SETIT_6G182500v2 PE=3 SV=1
480	671	tr|K3YIB5|K3YIB5_SETIT	29.33	2	1	1	1		38012	Abhydrolase_3 domain-containing protein OS=Setaria italica OX=4555 GN=101771271 PE=4 SV=1
480	672	tr|K3ZUB2|K3ZUB2_SETIT	29.33	2	1	1	1		40621	Abhydrolase_3 domain-containing protein OS=Setaria italica OX=4555 PE=4 SV=1
480	673	tr|K3ZU99|K3ZU99_SETIT	29.33	2	1	1	1		40782	Abhydrolase_3 domain-containing protein OS=Setaria italica OX=4555 GN=101769953 PE=3 SV=1
649	676	tr|K3Y317|K3Y317_SETIT	29.04	14	1	1	1		6784	Glucose-6-phosphate dehydrogenase (NADP(+)) OS=Setaria italica OX=4555 GN=SETIT_4G038800v2 PE=3 SV=1
649	683	tr|K3YS30|K3YS30_SETIT	29.04	2	1	1	1		54608	Glucose-6-phosphate 1-dehydrogenase OS=Setaria italica OX=4555 GN=101783950 PE=3 SV=1
649	684	tr|K3Y6P7|K3Y6P7_SETIT	29.04	2	1	1	1		57796	Glucose-6-phosphate 1-dehydrogenase OS=Setaria italica OX=4555 GN=101771022 PE=3 SV=1
649	685	tr|K3Y6Q1|K3Y6Q1_SETIT	29.04	2	1	1	1		56773	Glucose-6-phosphate 1-dehydrogenase OS=Setaria italica OX=4555 GN=101778188 PE=3 SV=1
649	686	tr|K3YRN6|K3YRN6_SETIT	29.04	2	1	1	1		58819	Glucose-6-phosphate 1-dehydrogenase OS=Setaria italica OX=4555 GN=101783950 PE=3 SV=1
649	688	tr|K3Y627|K3Y627_SETIT	29.04	1	1	1	1		66598	Glucose-6-phosphate 1-dehydrogenase OS=Setaria italica OX=4555 GN=101778188 PE=3 SV=1
650	678	tr|K3ZK31|K3ZK31_SETIT	29.01	5	1	1	1		16595	V-type proton ATPase proteolipid subunit OS=Setaria italica OX=4555 GN=101761445 PE=3 SV=1
650	679	tr|A0A368QC72|A0A368QC72_SETIT	29.01	5	1	1	1		16690	V-type proton ATPase proteolipid subunit OS=Setaria italica OX=4555 GN=SETIT_3G068300v2 PE=3 SV=1
650	680	tr|K3YEI2|K3YEI2_SETIT	29.01	4	1	1	1		24662	V-type proton ATPase proteolipid subunit OS=Setaria italica OX=4555 GN=SETIT_7G285900v2 PE=3 SV=1
166	695	tr|K3ZZV2|K3ZZV2_SETIT	28.53	4	1	1	3	Deamidation (NQ)	25963	Uncharacterized protein OS=Setaria italica OX=4555 PE=4 SV=1
652	696	tr|K3Z6C1|K3Z6C1_SETIT	28.36	2	1	1	1		47528	Non-specific serine/threonine protein kinase OS=Setaria italica OX=4555 GN=101769723 PE=3 SV=1
655	716	tr|A0A368SLN6|A0A368SLN6_SETIT	28.17	5	1	1	1		13193	Uncharacterized protein OS=Setaria italica OX=4555 GN=SETIT_9G285900v2 PE=4 SV=1
487	770	tr|K3XQU2|K3XQU2_SETIT	28.14	1	1	1	1		105978	LRRNT_2 domain-containing protein OS=Setaria italica OX=4555 PE=4 SV=1
654	712	tr|K4AA57|K4AA57_SETIT	27.82	2	1	1	1		48353	Tubulin alpha chain OS=Setaria italica OX=4555 GN=101761206 PE=3 SV=1
654	713	tr|K4A9X4|K4A9X4_SETIT	27.82	2	1	1	1		49856	Tubulin alpha chain OS=Setaria italica OX=4555 GN=101763383 PE=3 SV=1
654	714	tr|K3ZT92|K3ZT92_SETIT	27.82	2	1	1	1		49573	Tubulin alpha chain OS=Setaria italica OX=4555 GN=101753745 PE=3 SV=1
654	715	tr|K4A9U8|K4A9U8_SETIT	27.82	2	1	1	1		49717	Tubulin alpha chain OS=Setaria italica OX=4555 GN=101761206 PE=3 SV=1
653	710	tr|K3ZW14|K3ZW14_SETIT	27.58	3	1	1	1		29711	Uncharacterized protein OS=Setaria italica OX=4555 GN=SETIT_2G292500v2 PE=4 SV=1
653	711	tr|K3ZVU1|K3ZVU1_SETIT	27.58	3	1	1	1		30950	Thioredoxin-like_fold domain-containing protein OS=Setaria italica OX=4555 GN=SETIT_2G292500v2 PE=4 SV=1
399	697	tr|K3ZQ51|K3ZQ51_SETIT	27.08	1	1	1	1		129365	WD_REPEATS_REGION domain-containing protein OS=Setaria italica OX=4555 PE=3 SV=1
399	698	tr|K3ZQ50|K3ZQ50_SETIT	27.08	1	1	1	1		129494	WD_REPEATS_REGION domain-containing protein OS=Setaria italica OX=4555 PE=3 SV=1
657	727	tr|K3ZAM7|K3ZAM7_SETIT	26.83	8	1	1	1		14843	Inhibitor I9 domain-containing protein OS=Setaria italica OX=4555 GN=101765515 PE=4 SV=1
500	856	tr|A0A368R3U8|A0A368R3U8_SETIT	26.61	1	1	1	1		40787	Uncharacterized protein OS=Setaria italica OX=4555 GN=SETIT_5G121200v2 PE=4 SV=1
500	931	tr|K3Z4H4|K3Z4H4_SETIT	26.61	1	1	1	1		68096	BZIP domain-containing protein OS=Setaria italica OX=4555 GN=101778763 PE=4 SV=1
267	1076	tr|K3XIQ0|K3XIQ0_SETIT	26.44	4	2	2	2		43715	Epimerase domain-containing protein OS=Setaria italica OX=4555 GN=101759361 PE=4 SV=1
293	756	tr|K3Y7R0|K3Y7R0_SETIT	26.25	2	1	1	2		44379	Uncharacterized protein OS=Setaria italica OX=4555 GN=101781952 PE=3 SV=1
294	757	tr|K3YW80|K3YW80_SETIT	26.16	5	1	1	2		17719	Uncharacterized protein OS=Setaria italica OX=4555 GN=101786514 PE=3 SV=1
485	747	tr|K3XSN2|K3XSN2_SETIT	26.01	2	1	1	1		43405	Uncharacterized protein OS=Setaria italica OX=4555 PE=4 SV=1
485	748	tr|A0A368R7I1|A0A368R7I1_SETIT	26.01	2	1	1	1		47572	Uncharacterized protein OS=Setaria italica OX=4555 GN=SETIT_5G222600v2 PE=4 SV=1
485	749	tr|A0A368R996|A0A368R996_SETIT	26.01	2	1	1	1		45119	Uncharacterized protein OS=Setaria italica OX=4555 GN=SETIT_5G222500v2 PE=4 SV=1
485	750	tr|K3XSK8|K3XSK8_SETIT	26.01	2	1	1	1		46249	Uncharacterized protein OS=Setaria italica OX=4555 PE=4 SV=1
661	764	tr|A0A368Q3E2|A0A368Q3E2_SETIT	25.92	2	1	1	1		45271	AB hydrolase-1 domain-containing protein OS=Setaria italica OX=4555 GN=SETIT_2G277900v2 PE=4 SV=1
224	1011	tr|K3ZPV6|K3ZPV6_SETIT	25.92	0	2	2	2		432301	Non-specific serine/threonine protein kinase OS=Setaria italica OX=4555 PE=4 SV=1
486	758	tr|K3ZS46|K3ZS46_SETIT	25.9	2	1	1	1		58343	Uncharacterized protein OS=Setaria italica OX=4555 GN=101756687 PE=3 SV=1
486	759	tr|A0A368PYB7|A0A368PYB7_SETIT	25.9	1	1	1	1		74581	Uncharacterized protein OS=Setaria italica OX=4555 GN=SETIT_2G123400v2 PE=3 SV=1
659	760	tr|A0A368REP8|A0A368REP8_SETIT	25.86	1	1	1	1		80793	C2H2-type domain-containing protein OS=Setaria italica OX=4555 GN=SETIT_5G417300v2 PE=4 SV=1
659	761	tr|K3XEU1|K3XEU1_SETIT	25.86	1	1	1	1		87501	C2H2-type domain-containing protein OS=Setaria italica OX=4555 GN=101778823 PE=4 SV=1
401	738	tr|K4AD88|K4AD88_SETIT	25.75	3	1	1	1		31984	Alba domain-containing protein OS=Setaria italica OX=4555 GN=101782967 PE=4 SV=1
401	739	tr|K4AD66|K4AD66_SETIT	25.75	3	1	1	1		32270	Alba domain-containing protein OS=Setaria italica OX=4555 GN=101782967 PE=4 SV=1
401	766	tr|K3Z8T8|K3Z8T8_SETIT	25.75	3	1	1	1		29121	C3H1-type domain-containing protein OS=Setaria italica OX=4555 GN=101760101 PE=4 SV=1
660	762	tr|A0A368Q3P3|A0A368Q3P3_SETIT	25.73	6	1	1	1		22274	LEA_2 domain-containing protein OS=Setaria italica OX=4555 GN=SETIT_2G285900v2 PE=4 SV=1
660	763	tr|K4A2P8|K4A2P8_SETIT	25.73	6	1	1	1		23689	LEA_2 domain-containing protein OS=Setaria italica OX=4555 GN=101772513 PE=4 SV=1
665	792	tr|A0A368S6V9|A0A368S6V9_SETIT	25.68	1	1	1	1		84284	Uncharacterized protein OS=Setaria italica OX=4555 GN=SETIT_8G075100v2 PE=3 SV=1
662	765	tr|K4A9Q7|K4A9Q7_SETIT	25.66	2	1	1	1		49818	Uncharacterized protein OS=Setaria italica OX=4555 GN=101766477 PE=3 SV=1
663	767	tr|K3Y9P1|K3Y9P1_SETIT	25.39	3	1	1	1		28372	Uncharacterized protein OS=Setaria italica OX=4555 GN=101785449 PE=3 SV=1
663	768	tr|K3YVA8|K3YVA8_SETIT	25.39	3	1	1	1		28354	Uncharacterized protein OS=Setaria italica OX=4555 GN=101773958 PE=3 SV=1
663	769	tr|K3YJD1|K3YJD1_SETIT	25.39	3	1	1	1		28380	Uncharacterized protein OS=Setaria italica OX=4555 GN=101757215 PE=3 SV=1
169	1014	tr|A0A368PHL2|A0A368PHL2_SETIT	25.09	1	2	2	3		210711	Uncharacterized protein OS=Setaria italica OX=4555 GN=SETIT_1G044300v2 PE=3 SV=1
490	788	tr|A0A368Q416|A0A368Q416_SETIT	25.06	2	1	1	1		45882	BZIP domain-containing protein OS=Setaria italica OX=4555 GN=SETIT_2G278200v2 PE=4 SV=1
199	865	tr|K3Z4S4|K3Z4S4_SETIT	24.88	1	1	1	3		64544	Uncharacterized protein OS=Setaria italica OX=4555 GN=101754453 PE=3 SV=1
668	806	tr|K3Z8H7|K3Z8H7_SETIT	24.81	3	1	1	1		30973	UMP pyrophosphorylase OS=Setaria italica OX=4555 GN=101764295 PE=3 SV=1
491	796	tr|K3ZTD7|K3ZTD7_SETIT	24.75	2	1	1	1		49641	Uncharacterized protein OS=Setaria italica OX=4555 PE=4 SV=1
491	797	tr|A0A368PU80|A0A368PU80_SETIT	24.75	2	1	1	1		52521	Uncharacterized protein OS=Setaria italica OX=4555 GN=SETIT_2G020300v2 PE=4 SV=1
488	778	tr|K4A1Y6|K4A1Y6_SETIT	24.66	4	1	1	1		41815	Uncharacterized protein OS=Setaria italica OX=4555 PE=4 SV=1
667	804	tr|K3XZM4|K3XZM4_SETIT	24.56	6	1	1	1		17680	Uncharacterized protein OS=Setaria italica OX=4555 PE=4 SV=1
673	823	tr|K3Z5J1|K3Z5J1_SETIT	24.29	1	1	1	1		54852	Phosphotransferase OS=Setaria italica OX=4555 GN=101765641 PE=3 SV=1
672	822	tr|K3Z8I8|K3Z8I8_SETIT	24.03	2	1	1	1		31625	Uncharacterized protein OS=Setaria italica OX=4555 GN=101753893 PE=4 SV=1
406	800	tr|K3YDB6|K3YDB6_SETIT	23.91	2	1	1	1		45334	Uncharacterized protein OS=Setaria italica OX=4555 PE=4 SV=1
489	784	tr|K4AJ71|K4AJ71_SETIT	23.81	7	1	1	1		15316	VOC domain-containing protein OS=Setaria italica OX=4555 PE=4 SV=1
489	785	tr|A0A368SGQ0|A0A368SGQ0_SETIT	23.81	6	1	1	1		18711	VOC domain-containing protein OS=Setaria italica OX=4555 GN=SETIT_9G149600v2 PE=4 SV=1
507	903	tr|K3XDT3|K3XDT3_SETIT	23.68	0	1	1	1		156645	Uncharacterized protein OS=Setaria italica OX=4555 PE=4 SV=1
507	921	tr|A0A368R590|A0A368R590_SETIT	23.68	0	1	1	1		181930	Uncharacterized protein OS=Setaria italica OX=4555 GN=SETIT_5G155700v2 PE=4 SV=1
328	786	tr|K3YYL4|K3YYL4_SETIT	23.51	1	1	1	1		101924	Protein kinase domain-containing protein OS=Setaria italica OX=4555 PE=4 SV=1
328	787	tr|A0A368PP22|A0A368PP22_SETIT	23.51	1	1	1	1		105226	Protein kinase domain-containing protein OS=Setaria italica OX=4555 GN=SETIT_1G228500v2 PE=4 SV=1
496	817	tr|A0A368S4G1|A0A368S4G1_SETIT	23.42	6	1	1	1		13786	Uncharacterized protein OS=Setaria italica OX=4555 GN=SETIT_8G052400v2 PE=4 SV=1
496	818	tr|K3ZJ78|K3ZJ78_SETIT	23.42	2	1	1	1		35658	Fe2OG dioxygenase domain-containing protein OS=Setaria italica OX=4555 PE=3 SV=1
260	847	tr|A0A368RRY7|A0A368RRY7_SETIT	23.4	0	1	1	2		182038	Uncharacterized protein OS=Setaria italica OX=4555 GN=SETIT_7G044200v2 PE=3 SV=1
368	826	tr|K3ZL69|K3ZL69_SETIT	23.38	3	1	1	1		26992	Uncharacterized protein OS=Setaria italica OX=4555 PE=4 SV=1
405	791	tr|A0A368PUG7|A0A368PUG7_SETIT	23.37	1	1	1	1		62616	Uncharacterized protein OS=Setaria italica OX=4555 GN=SETIT_2G005000v2 PE=3 SV=1
674	827	tr|A0A368RY59|A0A368RY59_SETIT	23.26	4	1	1	1		28354	Uncharacterized protein OS=Setaria italica OX=4555 GN=SETIT_7G211100v2 PE=4 SV=1
675	833	tr|A0A368QWP7|A0A368QWP7_SETIT	23.14	3	1	1	1		33878	BHLH domain-containing protein OS=Setaria italica OX=4555 GN=SETIT_4G216400v2 PE=3 SV=1
675	834	tr|K3XXX3|K3XXX3_SETIT	23.14	3	1	1	1		36633	BHLH domain-containing protein OS=Setaria italica OX=4555 GN=SETIT_4G216400v2 PE=3 SV=1
203	1325	tr|K3ZQN2|K3ZQN2_SETIT	23.11	3	2	2	2	Deamidation (NQ)	95633	Uncharacterized protein OS=Setaria italica OX=4555 GN=SETIT_2G153600v2 PE=4 SV=1
676	839	tr|K3YI80|K3YI80_SETIT	22.87	2	1	1	1		37192	Uncharacterized protein OS=Setaria italica OX=4555 PE=4 SV=1
680	848	tr|K3ZQ63|K3ZQ63_SETIT	22.61	1	1	1	1		121241	Uncharacterized protein OS=Setaria italica OX=4555 GN=101773029 PE=4 SV=1
678	843	tr|K3XDP7|K3XDP7_SETIT	22.57	0	1	1	1		219903	Uncharacterized protein OS=Setaria italica OX=4555 GN=101755848 PE=4 SV=1
678	844	tr|K3XDN5|K3XDN5_SETIT	22.57	0	1	1	1		271222	Uncharacterized protein OS=Setaria italica OX=4555 GN=101755848 PE=4 SV=1
403	782	tr|K3ZM17|K3ZM17_SETIT	22.54	2	1	1	1		46813	Alpha-amylase OS=Setaria italica OX=4555 GN=SETIT_8G179800v2 PE=3 SV=1
257	813	tr|K3YZR5|K3YZR5_SETIT	22.47	3	1	1	2		50041	Uncharacterized protein OS=Setaria italica OX=4555 PE=4 SV=1
679	846	tr|A0A368PLE7|A0A368PLE7_SETIT	22.44	5	1	1	1	Acetylation (Protein N-term)	18563	X8 domain-containing protein OS=Setaria italica OX=4555 GN=SETIT_1G166200v2 PE=4 SV=1
369	875	tr|K3Y927|K3Y927_SETIT	22.37	2	1	1	1		32978	Xyloglucan endotransglucosylase/hydrolase OS=Setaria italica OX=4555 GN=101780751 PE=3 SV=1
367	795	tr|K3XUV5|K3XUV5_SETIT	22.37	1	1	1	1		135226	Uncharacterized protein OS=Setaria italica OX=4555 PE=4 SV=1
683	854	tr|A0A368S1Q5|A0A368S1Q5_SETIT	22.3	2	1	1	1		52120	MFS domain-containing protein OS=Setaria italica OX=4555 GN=SETIT_7G312200v2 PE=4 SV=1
682	852	tr|K3YI44|K3YI44_SETIT	22.25	2	1	1	1		43317	Tyrosine--tRNA ligase OS=Setaria italica OX=4555 GN=101754120 PE=3 SV=1
686	859	tr|K3Z4N9|K3Z4N9_SETIT	22.17	1	1	1	1		65907	ENTH domain-containing protein OS=Setaria italica OX=4555 PE=4 SV=1
686	860	tr|A0A368QI31|A0A368QI31_SETIT	22.17	1	1	1	1		66149	ENTH domain-containing protein OS=Setaria italica OX=4555 GN=SETIT_3G235800v2 PE=4 SV=1
407	835	tr|K4A4X6|K4A4X6_SETIT	22.02	1	1	1	1		143874	NTP_transf_2 domain-containing protein OS=Setaria italica OX=4555 PE=4 SV=1
503	870	tr|K3Z3D8|K3Z3D8_SETIT	21.86	1	1	1	1		112648	Protein kinase domain-containing protein OS=Setaria italica OX=4555 GN=101765233 PE=3 SV=1
298	871	tr|K3XPU7|K3XPU7_SETIT	21.83	2	1	1	2		99601	Uncharacterized protein OS=Setaria italica OX=4555 PE=4 SV=1
298	872	tr|A0A368RAE7|A0A368RAE7_SETIT	21.83	1	1	1	2		114508	Uncharacterized protein OS=Setaria italica OX=4555 GN=SETIT_5G304400v2 PE=4 SV=1
690	873	tr|A0A368Q3F3|A0A368Q3F3_SETIT	21.8	2	1	1	1		75531	RNA helicase OS=Setaria italica OX=4555 GN=SETIT_2G278900v2 PE=3 SV=1
344	867	tr|K3Z325|K3Z325_SETIT	21.66	0	1	1	1		237163	Glutamine amidotransferase type-2 domain-containing protein OS=Setaria italica OX=4555 PE=3 SV=1
344	868	tr|A0A368QH83|A0A368QH83_SETIT	21.66	0	1	1	1		241477	Glutamine amidotransferase type-2 domain-containing protein OS=Setaria italica OX=4555 GN=SETIT_3G153400v2 PE=3 SV=1
692	891	tr|A0A368RI14|A0A368RI14_SETIT	21.65	9	1	1	1		12675	Uncharacterized protein OS=Setaria italica OX=4555 GN=SETIT_6G041400v2 PE=4 SV=1
167	888	tr|K3Z3P5|K3Z3P5_SETIT	21.64	1	1	1	3		95010	Histidine--tRNA ligase OS=Setaria italica OX=4555 GN=101776314 PE=3 SV=1
302	996	tr|K3YP83|K3YP83_SETIT	21.48	0	1	1	2		198726	Uncharacterized protein OS=Setaria italica OX=4555 GN=101782050 PE=4 SV=1
411	887	tr|K3XMP8|K3XMP8_SETIT	21.45	5	1	1	1		17476	AIR carboxylase OS=Setaria italica OX=4555 PE=3 SV=1
411	890	tr|A0A368R4Q0|A0A368R4Q0_SETIT	21.45	1	1	1	1		67322	AIR carboxylase OS=Setaria italica OX=4555 GN=SETIT_5G141100v2 PE=3 SV=1
694	901	tr|A0A368SDG1|A0A368SDG1_SETIT	21.39	13	1	1	1		48584	DUF1618 domain-containing protein OS=Setaria italica OX=4555 GN=SETIT_9G058000v2 PE=4 SV=1
696	907	tr|A0A368QLL2|A0A368QLL2_SETIT	21.32	3	1	1	1		34680	Uncharacterized protein OS=Setaria italica OX=4555 GN=SETIT_3G336100v2 PE=4 SV=1
345	879	tr|K3ZQC6|K3ZQC6_SETIT	21.17	1	1	1	1		112975	LRRNT_2 domain-containing protein OS=Setaria italica OX=4555 GN=106804178 PE=4 SV=1
263	904	tr|K4A4Z8|K4A4Z8_SETIT	21.16	1	1	1	2		136474	Coatomer subunit alpha OS=Setaria italica OX=4555 GN=101759451 PE=4 SV=1
505	897	tr|K3YDC8|K3YDC8_SETIT	21.04	2	1	1	1		58953	F-box domain-containing protein OS=Setaria italica OX=4555 GN=SETIT_7G038900v2 PE=4 SV=1
266	927	tr|K4ALP0|K4ALP0_SETIT	21.03	2	1	1	2		34692	Uncharacterized protein OS=Setaria italica OX=4555 PE=4 SV=1
699	914	tr|K4ABC9|K4ABC9_SETIT	21.01	3	1	1	1		42299	Alpha-1 3-glucosyltransferase OS=Setaria italica OX=4555 GN=101773240 PE=3 SV=1
699	915	tr|K4A8J1|K4A8J1_SETIT	21.01	2	1	1	1		58539	Alpha-1 3-glucosyltransferase OS=Setaria italica OX=4555 GN=101773240 PE=3 SV=1
412	905	tr|K3Z326|K3Z326_SETIT	21	0	1	1	1		235891	Serine/threonine-protein kinase TOR OS=Setaria italica OX=4555 PE=3 SV=1
704	940	tr|K4A4Q1|K4A4Q1_SETIT	20.87	0	1	1	1	Deamidation (NQ)	212624	TPR_REGION domain-containing protein OS=Setaria italica OX=4555 PE=4 SV=1
704	941	tr|A0A368SG85|A0A368SG85_SETIT	20.87	0	1	1	1	Deamidation (NQ)	215267	TPR_REGION domain-containing protein OS=Setaria italica OX=4555 GN=SETIT_9G136900v2 PE=4 SV=1
705	943	tr|K4A5D6|K4A5D6_SETIT	20.86	1	1	1	1		102942	Protein kinase domain-containing protein OS=Setaria italica OX=4555 GN=101758102 PE=4 SV=1
706	951	tr|A0A368SHZ2|A0A368SHZ2_SETIT	20.84	1	1	1	1		141756	Uncharacterized protein OS=Setaria italica OX=4555 GN=SETIT_9G181300v2 PE=3 SV=1
707	953	tr|K3ZBY7|K3ZBY7_SETIT	20.72	2	1	1	1	Deamidation (NQ)	58063	Uncharacterized protein OS=Setaria italica OX=4555 PE=3 SV=1
300	957	tr|K3Y8S3|K3Y8S3_SETIT	20.51	3	1	1	2		33313	Uncharacterized protein OS=Setaria italica OX=4555 GN=101769018 PE=4 SV=1
347	932	tr|K3Y4P4|K3Y4P4_SETIT	20.49	1	1	1	1		158889	Rx_N domain-containing protein OS=Setaria italica OX=4555 GN=101784117 PE=3 SV=1
717	980	tr|K3Y4T1|K3Y4T1_SETIT	20.48	1	1	1	1		126334	RNA-dependent RNA polymerase OS=Setaria italica OX=4555 GN=101767540 PE=3 SV=1
709	958	tr|K3YG30|K3YG30_SETIT	20.31	1	1	1	1		100563	HMA domain-containing protein OS=Setaria italica OX=4555 GN=SETIT_6G190100v2 PE=3 SV=1
710	959	tr|K3ZQU8|K3ZQU8_SETIT	20.28	1	1	1	1		84049	Formin-like protein OS=Setaria italica OX=4555 GN=101766044 PE=3 SV=1
371	935	tr|A0A368QZ64|A0A368QZ64_SETIT	20.24	1	1	1	1		177479	Histone acetyltransferase OS=Setaria italica OX=4555 GN=SETIT_4G271400v2 PE=4 SV=1
729	999	tr|A0A368R0Y5|A0A368R0Y5_SETIT	20.2	1	1	1	1		44203	Uncharacterized protein OS=Setaria italica OX=4555 GN=SETIT_5G038300v2 PE=4 SV=1
123	929	tr|K3ZMI9|K3ZMI9_SETIT	20.16	1	1	1	4		117953	Uncharacterized protein OS=Setaria italica OX=4555 PE=4 SV=1
123	930	tr|A0A368S567|A0A368S567_SETIT	20.16	1	1	1	4		125254	Uncharacterized protein OS=Setaria italica OX=4555 GN=SETIT_8G074700v2 PE=4 SV=1
519	967	tr|K3YD32|K3YD32_SETIT	20.02	2	1	1	1		47226	Glycosyltransferase OS=Setaria italica OX=4555 GN=SETIT_7G194600v2 PE=3 SV=1
519	977	tr|K3ZT10|K3ZT10_SETIT	20.02	1	1	1	1		50136	Glycosyltransferase OS=Setaria italica OX=4555 GN=101773859 PE=3 SV=1
519	978	tr|K3YBY7|K3YBY7_SETIT	20.02	1	1	1	1		50341	Glycosyltransferase OS=Setaria italica OX=4555 PE=3 SV=1
519	979	tr|A0A368RSR8|A0A368RSR8_SETIT	20.02	1	1	1	1		50444	Glycosyltransferase OS=Setaria italica OX=4555 GN=SETIT_7G066700v2 PE=3 SV=1
