# Supplementary figures and images for: Protective effects of bioactive peptides in foxtail millet protein hydrolysates against experimental colitis in mice
Source: Royal Society of Chemistry journal article supplement (doi:10.1039/d1fo02482e), 2021-12-25

**Raw images for western blot**

**ZO-1**

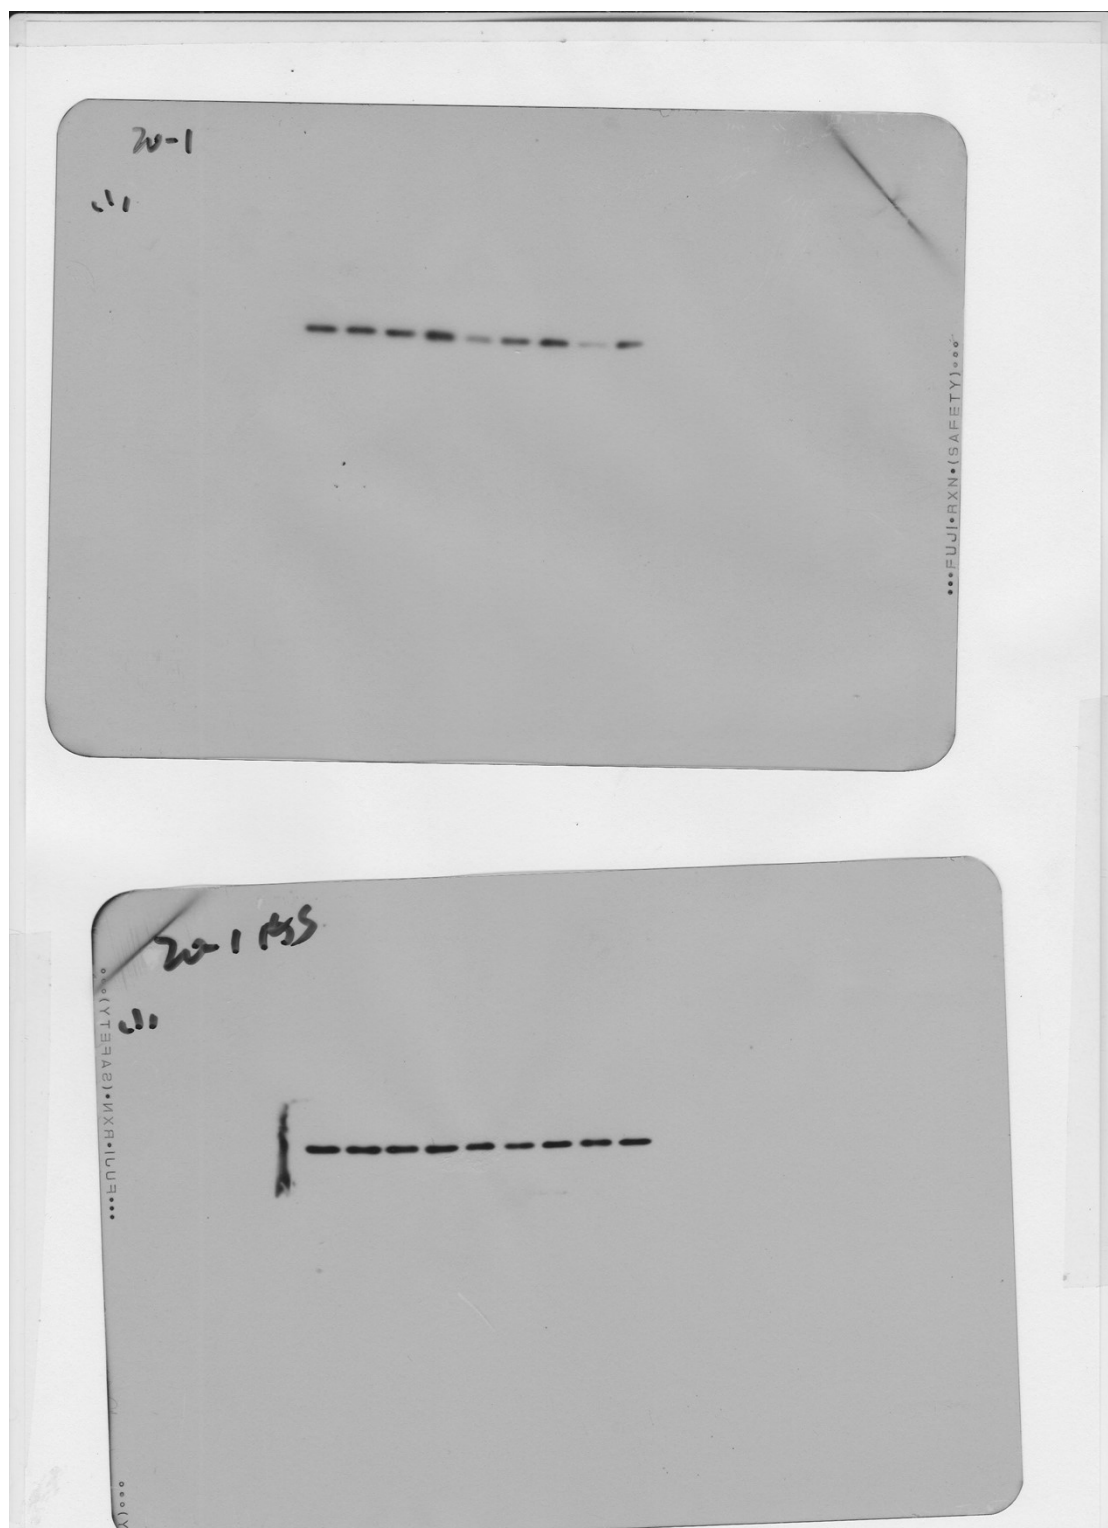

**Claudin-3**

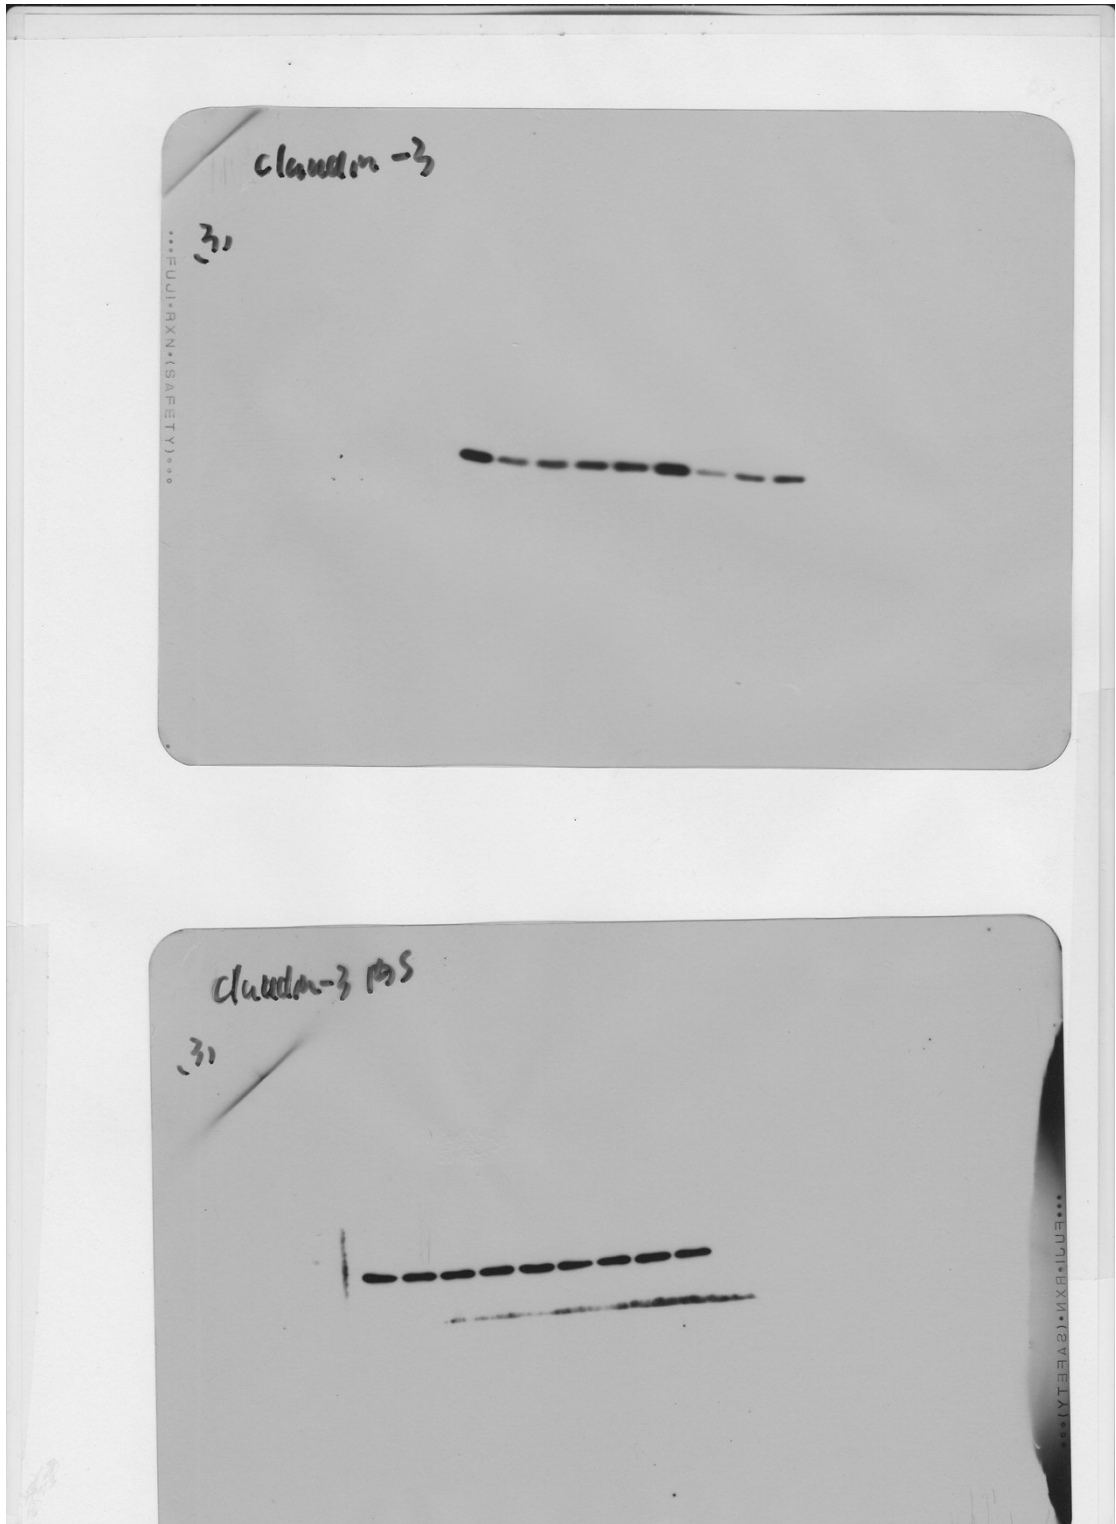

# Occludin

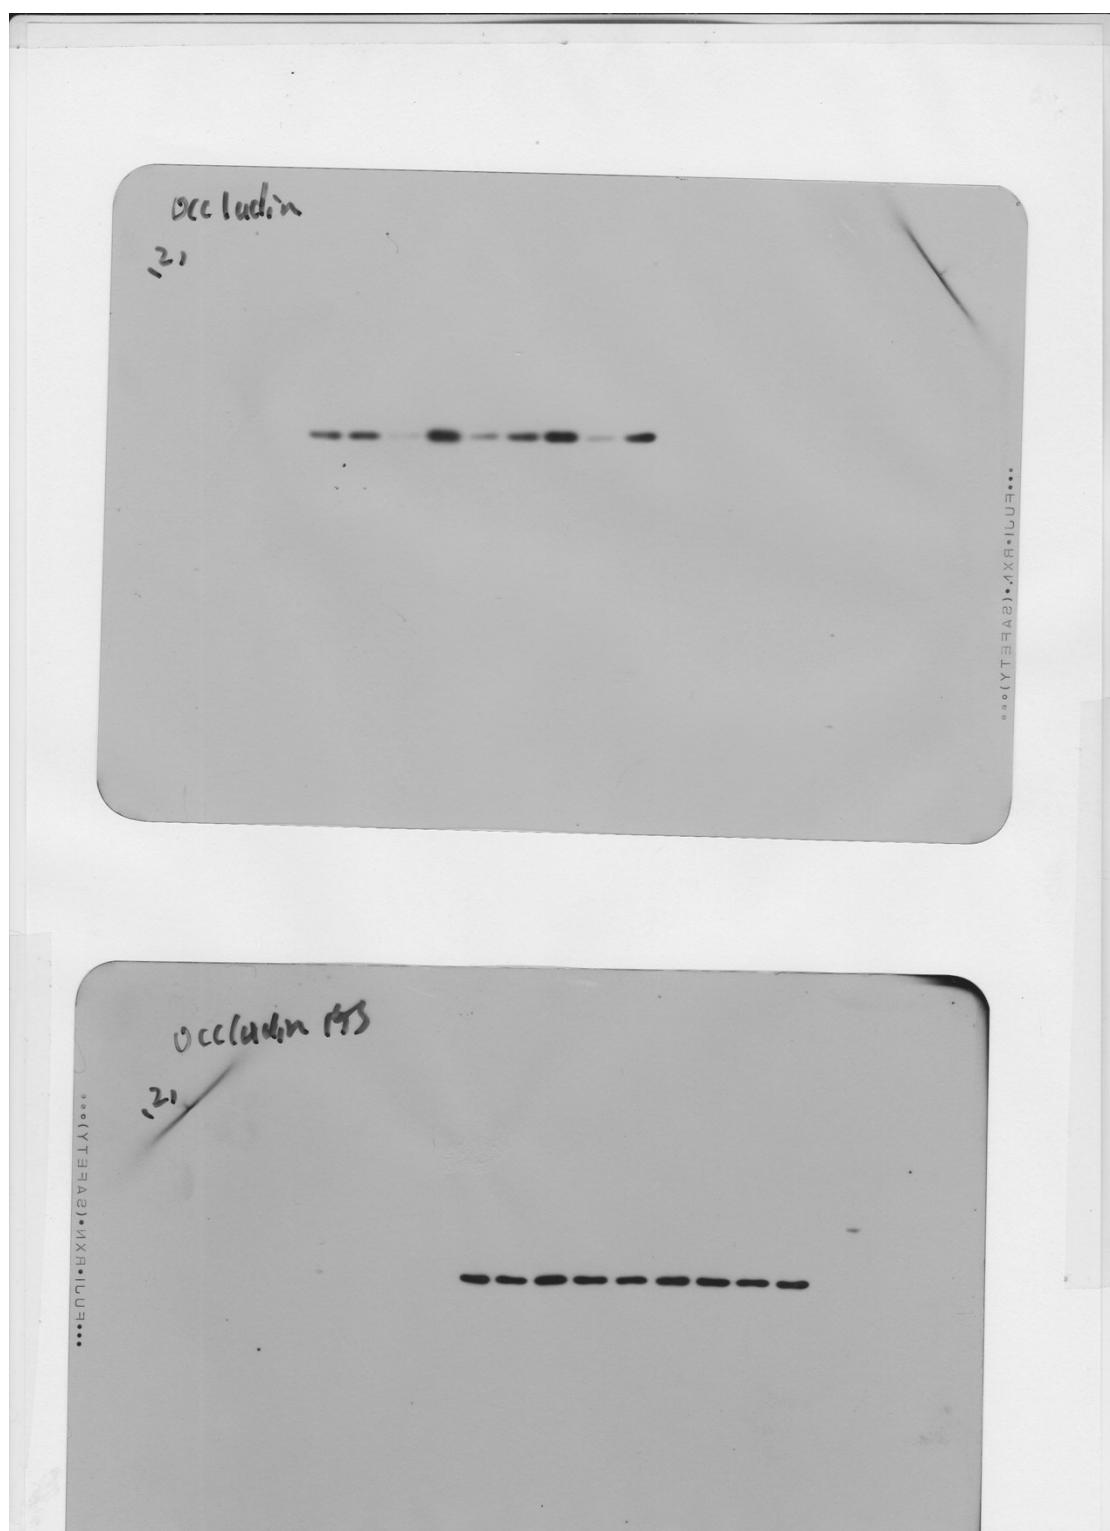

NF-κB

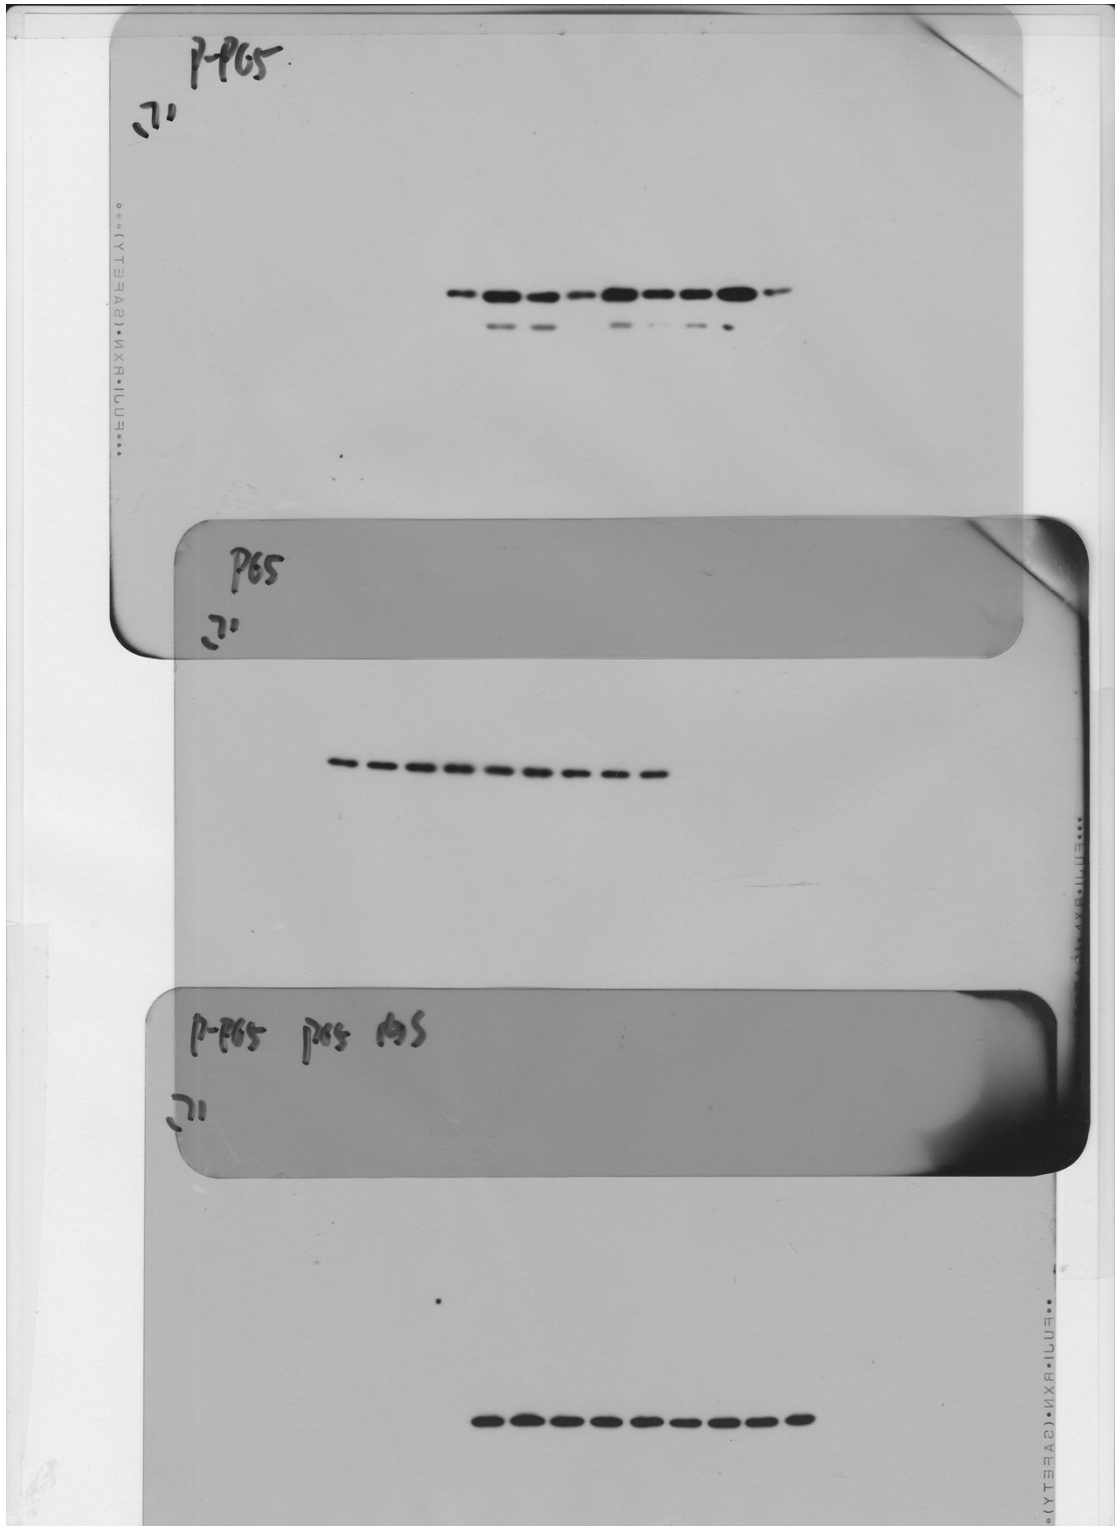

NLRP3

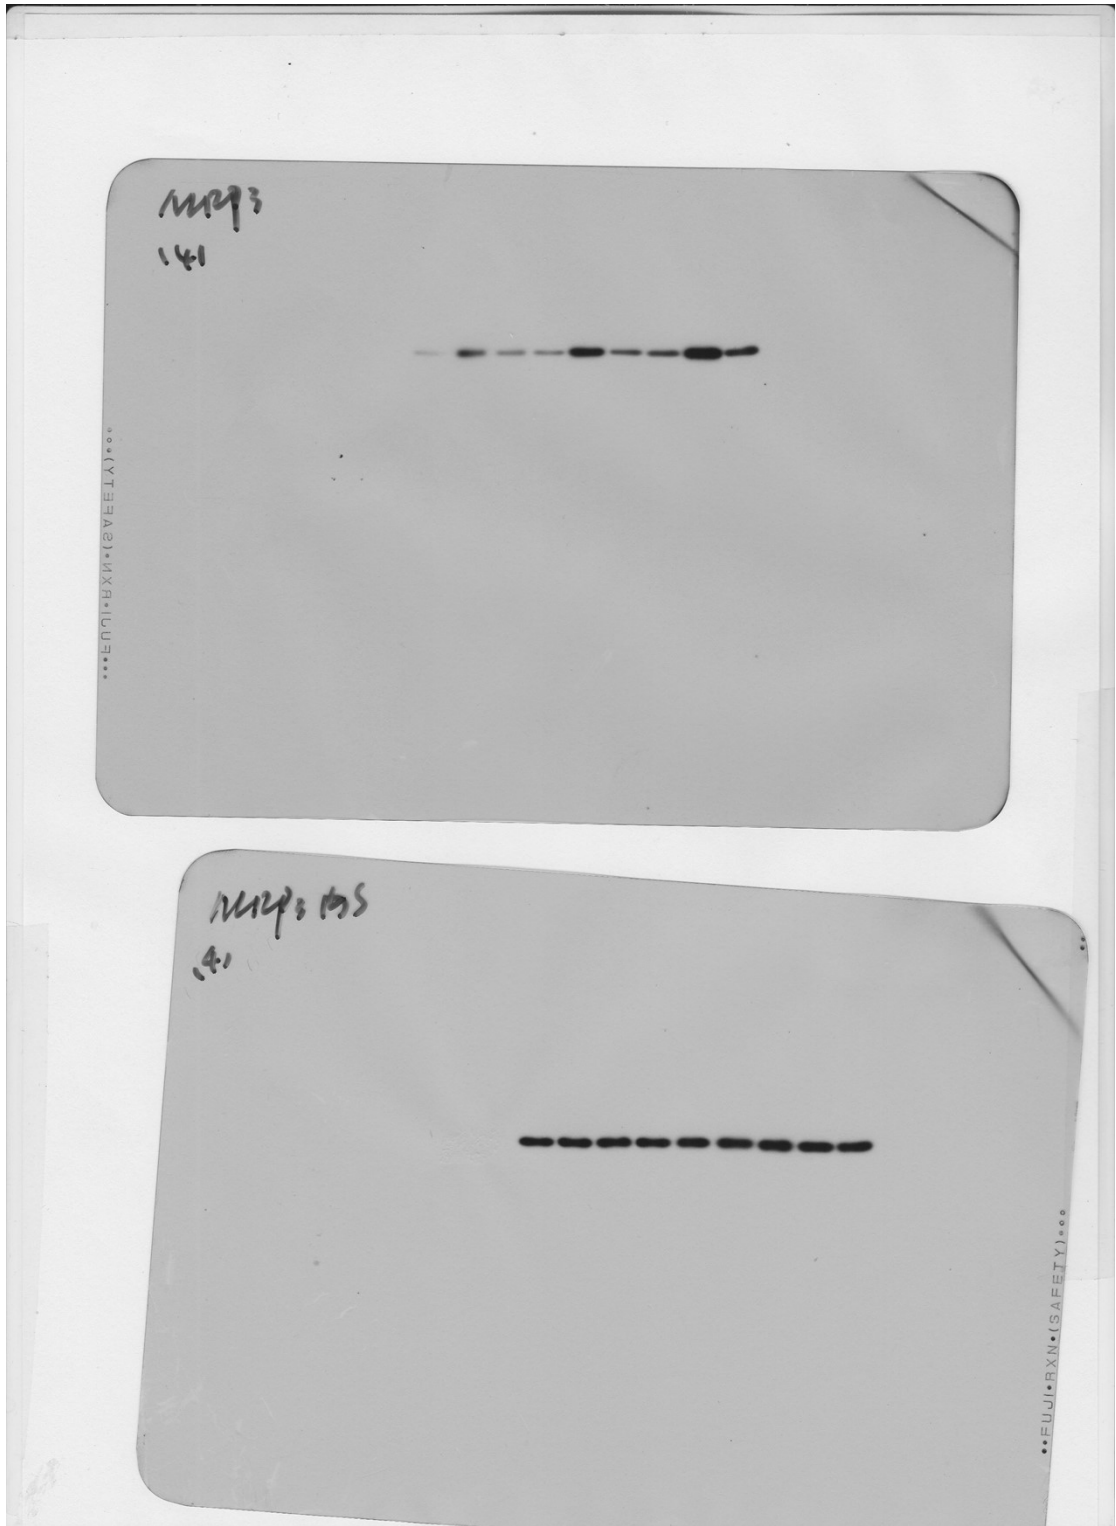

ASC

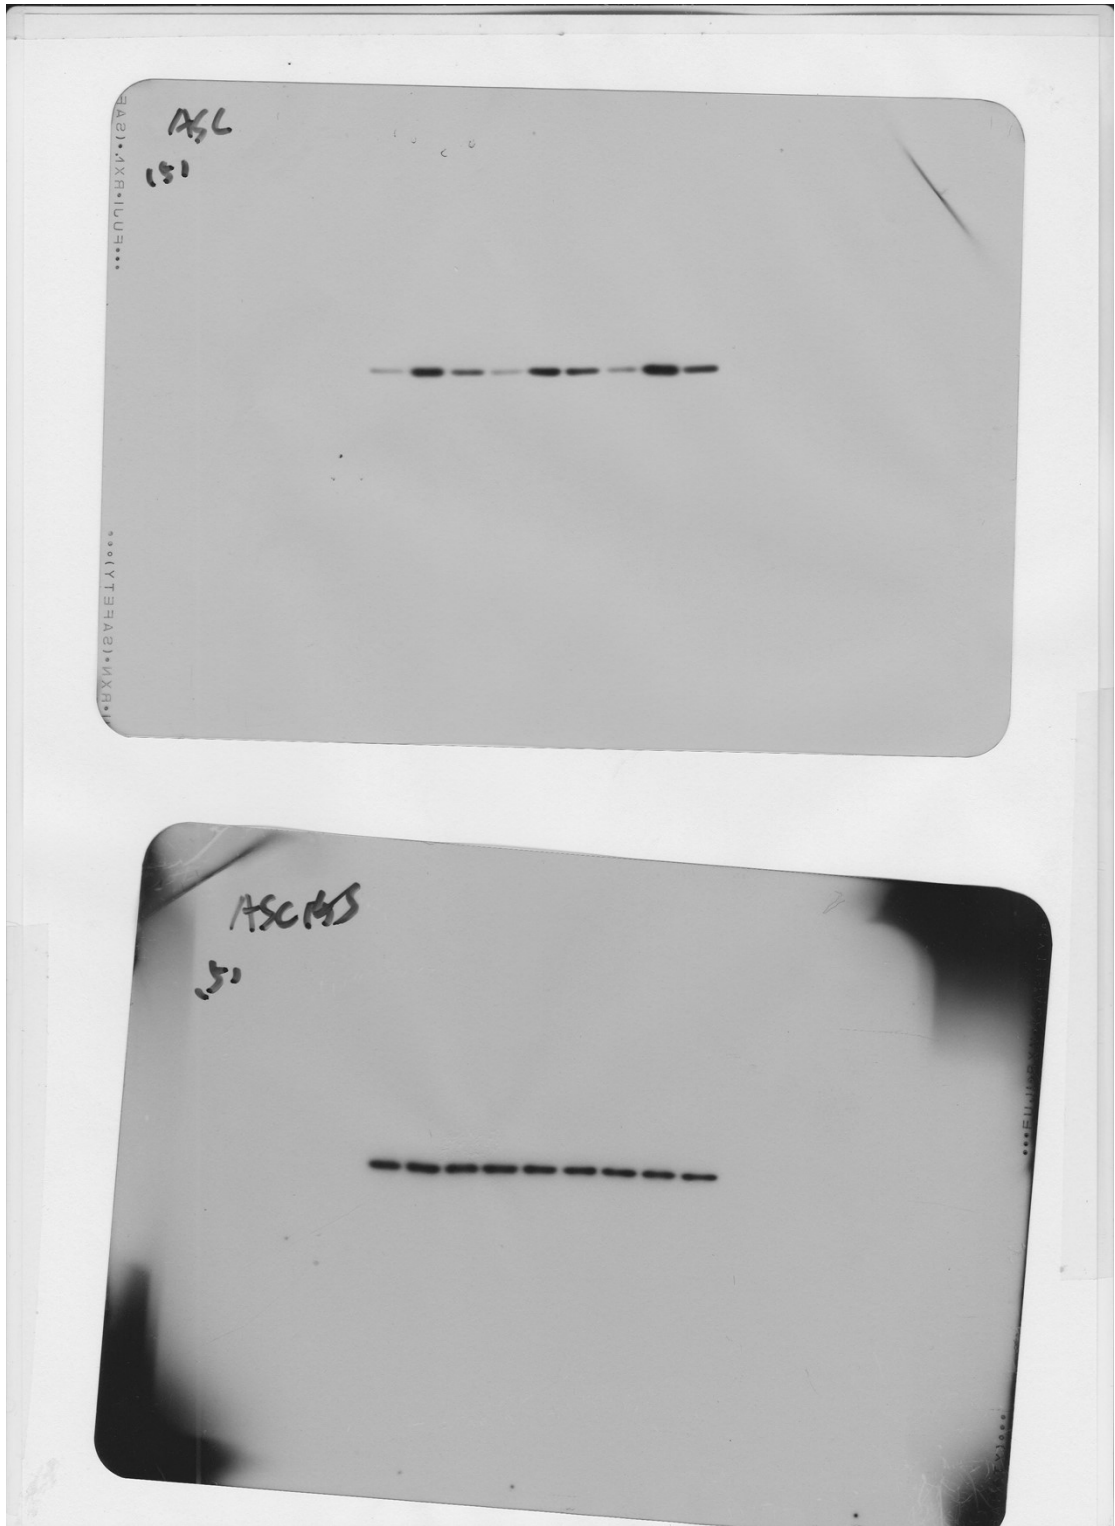

# Caspase-1

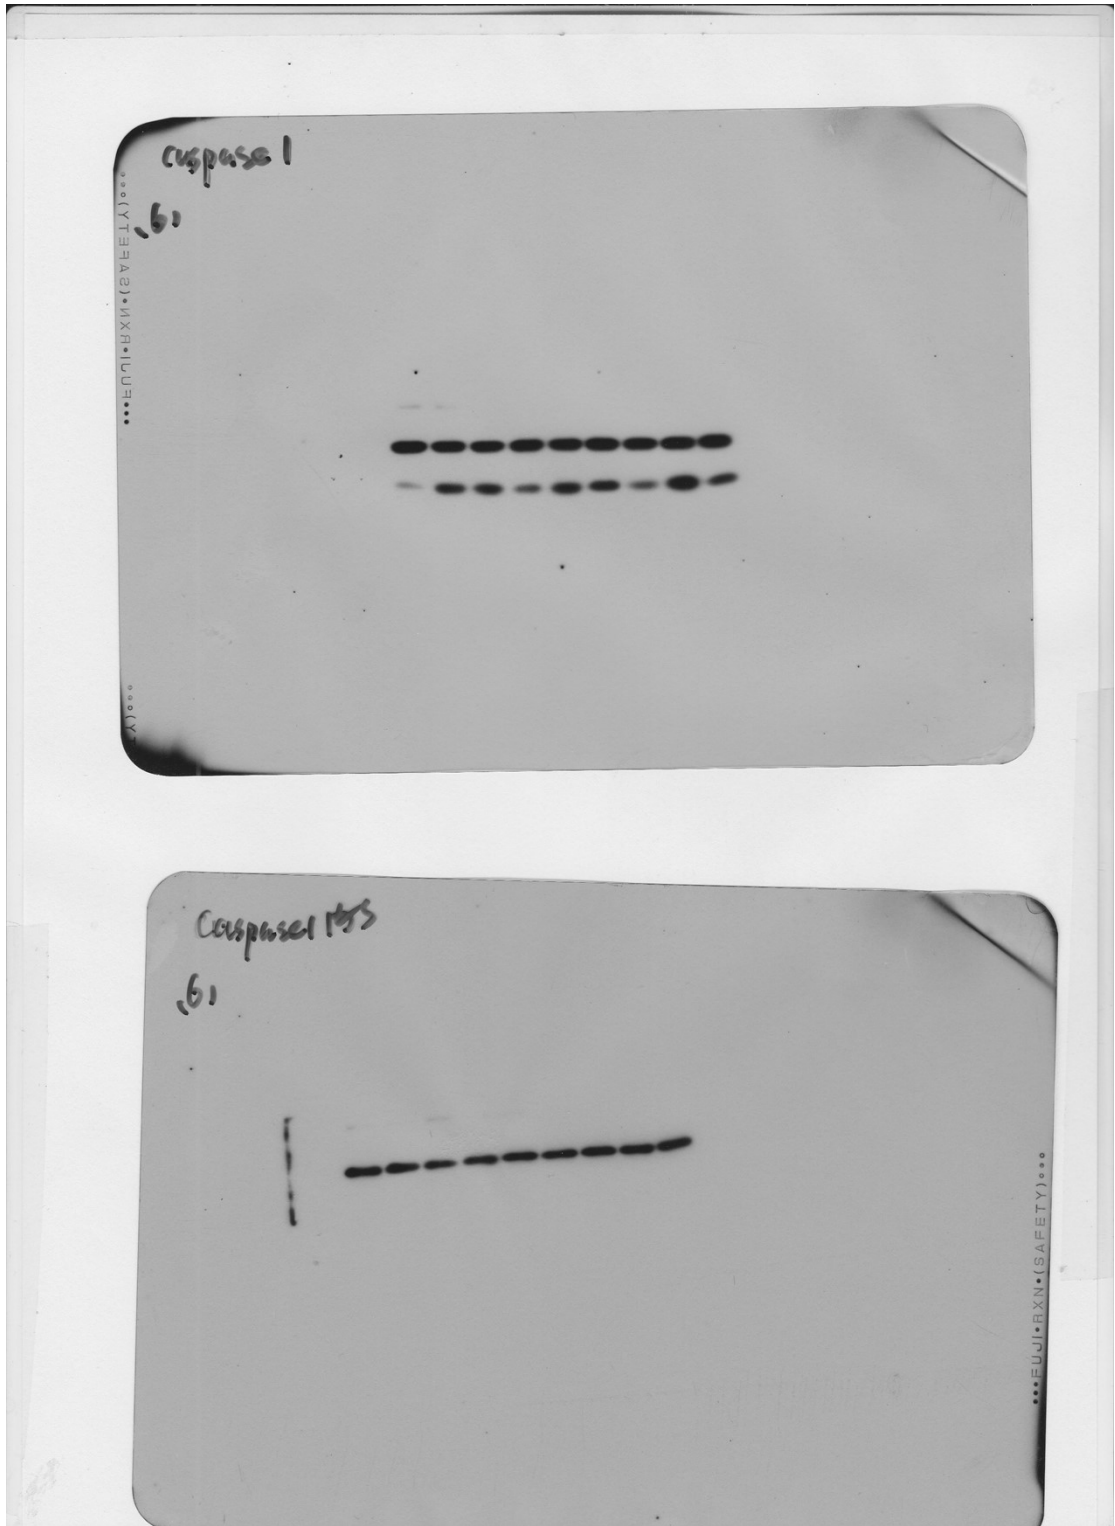

Supplement: d1fo02482e4.pdf [file d1fo02482e4.pdf]
